# Supplementary material for: Diastereoselective additions of H-phosphinates to alkenyl ketones under phase-transfer conditions
Source: Royal Society of Chemistry journal article supplement (doi:10.1039/d2cc02090d), 2022-01-01
Supplement: d2cc02090d1.pdf [file d2cc02090d1.pdf]

## Diastereoselective Additions of H-Phosphinates to Alkenyl Ketones Under Phase-Transfer Conditions

Krishna P. Yadavalli, Johannah E. Cummines, Chace J. Carlisle, and Salvatore D. Lepore\*

Department of Chemistry and Biochemistry, Florida Atlantic University, Boca Raton, FL 33431-0991

Fax: +1(561)297-2759; Email: slepore@fau.edu

### Table of Contents

|                                                                                    |     |
|------------------------------------------------------------------------------------|-----|
| 1. General Information.....                                                        | S2  |
| 2. Representative procedure for phosphinate addition reaction .....                | S2  |
| 3. Characterization data .....                                                     | S4  |
| 4. X-Ray crystallographic data for <b>3a</b> .....                                 | S11 |
| 5. Copies of <sup>1</sup> H, <sup>13</sup> C and <sup>31</sup> P NMR spectra ..... | S12 |
| 6. Synthesis of Enantiopure compound <b>3a</b> with HPLC data .....                | S49 |

## 1. General Information

Reactions were performed in oven-dried glassware with magnetic stirring under an argon atmosphere (unless otherwise stated). Column chromatographic purification of products was carried out using silica gel 60 (200-300 mesh). Visualization of TLC plates was accomplished with UV light (254 nm), followed by staining with vanillin and drying with a heat gun. The NMR spectra were recorded on a Bruker spectrometer using tetramethylsilane (TMS) in CDCl<sub>3</sub> as internal standard for <sup>1</sup>H and <sup>13</sup>C NMR (<sup>1</sup>H NMR: TMS at 0.00 ppm, CHCl<sub>3</sub> at 7.26 ppm; <sup>13</sup>C NMR: CDCl<sub>3</sub> at 77.16 ppm) and 85% H<sub>3</sub>PO<sub>4</sub> as standard for <sup>31</sup>P NMR. Data are represented as follows: chemical shift, multiplicity (s= singlet, d=doublet, t=triplet, m=multiple) coupling constant in Hertz (Hz). High-resolution mass spectra were recorded using electro spray ionization (ESI) analyzed in positive mode. All reagents were purchased from commercially available sources and were used without further purification. Solvents were purified and dried on a solvent system or purchased anhydrous where required.

## 2. Representative procedure for phosphinate addition reaction

In a scintillation vial (6 dram) containing adamantyl phosphinate (100 mg, 0.36 mmol, 1.0 equiv) in toluene (1.80 mL) was added the di-substituted alkenyl phenyl ketone (118 mg, 0.43 mmol, 1.2 equiv), 18-crown-6 (19 mg, 0.072 mmol, 0.2 equiv) and K<sub>2</sub>CO<sub>3</sub> (0500 mg, 3.62 mmol, 10 equiv). The reaction was stirred at room temperature for 4 d. Following its completion, the reaction mixture was quenched by adding water (10 mL) and extracted with ethyl acetate (3 × 10 mL). The combined organic extracts were dried (Na<sub>2</sub>SO<sub>4</sub>), filtered, and concentrated in vacuo to yield crude product, which was purified by flash chromatography to remove the excess alkenyl phenyl ketone and obtain the desired product at 25-30% EtOAc in hexanes. All spectral data are reported for the isolated major diastereomer of purified products.

All the mono and disubstituted alkenyl phenyl ketones were synthesized according to literature reports.<sup>1</sup> Menthol phosphinate used for the synthesis of compound **5** was prepared and isolated as diastereopure material according to a reported procedure.<sup>2</sup>

---

<sup>1</sup> (a) Ding, B.; Zhang, Z.; Liu, Y.; Sugiya, M.; Imamoto, T.; Zhang, W., Chemoselective Transfer Hydrogenation of  $\alpha,\beta$ -Unsaturated Ketones Catalyzed by Pincer-Pd Complexes Using Alcohol as a Hydrogen Source. *Org. Lett.* **2013**, *15*, 3690; (b) Tsuchiya, Y.; Hamashima, Y.; Sodeoka, M., A New Entry to Pd-H Chemistry: Catalytic Asymmetric Conjugate Reduction of Enones with EtOH and a Highly Enantioselective Synthesis of Warfarin. *Org. Lett.* **2006**, *8*, 4851; (c) Zhao, D.; Mao, L.; Wang, L.; Yang, D.; Wang, R., Catalytic asymmetric construction of tetrasubstituted carbon stereocenters by conjugate addition of dialkyl phosphine oxides to  $\beta,\beta$ -disubstituted  $\alpha,\beta$ -unsaturated carbonyl compounds. *Chem. Commun.* **2012**, *48*, 889.

<sup>2</sup> Handoko; Benslimane, Z.; Arora, P. S., Diselenide-Mediated Catalytic Functionalization of Hydrophosphoryl Compounds. *Org. Lett.* **2020**, *22*, 5811.

### 3. Characterization data

#### (3*R*,5*R*,7*R*)-Adamantan-1-yl (*S*)-((*R*)-3-oxo-1,3-diphenylpropyl)(phenyl)phosphinate (**3a**)

Yield: 126 mg, 72%; white solid (5:1 dr)

General procedure **A** was followed

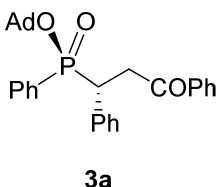

507.2070.

$^1\text{H}$  NMR (400 MHz,  $\text{CDCl}_3$ )  $\delta$  8.04 – 7.96 (m, 2H), 7.59 – 7.51 (m, 3H), 7.44 (ddd,  $J = 20.5, 7.6, 1.4$  Hz, 3H), 7.31 (dd,  $J = 7.6, 3.4$  Hz, 2H), 7.15 – 7.05 (m, 5H), 3.96 (ddd,  $J = 16.4, 9.3, 4.1$  Hz, 1H), 3.88 – 3.74 (m, 2H), 2.10 (s, 3H), 2.01 (d,  $J = 2.3$  Hz, 6H), 1.57 (t,  $J = 2.9$  Hz, 6H);  $^{13}\text{C}$  NMR (101 MHz,  $\text{CDCl}_3$ )  $\delta$  197.2 (d,  $J = 13.0$  Hz), 136.9, 135.9 (d,  $J = 2.9$  Hz), 133.2, 133.18, 131.9 (d,  $J = 9.3$  Hz), 131.6 (d,  $J = 2.7$  Hz), 129.5 (d,  $J = 6.2$  Hz), 128.6, 128.2, 127.9 (d,  $J = 2.5$  Hz), 127.8 (d,  $J = 12.6$  Hz), 126.6 (d,  $J = 3.1$  Hz), 82.9 (d,  $J = 9.7$  Hz), 44.5 (d,  $J = 3.8$  Hz), 43.3 (d,  $J = 100.0$  Hz), 37.8, 35.7, 31.14.  $^{31}\text{P}$  NMR (162 MHz,  $\text{CDCl}_3$ )  $\delta$  38.4. HRMS-ESI (m/z) calc for  $\text{C}_{31}\text{H}_{33}\text{O}_3\text{P}[\text{M} + \text{H}]^+$ : 485.2240 found 485.2250 and  $\text{C}_{31}\text{H}_{33}\text{O}_3\text{PNa}^+ [\text{M} + \text{Na}]^+$ : 507.2060 found

#### (3*S*,5*S*,7*S*)-Adamantan-1-yl (2-methyl-4-oxo-4-phenylbutan-2-yl)(phenyl)phosphinate (**3b**)

Yield: 127 mg, 85% gummy liquid

General procedure **A** was followed.

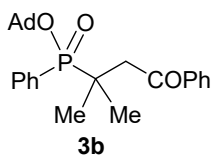

$^1\text{H}$  NMR (400 MHz,  $\text{CDCl}_3$ )  $\delta$  7.92 (d,  $J = 7.4$  Hz, 2H), 7.85 (dd,  $J = 9.4, 7.9$  Hz, 2H), 7.58 – 7.53 (m, 2H), 7.50 (dd,  $J = 7.5, 3.1$  Hz, 2H), 7.45 (t,  $J = 7.6$  Hz, 2H), 3.19 (d,  $J = 7.9$  Hz, 2H), 2.13 (s, 3H), 2.08 (s, 6H), 1.61 (s, 6H), 1.23 (dd,  $J = 30.9, 16.6$  Hz, 6H).  $^{13}\text{C}$  NMR (101 MHz,  $\text{CDCl}_3$ )  $\delta$  199.2 (d,  $J = 17.0$  Hz), 138.4, 133.3 (d,  $J = 8.7$  Hz), 132.9, 131.8 (d,  $J = 1.9$  Hz), 130.6, 128.6, 128.3, 128.0 (d,  $J = 11.8$  Hz), 82.6 (d,  $J = 10.1$  Hz), 44.4 (d,  $J = 3.4$  Hz), 40.6, 36.8, 35.8, 31.2, 20.6 (d,  $J = 10.3$  Hz).  $^{31}\text{P}$  NMR (162 MHz,  $\text{CDCl}_3$ )  $\delta$  43.9. HRMS-ESI (m/z) calc for  $\text{C}_{27}\text{H}_{33}\text{O}_3\text{P} [\text{M} + \text{H}]^+$ : 437.2240, found 437.2257 and  $\text{C}_{27}\text{H}_{33}\text{O}_3\text{PNa}^+ [\text{M} + \text{Na}]^+$ : 459.2060 found 459.2077.

#### (3*S*,5*S*,7*S*)-Adamantan-1-yl (*R*)-((*R*)-4-oxo-2,4-diphenylbutan-2-yl)(phenyl)phosphinate (**3c**)

Yield: 126 mg, 70%; white solid (50:1 dr)

General procedure **A** was followed.

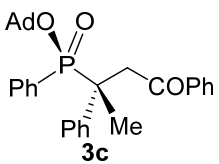

$^1\text{H}$  NMR (400 MHz,  $\text{CDCl}_3$ )  $\delta$  7.94–7.86 (m, 2H), 7.58 – 7.52 (m, 1H), 7.50 – 7.41 (m, 3H), 7.35 – 7.23 (m, 4H), 7.14 (t,  $J = 2.1$  Hz, 5H), 4.32 (dd,  $J = 18.1, 8.6$  Hz, 1H), 3.56 (dd,  $J = 18.0, 5.4$  Hz, 1H), 2.15 (s, 3H), 2.10 (s, 6H), 1.85 (d,  $J = 15.9$  Hz, 3H), 1.63 (s, 6H).  $^{13}\text{C}$  NMR (101 MHz,  $\text{CDCl}_3$ )  $\delta$  196.6 (d,  $J = 17.6$  Hz), 138.8 (d,  $J = 4.1$  Hz), 137.8 (d,  $J = 2.4$  Hz), 133.2 (d,  $J = 8.6$  Hz), 132.9, 131.6 (d,  $J = 2.7$  Hz), 130.5 (d,  $J = 122.5$  Hz), 128.5, 127.9 (d,  $J = 5.1$  Hz), 127.8, 127.5 (d,  $J = 6.1$  Hz), 127.4 (d,  $J = 2.8$  Hz), 126.1 (d,  $J = 3.6$  Hz), 83.1 (d,  $J = 10.4$  Hz), 44.4 (d,  $J = 3.5$  Hz), 43.5, 41.4, 35.8, 31.2, 19.4 (d,  $J = 4.2$  Hz).  $^{31}\text{P}$  NMR (162 MHz,  $\text{CDCl}_3$ )  $\delta$  40.8. HRMS-ESI (m/z) calc for  $\text{C}_{32}\text{H}_{35}\text{O}_3\text{P} [\text{M} + \text{H}]^+$ : 499.2397, found 499.2400 and  $\text{C}_{32}\text{H}_{35}\text{O}_3\text{PNa}^+ [\text{M} + \text{Na}]^+$ : 521.2216 found 521.2230.

#### (*tert*-Butyl (*R*)-((*R*)-4-oxo-2,4-diphenylbutan-2-yl) (phenyl)phosphinate (**3d**)

Yield: 157 mg, 74%; gummy liquid (35:1 dr)

General procedure **A** was followed.

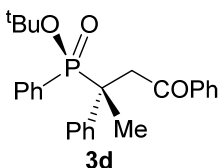

$^1\text{H}$  NMR (400 MHz,  $\text{CDCl}_3$ )  $\delta$  7.91 (dd,  $J = 8.4, 1.2$  Hz, 2H), 7.58 – 7.52 (m, 1H), 7.44 (dtd,  $J = 4.4, 3.4, 1.5$  Hz, 3H), 7.35 – 7.25 (m, 4H), 7.20 – 7.11 (m, 5H), 4.33 (dd,  $J = 18.1, 8.5$  Hz, 1H), 3.54 (dd,  $J = 18.0, 5.4$  Hz, 1H), 1.86 (d,  $J = 15.9$  Hz, 3H), 1.50 (s, 9H).  $^{13}\text{C}$  NMR (101 MHz,  $\text{CDCl}_3$ )  $\delta$  196.5 (d,  $J = 17.5$  Hz), 138.7 (d,  $J = 4.3$  Hz), 137.7 (d,  $J = 2.4$  Hz), 133.1 (d,  $J = 8.5$  Hz), 132.9, 131.7 (d,  $J = 2.7$  Hz), 130.3 (d,  $J = 122.6$  Hz), 128.6, 127.9 (d,  $J = 5.2$  Hz), 127.8, 127.6, 127.5 (d,  $J = 2.0$  Hz), 126.2 (d,  $J = 3.6$  Hz), 83.5 (d,  $J = 9.9$  Hz), 43.9 (d,  $J = 93.9$  Hz), 41.4, 30.7 (d,  $J =$

3.7 Hz), 19.3 (d,  $J = 4.1$  Hz).  $^{31}\text{P}$  NMR (162 MHz,  $\text{CDCl}_3$ )  $\delta$  40.8 HRMS-ESI ( $m/z$ ) calc for  $\text{C}_{26}\text{H}_{29}\text{O}_3\text{P}$  [ $\text{M} + \text{H}$ ] $^+$ :421.1927 found 421.1915 and  $\text{C}_{26}\text{H}_{29}\text{O}_3\text{PNa}^+$  [ $\text{M} + \text{Na}$ ] $^+$ :443.1747 found 443.1728.

*(Ethyl (R)-((R)-4-oxo-2,4-diphenylbutan-2-yl) (phenyl)phosphinate (3e)*

Yield: 68 mg, 30%; white solid (3:1 dr) (inseparable diastereomers)

General procedure A was followed

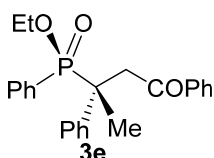

$^1\text{H}$  NMR (400 MHz,  $\text{CDCl}_3$ )  $\delta$  7.96-7.92 (m, 2H), 7.60 – 7.53 (m, 1H), 7.50 – 7.41 (m, 3H), 7.35 – 7.29 (m, 3H), 7.28 – 7.15 (m, 6H), 4.35 (dd,  $J = 18.0, 8.7$  Hz, 1H), 4.24 – 4.16 (m, 1H), 4.02 – 3.95 (m, 1H), 3.61 (dd,  $J = 17.9, 5.3$  Hz, 1H), 1.89 (d,  $J = 16.2$  Hz, 3H), 1.40 (t,  $J = 7.0$  Hz, 3H).  $^{13}\text{C}$  NMR (101 MHz,  $\text{CDCl}_3$ )  $\delta$  196.3 (d,  $J = 17.0$  Hz), 138.5 (d,  $J = 4.0$  Hz), 137.6 (d,  $J = 2.3$  Hz), 133.2 (d,  $J = 8.6$  Hz), 133.0, 132.1 (d,  $J = 2.7$  Hz), 128.6, 128.5, 127.93, 127.9, 127.8 (d,  $J = 4.9$  Hz), 127.7 (d,  $J = 3.1$  Hz), 126.4 (d,  $J = 3.6$  Hz), 61.6 (d,  $J = 7.3$  Hz), 43.5 (d,  $J = 92.3$  Hz), 41.4, 19.2 (d,  $J = 3.6$  Hz), 16.5 (d,  $J = 6.1$  Hz).  $^{31}\text{P}$  NMR (162 MHz,  $\text{CDCl}_3$ )  $\delta$  46.2 HRMS-ESI ( $m/z$ ) calc for  $\text{C}_{24}\text{H}_{25}\text{O}_3\text{P}$  [ $\text{M} + \text{H}$ ] $^+$ :393.1614, found 393.1614 and  $\text{C}_{24}\text{H}_{25}\text{O}_3\text{PNa}^+$  [ $\text{M} + \text{Na}$ ] $^+$ :415.1434 found 415.1415.

*(3S,5S,7S)-Adamantan-1-yl((R)-((R)-2-(naphthalen-1-yl)-4-oxo-4-phenylbutan-2-yl)(phenyl)phosphinate (3f)*

(E-chalcone) Yield: 158 mg, 80%; light yellow solid (single diastereomer).

(Z-chalcone) Yield: 135 mg, 68%; yellow solid (7:1 dr)

General procedure A was followed; reported data for E-chalcone ((2E)-1,3-diphenylprop-2-en-1-one) addition

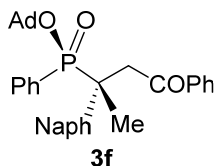

$^1\text{H}$  NMR (400 MHz,  $\text{CDCl}_3$ )  $\delta$  7.94 – 7.90 (m, 2H), 7.78 – 7.73 (m, 1H), 7.61 (dd,  $J = 12.1, 5.2$  Hz, 2H), 7.58-7.52 (m, 2H), 7.41 (ddd,  $J = 16.0, 14.3, 8.3$  Hz, 6H), 7.28 (t,  $J = 8.7$  Hz, 2H), 7.20 (td,  $J = 7.6, 3.5$  Hz, 2H), 4.43 (dd,  $J = 18.1, 8.6$  Hz, 1H), 3.67 (dd,  $J = 18.0, 5.3$  Hz, 1H), 2.16 (s, 3H), 2.12 (s, 6H), 1.97 (d,  $J = 15.8$  Hz, 3H), 1.63 (s, 6H).  $^{13}\text{C}$  NMR (101 MHz,  $\text{CDCl}_3$ )  $\delta$  196.5 (d,  $J = 17.5$  Hz), 137.8, 136.5 (d,  $J = 4.3$  Hz), 133.2 (d,  $J = 8.5$  Hz), 132.95, 132.9, 132.89, 131.9 (d,  $J = 2.6$  Hz), 131.7 (d,  $J = 2.8$  Hz), 130.4 (d,  $J = 122.6$  Hz), 128.6, 128.1, 127.9, 127.4 (d,  $J = 12.1$  Hz), 127.25, 127.2, 126.7, 126.1 (d,  $J = 3.5$  Hz), 125.5 (d,  $J = 5.7$  Hz), 83.2 (d,  $J = 10.4$  Hz), 44.5 (d,  $J = 3.2$  Hz), 43.7, 41.6, 35.8, 31.2, 19.6 (d,  $J = 3.7$  Hz).  $^{31}\text{P}$  NMR (162 MHz,  $\text{CDCl}_3$ )  $\delta$  40.7 HRMS-ESI ( $m/z$ ) calc for  $\text{C}_{36}\text{H}_{37}\text{O}_3\text{P}$  [ $\text{M} + \text{H}$ ] $^+$ :549.2553, found 549.2552 and  $\text{C}_{36}\text{H}_{37}\text{O}_3\text{PNa}^+$  [ $\text{M} + \text{Na}$ ] $^+$ :571.2373 found 571.2353.

*(3S,5S,7S)-Adamantan-1-yl ((R)-((R)-1-oxo-1,3,5-triphenylpentan-3-yl)(phenyl)phosphinate (3g)*

Yield: 75 mg, 47%; white solid (50:1 dr)

General procedure A was followed.

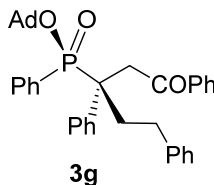

$^1\text{H}$  NMR (400 MHz,  $\text{CDCl}_3$ )  $\delta$  8.05 – 8.00 (m, 2H), 7.60 (ddd,  $J = 6.7, 3.9, 1.2$  Hz, 1H), 7.51 (t,  $J = 7.6$  Hz, 2H), 7.46 – 7.39 (m, 1H), 7.34 – 7.18 (m, 9H), 7.15 – 7.03 (m, 5H), 4.13 (dd,  $J = 18.6, 9.7$  Hz, 1H), 4.00 (dd,  $J = 18.7, 6.3$  Hz, 1H), 3.37 – 3.26 (m, 1H), 2.91 – 2.78 (m, 2H), 2.66 – 2.54 (m, 1H), 2.15 (s, 3H), 2.11 (d,  $J = 2.5$  Hz, 6H), 1.62 (s, 6H).  $^{13}\text{C}$  NMR (101 MHz,  $\text{CDCl}_3$ )  $\delta$  196.7 (d,  $J = 17.7$  Hz), 142.9, 139.7 (d,  $J = 4.5$  Hz), 137.6, 133.2, 133.1, 133.0, 131.6 (d,  $J = 16.9$  Hz), 130.3, 128.6 (d,  $J = 4.9$  Hz), 128.4, 128.1 (d,  $J = 4.8$  Hz), 127.9, 127.5, 127.3 (d,  $J = 2.8$  Hz), 126.3 (d,  $J = 3.5$  Hz), 125.8, 83.6 (d,  $J = 10.6$  Hz), 47.4 (d,  $J = 92.4$  Hz), 44.5 (d,  $J = 3.6$  Hz), 36.3 (d,  $J = 32.2$  Hz), 35.8, 35.4 (d,  $J = 3.4$  Hz), 32.1, 31.2.  $^{31}\text{P}$  NMR (162 MHz,  $\text{CDCl}_3$ )  $\delta$  41.0 HRMS-ESI ( $m/z$ ) calc for  $\text{C}_{39}\text{H}_{41}\text{O}_3\text{P}$  [ $\text{M} + \text{H}$ ] $^+$ :589.2866 found 589.2844.

(3*S*,5*S*,7*S*)-Adamantan-1-yl(*R*)-((*R*)-1-(2-oxo-2-phenylethyl)-2,3-dihydro-1*H*-inden-1-yl)(phenyl)phosphinate (**3h**)

Yield: 19 mg, 30%; brown gummy liquid (11:1 dr)

General procedure **A** was followed on (0.12 mmol scale) at 35 °C for 4 d, purified by prep TLC after aqueous workup.

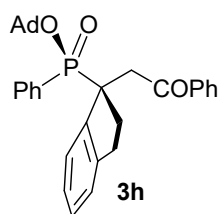

<sup>1</sup>H NMR (400 MHz, CDCl<sub>3</sub>) δ 7.89 (d, *J* = 8.3 Hz, 2H), 7.57 – 7.40 (m, 6H), 7.30 (dt, *J* = 10.6, 5.5 Hz, 2H), 7.17 (d, *J* = 6.8 Hz, 1H), 7.07 (p, *J* = 7.2 Hz, 2H), 6.97 (d, *J* = 7.0 Hz, 1H), 4.02 (dd, *J* = 17.1, 9.1 Hz, 1H), 3.72 (dd, *J* = 17.2, 6.1 Hz, 1H), 2.91 – 2.79 (m, 1H), 2.72 – 2.44 (m, 2H), 2.36 (dt, *J* = 16.3, 8.3 Hz, 1H), 2.16 (s, 3H), 2.13 (s, 6H), 1.63 (s, 6H). <sup>13</sup>C NMR (101 MHz, CDCl<sub>3</sub>) δ 197.5 (d, *J* = 15.3 Hz), 145.4 (d, *J* = 6.8 Hz), 140.9, 138.1, 133.1 (d, *J* = 8.7 Hz), 132.8, 132.0, 131.7, 130.9, 128.2 (d, *J* = 47.8 Hz), 127.5 (d, *J* = 11.9 Hz), 127.1 (d, *J* = 3.4 Hz), 125.6 (d, *J* = 3.1 Hz), 125.1, 124.0, 83.1 (d, *J* = 10.2 Hz), 53.2 (d, *J* = 98.8 Hz), 44.5 (d, *J* = 3.6 Hz), 40.1, 35.8, 31.3,

31.0, 30.8. <sup>31</sup>P NMR (162 MHz, CDCl<sub>3</sub>) δ 40.0 HRMS-ESI (m/z) calc for C<sub>33</sub>H<sub>35</sub>O<sub>3</sub>P [M+ H]<sup>+</sup>:511.2397 found 511.2398.

(3*R*,5*R*,7*R*)-Adamantan-1-yl (*S*)-((*R*)-3,4-dimethyl-1-oxo-1-phenylpentan-3-yl)(phenyl)phosphinate (**3i**)

Yield: 85 mg, 51%; gummy liquid (single diastereomer)

General procedure **A** was followed.

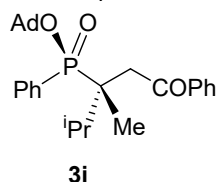

<sup>1</sup>H NMR (400 MHz, CDCl<sub>3</sub>) δ 7.99 (d, *J* = 7.3 Hz, 2H), 7.84 (dd, *J* = 18.9, 10.4 Hz, 2H), 7.59 – 7.52 (m, 2H), 7.50 – 7.41 (m, 4H), 3.41 (dd, *J* = 16.1, 11.0 Hz, 1H), 3.27 (dd, *J* = 16.0, 12.9 Hz, 1H), 2.23 – 2.13 (m, 1H), 2.07 (s, 3H), 1.98 (s, 6H), 1.55 (s, 6H), 1.36 (d, *J* = 16.6 Hz, 3H), 1.02 (dd, *J* = 6.9, 3.2 Hz, 6H). <sup>13</sup>C NMR (101 MHz, CDCl<sub>3</sub>) δ 199.4 (d, *J* = 11.5 Hz), 138.6, 133.7 (d, *J* = 69.0 Hz), 133.2 (d, *J* = 9.0 Hz), 132.7, 131.6 (d, *J* = 2.6 Hz), 128.4 (d, *J* = 21.7 Hz), 128.1, 127.9 (d, *J* = 11.8 Hz), 83.1 (d, *J* = 10.4 Hz), 44.4 (d, *J* = 3.3 Hz), 43.8 (d, *J* = 98.1 Hz), 38.6, 35.8, 31.5, 31.2,

19.0 (d, *J* = 2.1 Hz), 18.9. <sup>31</sup>P NMR (162 MHz, CDCl<sub>3</sub>) δ 43.9 HRMS-ESI (m/z) calc for C<sub>29</sub>H<sub>37</sub>O<sub>3</sub>P [M+ H]<sup>+</sup>:465.2553, found 465.2548 and C<sub>29</sub>H<sub>37</sub>O<sub>3</sub>PNa<sup>+</sup> [M+ Na]<sup>+</sup>:487.2373 found 487.2350.

(3*S*,5*S*,7*S*)-Adamantan-1-yl (*R*)-((*R*)-3-oxo-1-phenylcyclopentyl)(phenyl)phosphinate (**3j**)

Yield: 72 mg, 46%; white solid (1:1 dr) (Inseparable diastereomers)

General procedure **A** was followed.

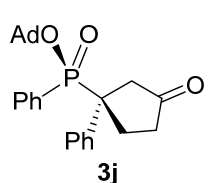

<sup>1</sup>H NMR (400 MHz, CDCl<sub>3</sub>) major diastereomer δ 7.50 – 7.41 (m, 1H), 7.32 – 7.24 (m, 4H), 7.24 – 7.14 (m, 3H), 7.05 – 6.95 (m, 2H), 3.29 – 3.15 (m, 1H), 3.14 – 2.92 (m, 1H), 2.81 – 2.56 (m, 2H), 2.47 – 2.21 (m, 2H), 2.11 (s, 3H), 2.02 (s, 6H), 1.58 (s, 6H). <sup>13</sup>C NMR (101 MHz, CDCl<sub>3</sub>) δ 216.1, 140.1, 132.8 (d, *J* = 8.7 Hz), 131.9, 130.5 (d, *J* = 124.0 Hz), 128.6 (d, *J* = 4.2 Hz), 127.7 (d, *J* = 2.2 Hz), 127.6 (d, *J* = 3.7 Hz), 126.9 (d, *J* = 3.2 Hz), 84.0 (d, *J* = 9.9 Hz), 50.3 (d, *J* = 97.2 Hz), 46.2, 44.3 (d, *J* = 3.6 Hz), 36.7, 35.7, 31.2, 30.2. <sup>31</sup>P NMR (162 MHz, CDCl<sub>3</sub>) δ 39.3 HRMS-ESI

(m/z) calc for C<sub>27</sub>H<sub>31</sub>O<sub>3</sub>P [M+ H]<sup>+</sup>:435.2084, found 435.2072 and C<sub>27</sub>H<sub>31</sub>O<sub>3</sub>PNa<sup>+</sup> [M+ Na]<sup>+</sup>:457.1894 found 457.1903.

(3*R*,5*R*,7*R*)-Adamantan-1-yl(*S*)-phenyl((*S*)-1-phenyl-2-(phenylsulfonyl)ethyl)phosphinate (**3k**)

Yield: 112 mg, 59%; white solid (2:1 dr)

General procedure **A** was followed.

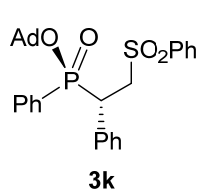

<sup>1</sup>H NMR (400 MHz, CDCl<sub>3</sub>) δ 7.45 (dd, *J* = 8.4, 1.2 Hz, 2H), 7.43 – 7.36 (m, 4H), 7.23 (ddd, *J* = 12.5, 7.9, 5.5 Hz, 4H), 6.95 – 6.90 (m, 1H), 6.84 (t, *J* = 7.7 Hz, 2H), 6.76 (dd, *J* = 7.4, 1.7 Hz, 2H), 3.99 (ddd, *J* = 8.0, 6.4, 4.1 Hz, 2H), 3.65 (ddd, *J* = 17.6, 10.7, 3.6 Hz, 1H), 2.13 (s, 3H), 2.03 (s, 6H), 1.59 (s, 6H). <sup>13</sup>C NMR (101 MHz, CDCl<sub>3</sub>) δ 139.8, 133.0, 132.1, 131.9 (d, *J* = 2.8 Hz), 131.8 (d, *J* = 9.5 Hz), 130.8, 129.5 (d, *J* = 6.0 Hz), 128.7, 128.0, 127.9 (d, *J* = 1.8 Hz), 127.7, 127.0 (d, *J* = 3.3 Hz), 84.0 (d, *J* = 9.7 Hz), 55.4 (d, *J* = 1.4 Hz), 44.5 (d, *J* = 3.8 Hz), 44.2, 35.6, 31.2. <sup>31</sup>P NMR (162 MHz, CDCl<sub>3</sub>) δ 35.5 HRMS-ESI (m/z) calc for C<sub>30</sub>H<sub>33</sub>NO<sub>4</sub>PS [M+ H]<sup>+</sup>:521.1915, found 521.1915 and

C<sub>30</sub>H<sub>33</sub>NO<sub>4</sub>PS Na<sup>+</sup> [M+ Na]<sup>+</sup>:543.1729 found 543.1729.

*(3R,5R,7R)*-Adamantan-1-yl(*S*)-(*R*)-2-cyano-1-phenylethyl (phenyl)phosphinate (**3l**)

Yield: 69 mg, 47% white solid (4:1 dr)

General procedure **A** was followed.

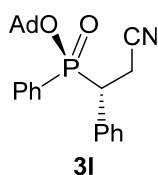

$^1\text{H}$  NMR (400 MHz,  $\text{CDCl}_3$ )  $\delta$  7.52 – 7.40 (m, 3H), 7.34 – 7.27 (m, 2H), 7.16 (dd,  $J$  = 3.6, 3.0 Hz, 3H), 7.08 – 7.03 (m, 2H), 3.37 (ddd,  $J$  = 15.8, 10.6, 5.0 Hz, 1H), 3.26 (ddd,  $J$  = 17.1, 7.8, 5.0 Hz, 1H), 3.02 (dt,  $J$  = 17.1, 10.4 Hz, 1H), 2.13 (s, 3H), 2.05 (s, 6H), 1.59 (s, 6H).  $^{13}\text{C}$  NMR (101 MHz,  $\text{CDCl}_3$ )  $\delta$  133.3 (d,  $J$  = 3.0 Hz), 132.2 (d,  $J$  = 2.8 Hz), 131.8, 130.6, 128.9 (d,  $J$  = 5.8 Hz), 128.5 (d,  $J$  = 2.3 Hz), 128.1 (d,  $J$  = 12.9 Hz), 127.7 (d,  $J$  = 3.0 Hz), 118.1 (d,  $J$  = 17.3 Hz), 84.2 (d,  $J$  = 9.5 Hz), 44.7, 44.4 (d,  $J$  = 3.8 Hz), , 35.6, 31.2, 18.3.  $^{31}\text{P}$  NMR (162 MHz,  $\text{CDCl}_3$ )  $\delta$  35.2 HRMS-ESI (m/z) calc for  $\text{C}_{25}\text{H}_{28}\text{NO}_2\text{P}$  [ $\text{M}^+$  H] $^+$ :406.1930, found 406.1938 and  $\text{C}_{25}\text{H}_{28}\text{NO}_2\text{PNa}^+$  [ $\text{M}^+$  Na] $^+$ :428.1750 found 428.1767.

*tert*-Butyl (*S*)-(*R*)-3-oxo-1,3-diphenylpropyl(phenyl)phosphinate (**3m**)

Yield:143 mg, 70% white solid (5:1 dr)

General procedure **A** was followed.

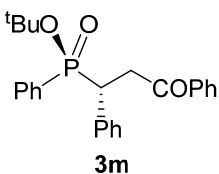

$^1\text{H}$  NMR (400 MHz,  $\text{CDCl}_3$ ) major diastereomer  $\delta$  7.99 – 7.95 (m, 2H), 7.58 – 7.49 (m, 3H), 7.45 (t,  $J$  = 7.6 Hz, 2H), 7.42 – 7.37 (m, 1H), 7.31 – 7.28 (m, 2H), 7.12 – 7.04 (m, 5H), 3.96 (ddd,  $J$  = 16.5, 9.2, 4.1 Hz, 1H), 3.87 – 3.70 (m, 2H), 1.40 (s, 9H).  $^{13}\text{C}$  NMR (101 MHz,  $\text{CDCl}_3$ )  $\delta$  197.1 (d,  $J$  = 12.7 Hz), 136.8, 135.9, 133.2, 132.9, 131.9 (d,  $J$  = 9.3 Hz), 131.6, 129.5 (d,  $J$  = 6.1 Hz), 128.6, 128.1, 127.9 (d,  $J$  = 2.7 Hz), 127.8, 126.7 (d,  $J$  = 3.1 Hz), 83.3 (d,  $J$  = 9.3 Hz), 43.2 (d,  $J$  = 100.1 Hz), 37.8, 30.8 (d,  $J$  = 3.9 Hz).  $^{31}\text{P}$  NMR (162 MHz,  $\text{CDCl}_3$ )  $\delta$  38.4 HRMS-ESI (m/z)

calc for  $\text{C}_{25}\text{H}_{27}\text{O}_3\text{PNa}^+$  [ $\text{M}^+$  Na] $^+$ :429.1590 found 429.1604.

Ethyl (*S*)-(*R*)-3-oxo-1,3-diphenylpropyl(phenyl)phosphinate (**3n**)

Yield:166 mg, 75%; white solid (3:1 dr) (Inseparable diastereomers)

General procedure **A** was followed.

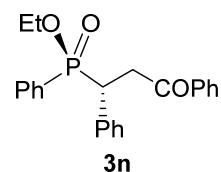

$^1\text{H}$  NMR (400 MHz,  $\text{CDCl}_3$ ) major diastereomer  $\delta$  7.99 (d,  $J$  = 7.5 Hz, 2H), 7.66 (dd,  $J$  = 10.5, 8.1 Hz, 1H), 7.60 – 7.50 (m, 3H), 7.44 (dt,  $J$  = 19.7, 7.6 Hz, 3H), 7.38 – 7.33 (m, 2H), 7.30 – 7.20 (m, 1H), 7.16 (s, 1H), 7.11 (d,  $J$  = 7.1 Hz, 2H), 4.20 – 4.05 (m, 2H), 3.99 – 3.78 (m, 3H), 1.29 (t,  $J$  = 7.0 Hz, 3H).  $^{13}\text{C}$  NMR (101 MHz,  $\text{CDCl}_3$ )  $\delta$  196.8 (d,  $J$  = 12.9 Hz), 136.7, 135.5 (d,  $J$  = 3.3 Hz), 133.2, 132.2 (d,  $J$  = 3.1 Hz), 132.1 (d,  $J$  = 3.5 Hz), 129.7, 129.4 (d,  $J$  = 6.2 Hz), 128.6, 128.2 (d,  $J$  = 2.5 Hz), 128.1, 128.0, 126.9 (d,  $J$  = 3.2 Hz), 61.2 (d,  $J$  = 6.8 Hz), 42.1 (d,  $J$  = 98.2 Hz), 37.8 (d,  $J$  = 1.8 Hz), 16.4 (d,  $J$  = 6.3 Hz).  $^{31}\text{P}$  NMR (162 MHz,  $\text{CDCl}_3$ )  $\delta$  43.7 HRMS-

ESI (m/z) calc for  $\text{C}_{23}\text{H}_{23}\text{O}_3\text{P}$  [ $\text{M}^+$  H] $^+$ :379.1458 found 379.1453 and  $\text{C}_{23}\text{H}_{23}\text{O}_3\text{PNa}^+$  [ $\text{M}^+$  Na] $^+$ :401.1277 found 401.1259.

*(3R,5R,7R)*-Adamantan-1-yl (*S*)-(*R*)-1-(naphthalen-1-yl)-3-oxo-3-phenylpropyl (phenyl)phosphinate (**3o**)

Yield: 141 mg, 73%; white solid (10:1 dr)

General procedure **A** was followed.

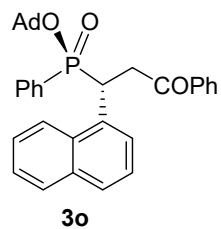

$^1\text{H}$  NMR (400 MHz,  $\text{CDCl}_3$ )  $\delta$  8.07 (d,  $J$  = 8.0 Hz, 1H), 8.01 – 7.97 (m, 2H), 7.69 – 7.64 (m, 2H), 7.60 (d,  $J$  = 8.2 Hz, 1H), 7.58 – 7.53 (m, 1H), 7.45 (t,  $J$  = 7.9 Hz, 4H), 7.34 (t,  $J$  = 7.3 Hz, 3H), 7.21 (t,  $J$  = 6.9 Hz, 1H), 7.10 (td,  $J$  = 7.5, 3.5 Hz, 2H), 4.98 (ddd,  $J$  = 17.5, 8.8, 4.2 Hz, 1H), 4.08 (ddd,  $J$  = 17.6, 11.1, 4.2 Hz, 1H), 3.85 (dt,  $J$  = 17.7, 8.8 Hz, 1H), 2.09 (s, 3H), 2.00 (s, 6H), 1.56 (s, 6H).  $^{13}\text{C}$  NMR (101 MHz,  $\text{CDCl}_3$ )  $\delta$  197.2 (d,  $J$  = 11.9 Hz), 136.8, 133.5, 133.1, 133.0, 132.2 (d,  $J$  = 6.7 Hz), 131.9 (d,  $J$  = 9.4 Hz), 131.7, 131.4 (d,  $J$  = 2.8 Hz), 128.6, 128.3, 128.2, 127.5 (d,  $J$  = 12.5 Hz), 127.4, 126.3 (d,  $J$  = 5.9 Hz), 125.3, 125.1, 124.9 (d,  $J$  = 3.6 Hz), 123.6, 83.1 (d,  $J$  = 9.8 Hz), 44.4 (d,  $J$  = 3.8 Hz), 39.3, 36.7 (d,  $J$  = 100.5 Hz), 35.7, 31.1.  $^{31}\text{P}$  NMR (162

MHz,  $\text{CDCl}_3$ )  $\delta$  38.7 HRMS-ESI (m/z) calc for  $\text{C}_{35}\text{H}_{35}\text{O}_3\text{P}$  [ $\text{M}^+$  H] $^+$ :555.2397 found 555.2414 and  $\text{C}_{35}\text{H}_{35}\text{O}_3\text{PNa}^+$  [ $\text{M}^+$  Na] $^+$ :557.2216 found 557.2232.

**(3*R*,5*R*,7*R*)-Adamantan-1-yl (S)-((*R*)-1-(anthracen-9-yl)-3-oxo-3-phenylpropyl)(phenyl)phosphinate (**3p**)**

Yield: 137 mg, 65%; yellow solid (6:1 dr)

General procedure **A** was followed.

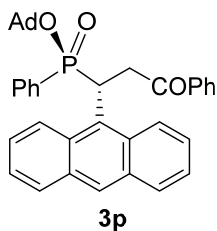

$^1\text{H NMR}$  (400 MHz,  $\text{CDCl}_3$ )  $\delta$  9.05 (d,  $J = 9.0$  Hz, 1H), 8.46 (d,  $J = 9.1$  Hz, 1H), 8.19 (d,  $J = 2.6$  Hz, 1H), 7.99 (dd,  $J = 8.4, 1.2$  Hz, 2H), 7.89 (d,  $J = 8.4$  Hz, 1H), 7.80 (d,  $J = 8.3$  Hz, 1H), 7.67 – 7.58 (m, 1H), 7.58 – 7.50 (m, 1H), 7.50 – 7.30 (m, 7H), 7.03 (td,  $J = 7.4, 1.3$  Hz, 1H), 6.88 (td,  $J = 7.7, 3.5$  Hz, 2H), 5.96 (dt,  $J = 22.6, 5.2$  Hz, 1H), 4.62 (ddd,  $J = 18.4, 15.6, 4.6$  Hz, 1H), 3.98 (ddd,  $J = 18.3, 9.2, 5.8$  Hz, 1H), 2.10 (s, 3H), 2.08 (s, 6H), 1.58 (s, 6H).  $^{13}\text{C NMR}$  (101 MHz,  $\text{CDCl}_3$ )  $\delta$  197.2 (d,  $J = 7.8$  Hz), 136.7, 133.1, 131.9, 131.7 (d,  $J = 3.7$  Hz), 131.3 (d,  $J = 9.7$  Hz), 131.2 (d,  $J = 2.8$  Hz), 131.0 (d,  $J = 8.9$  Hz), 130.5 (d,  $J = 4.8$  Hz), 130.1 (d,  $J = 1.9$  Hz), 128.9 (d,  $J = 3.0$  Hz), 128.4 (d,  $J = 36.8$  Hz), 127.72, 127.2 (d,  $J = 12.7$  Hz), 125.5 (d,  $J = 52.1$  Hz), 124.7, 124.4, 83.0 (d,  $J = 9.6$  Hz), 44.5 (d,  $J = 3.8$  Hz), 39.8 (d,  $J = 2.7$  Hz), 36.7 (d,  $J = 99.7$  Hz), 35.8, 31.2.  $^{31}\text{P NMR}$  (162 MHz,  $\text{CDCl}_3$ )  $\delta$  40.4 HRMS-ESI (m/z) calc for  $\text{C}_{39}\text{H}_{37}\text{O}_3\text{P}$  [ $\text{M} + \text{H}$ ] $^+$ :585.2553 found 585.2547 and  $\text{C}_{35}\text{H}_{37}\text{O}_3\text{P Na}^+$  [ $\text{M} + \text{Na}$ ] $^+$ :607.2373 found 607.2387.

**(3*R*,5*R*,7*R*)-Adamantan-1-yl (S)-((*R*)-1-(4-methoxyphenyl)-3-oxo-3-phenylpropyl)(phenyl)phosphinate (**3q**)**

Yield: 109 mg, 59%; gummy liquid (3:1 dr) (Inseparable diastereomers)

General procedure **A** was followed.

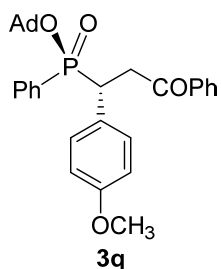

$^1\text{H NMR}$  (400 MHz,  $\text{CDCl}_3$ ) major diastereomer  $\delta$  8.00 – 7.97 (m, 2H), 7.58 (s, 1H), 7.57 – 7.53 (m, 2H), 7.49 – 7.40 (m, 4H), 7.35 – 7.31 (m, 1H), 7.04 (dd,  $J = 8.8, 2.3$  Hz, 2H), 6.63 (d,  $J = 8.4$  Hz, 2H), 3.90 (ddd,  $J = 16.1, 9.5, 3.9$  Hz, 1H), 3.86 – 3.80 (m, 1H), 3.78 (t,  $J = 2.0$  Hz, 1H), 3.69 (s, 3H), 2.09 (s, 3H), 2.01 (s, 6H), 1.56 (t,  $J = 2.9$  Hz, 6H).  $^{13}\text{C NMR}$  (101 MHz,  $\text{CDCl}_3$ )  $\delta$  197.3 (d,  $J = 13.2$  Hz), 158.3 (d,  $J = 2.9$  Hz), 136.9, 133.1, 131.9 (d,  $J = 9.3$  Hz), 131.6 (d,  $J = 2.5$  Hz), 130.5 (d,  $J = 6.2$  Hz), 128.6, 128.5, 128.2, 127.9 (d,  $J = 11.8$  Hz), 127.8, 113.5, 82.8 (d,  $J = 10.0$  Hz), 55.0, 44.5 (d,  $J = 3.7$  Hz), 42.4 (d,  $J = 101.2$  Hz), 37.9, 35.7, 31.1.  $^{31}\text{P NMR}$  (162 MHz,  $\text{CDCl}_3$ )  $\delta$  38.5 HRMS-ESI (m/z) calc for  $\text{C}_{32}\text{H}_{35}\text{O}_4\text{P}$  [ $\text{M} + \text{H}$ ] $^+$ :515.2346 found 515.2335 and  $\text{C}_{32}\text{H}_{35}\text{O}_4\text{P Na}^+$  [ $\text{M} + \text{Na}$ ] $^+$ :537.2165 found 537.2139.

**(3*R*,5*R*,7*R*)-Adamantan-1-yl (S)-((*R*)-1-(4-cyanophenyl)-3-oxo-3-phenylpropyl)(phenyl)phosphinate (**3r**)**

Yield: 112 mg, 61% gummy liquid (2:1 dr)

General procedure **A** was followed.

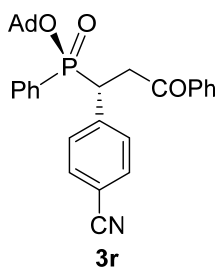

$^1\text{H NMR}$  (400 MHz,  $\text{CDCl}_3$ )  $\delta$  7.97 (dd,  $J = 8.4, 1.3$  Hz, 2H), 7.63 – 7.58 (m, 1H), 7.56 – 7.44 (m, 5H), 7.40 – 7.31 (m, 4H), 7.24 (dd,  $J = 8.4, 2.1$  Hz, 2H), 3.98 (ddd,  $J = 16.3, 9.5, 4.1$  Hz, 1H), 3.88 – 3.79 (m, 2H), 2.12 (s, 3H), 2.02 (s, 6H), 1.58 (s, 6H).  $^{13}\text{C NMR}$  (101 MHz,  $\text{CDCl}_3$ )  $\delta$  196.6 (d,  $J = 13.1$  Hz), 142.06 (d,  $J = 2.7$  Hz), 136.5, 133.5, 132.7 (d,  $J = 25.7$  Hz), 132.1 (d,  $J = 3.0$  Hz), 131.8, 131.7 (d,  $J = 2.6$  Hz), 130.2 (d,  $J = 6.0$  Hz), 128.7, 128.5 (d,  $J = 12.6$  Hz), 128.1, 118.8 (d,  $J = 2.0$  Hz), 110.5 (d,  $J = 3.4$  Hz), 83.8 (d,  $J = 9.6$  Hz), 44.5 (d,  $J = 3.8$  Hz), 43.4 (d,  $J = 4.5$  Hz), 37.6 (d,  $J = 2.3$  Hz), 35.6, 31.2.  $^{31}\text{P NMR}$  (162 MHz,  $\text{CDCl}_3$ )  $\delta$  36.7 HRMS-ESI (m/z) calc for  $\text{C}_{32}\text{H}_{32}\text{NO}_3\text{P}$  [ $\text{M} + \text{H}$ ] $^+$ :510.2193 found 510.2181 and  $\text{C}_{32}\text{H}_{32}\text{NO}_3\text{PNa}^+$  [ $\text{M} + \text{Na}$ ] $^+$ :532.2012 found 532.2013.

*(3R,5R,7R)*-Adamantan-1-yl (*S*)-(*R*)-3-(naphthalen-1-yl)-3-oxo-1-phenylpropyl(phenyl)phosphinate (**3s**)

Yield: 140 mg, 73% white solid, 5:1 dr

General procedure **A** was followed.

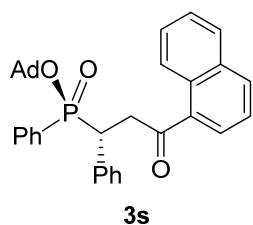

$^1\text{H}$  NMR (400 MHz,  $\text{CDCl}_3$ )  $\delta$  8.57 (s, 1H), 8.04 – 8.00 (m, 2H), 7.89 (d,  $J = 8.8$  Hz, 2H), 7.65 – 7.54 (m, 4H), 7.46 – 7.40 (m, 1H), 7.35 – 7.31 (m, 2H), 7.19 – 7.14 (m, 2H), 7.08 (ddd,  $J = 10.7, 3.1, 1.8$  Hz, 3H), 4.07 – 4.00 (m, 1H), 3.97 (dt,  $J = 7.5, 4.4$  Hz, 2H), 2.10 (s, 3H), 2.04 (s, 6H), 1.57 (s, 6H).  $^{13}\text{C}$  NMR (101 MHz,  $\text{CDCl}_3$ )  $\delta$  197.4 (d,  $J = 13.1$  Hz), 135.9 (d,  $J = 2.7$  Hz), 135.6, 134.2, 133.2, 132.5, 132.0, 131.97, 131.92, 131.6 (d,  $J = 2.8$  Hz), 129.8 (d,  $J = 36.4$  Hz), 129.5 (d,  $J = 6.2$  Hz), 128.5 (d,  $J = 12.2$  Hz), 128.0 (d,  $J = 2.5$  Hz), 127.9, 127.8 (d,  $J = 5.2$  Hz), 126.8, 126.7 (d,  $J = 3.2$  Hz), 123.9, 83.0 (d,  $J = 9.8$  Hz), 44.5 (d,  $J = 3.8$  Hz), 43.4 (d,  $J = 100.2$  Hz), 37.9 (d,  $J = 2.1$  Hz), 35.7, 31.1 (d,  $J = 7.1$  Hz).  $^{31}\text{P}$  NMR (162 MHz,  $\text{CDCl}_3$ )  $\delta$  38.6 HRMS-

ESI (m/z) calc for  $\text{C}_{35}\text{H}_{35}\text{O}_3\text{P}$  [ $\text{M} + \text{H}$ ] $^+$ : 535.2397 found 535.2395 and  $\text{C}_{35}\text{H}_{35}\text{O}_3\text{P}$   $\text{Na}^+$  [ $\text{M} + \text{Na}$ ] $^+$ : 557.2216 found 557.2200.

*(3R,5R,7R)*-Adamantan-1-yl (*S*)-(*R*)-3-oxo-1-phenylbutyl(phenyl)phosphinate (**3t**)

Yield: 78 mg, 51%; gummy liquid (5:1 dr)

General procedure **A** was followed.

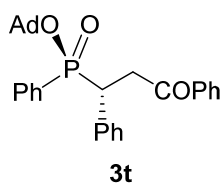

$^1\text{H}$  NMR (400 MHz,  $\text{CDCl}_3$ )  $\delta$  7.52 – 7.46 (m, 2H), 7.44 – 7.37 (m, 1H), 7.28 (td,  $J = 7.8, 3.4$  Hz, 2H), 7.09 (dd,  $J = 5.2, 1.4$  Hz, 3H), 7.03 (dd,  $J = 7.1, 2.4$  Hz, 2H), 3.73 (ddd,  $J = 17.3, 9.8, 4.2$  Hz, 1H), 3.29 (ddd,  $J = 17.3, 10.4, 4.2$  Hz, 1H), 3.23 – 3.09 (m, 1H), 2.10 (s, 6H), 2.01 (s, 6H), 1.58 (s, 6H).  $^{13}\text{C}$  NMR (101 MHz,  $\text{CDCl}_3$ )  $\delta$  205.7 (d,  $J = 13.0$  Hz), 135.6 (d,  $J = 3.2$  Hz), 132.8, 131.9 (d,  $J = 9.4$  Hz), 131.7 (d,  $J = 2.8$  Hz), 129.3 (d,  $J = 6.0$  Hz), 128.0 (d,  $J = 2.6$  Hz), 127.8 (d,  $J = 12.6$  Hz), 126.7 (d,  $J = 3.2$  Hz), 83.1 (d,  $J = 9.8$  Hz), 44.5 (d,  $J = 3.7$  Hz), 43.4 (d,  $J = 99.6$  Hz), 42.5 (d,  $J = 2.1$  Hz), 35.7, 31.1, 30.6.  $^{31}\text{P}$  NMR (162 MHz,  $\text{CDCl}_3$ )  $\delta$  38.0 HRMS-ESI (m/z) calc for  $\text{C}_{26}\text{H}_{31}\text{O}_3\text{P}$  [ $\text{M} + \text{H}$ ] $^+$ : 423.2084 found 423.2097 and  $\text{C}_{26}\text{H}_{31}\text{O}_3\text{P}$   $\text{Na}^+$  [ $\text{M} + \text{Na}$ ] $^+$ : 445.1903 found 445.1922.

*(1S,2R,5S)*-2-Isopropyl-5-methylcyclohexyl ((*R*)-4-oxo-2,4-diphenylbutan-2-yl)(phenyl)phosphinate (**5**)

Yield: 114 mg, 64%; gummy liquid (8:1 dr)

General procedure **A** was followed using **4**.

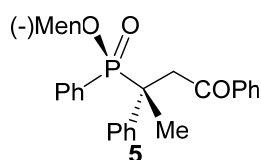

$^1\text{H}$  NMR (400 MHz,  $\text{CDCl}_3$ )  $\delta$  7.99 – 7.85 (m, 2H), 7.56 (ddd,  $J = 6.8, 4.0, 1.2$  Hz, 1H), 7.48 – 7.39 (m, 3H), 7.33 – 7.29 (m, 1H), 7.27 (d,  $J = 1.8$  Hz, 1H), 7.26 – 7.21 (m, 2H), 7.20 – 7.15 (m, 2H), 7.13 (dd,  $J = 4.6, 2.3$  Hz, 3H), 4.57 – 4.36 (m, 2H), 3.56 (dd,  $J = 18.1, 5.0$  Hz, 1H), 2.55 – 2.40 (m, 1H), 1.86 (d,  $J = 16.0$  Hz, 4H), 1.78 – 1.70 (m, 1H), 1.70 – 1.61 (m, 1H), 1.54 (dd,  $J = 15.3, 7.6$  Hz, 1H), 1.42 – 1.30 (m, 1H), 1.15 – 1.06 (m, 1H), 1.02 (dd,  $J = 7.0, 3.1$  Hz, 6H), 0.97 – 0.78 (m, 2H), 0.75 (d,  $J = 6.5$  Hz, 3H).  $^{13}\text{C}$  NMR (101 MHz,  $\text{CDCl}_3$ )  $\delta$  196.2 (d,  $J = 17.1$  Hz), 138.6 (d,  $J = 3.6$  Hz), 137.6 (d,  $J = 2.4$  Hz), 133.2 (d,  $J = 8.5$  Hz), 133.0, 131.7 (d,  $J = 2.8$  Hz), 129.5 (d,  $J = 122.0$  Hz), 128.5, 127.85, 127.8, 127.6 (d,  $J = 3.1$  Hz), 127.3 (d,  $J = 12.1$  Hz), 126.3 (d,  $J = 3.6$  Hz), 49.0 (d,  $J = 6.0$  Hz), 44.1 (d,  $J = 92.0$  Hz), 43.3, 41.4, 34.0, 31.5, 25.7, 22.6, 21.9, 21.3, 19.2 (d,  $J = 3.8$  Hz), 15.6.  $^{31}\text{P}$  NMR (162 MHz,  $\text{CDCl}_3$ )  $\delta$  43.2 HRMS-ESI (m/z) calc for  $\text{C}_{32}\text{H}_{39}\text{O}_3\text{P}$  [ $\text{M} + \text{H}$ ] $^+$ : 503.2710 found 503.2700 and  $\text{C}_{32}\text{H}_{39}\text{O}_3\text{P}$   $\text{Na}^+$  [ $\text{M} + \text{Na}$ ] $^+$ : 525.2529

### Procedure for 6

In a flame dried reaction vial under argon, to compound **3c** (0.140 g, 0.28 mmol, 1.0 equiv) dissolved in methanol (1.40 mL) was added sodium borohydride (0.106 g, 2.81 mmol, 10.0 equiv) followed by stirring at room temperature



for 5 days. Solvents were evaporated, crude was diluted with EtOAc (10 mL) and water (5 mL). Separated organic layer was dried over Na<sub>2</sub>SO<sub>4</sub>, solvents were removed under vacuum, residue was purified using column chromatography and the pure diastereomer (petroleum ether/EtOAc=1:1) was isolated as a white solid.

*(3S,5S,7S)-Adamantan-1-yl (R)-((2R,4R)-4-hydroxy-2,4-diphenylbutan-2-yl)(phenyl)phosphinate (6)*

Yield: 39 mg, 80 % white solid (4:1 dr)

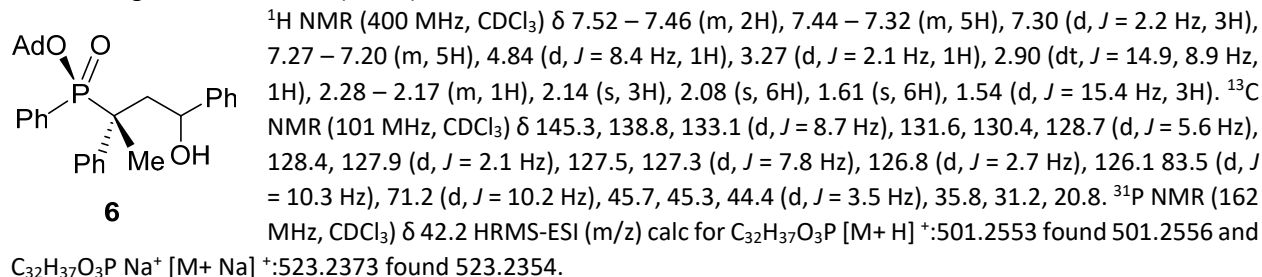

**Procedure for 7**

In a flame dried reaction vial under argon, compound **5** (0.075 g, 0.15 mmol, 1.0 equiv) was dissolved in 1,4-dioxane (1.50 mL); to it was added camphor sulfonic acid (0.035 g, 0.15 mmol, 1.0 equiv). The reaction was stirred at 70 °C for 4 days. The reaction mixture was diluted with EtOAc (15 mL) and washed the organic layer with Saturated NaHCO<sub>3</sub> (2 X 5 mL). The organic layer was dried over Na<sub>2</sub>SO<sub>4</sub>, and solvents were evaporated under vacuum. The crude was purified using column chromatography (petroleum ether/EtOAc=2:1) and further purified by prep TLC using 5% methanol/CH<sub>2</sub>Cl<sub>2</sub> to obtain the pure cyclized product as white solids.

*(2R,3R,5S)-3-Methyl-2,3,5-triphenyl-1,2-oxaphospholane 2-oxide (7)*

Yield: 25 mg, 49%; white solid

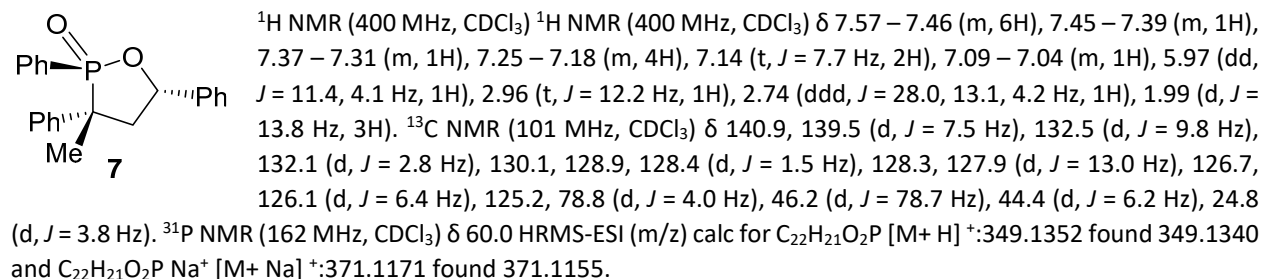

#### 4. X-Ray Crystallographic data for **3a**

General procedure for crystal culture of **3a**: In a small test tube **3a** (10 mg) was dissolved in dichloromethane (0.5 mL). This solution was placed in a jar filled with n-hexane (5.0 mL); the jar was then capped. This vial-within-jar set up was stored in a dry and ventilated place for three days to allow for crystal growth. One of the crystals produced was placed onto the tip of a MiTeGen loop and mounted on a Bruker Venture D8 diffractometer equipped with a Photon III detector at 123 (2) K for analysis.

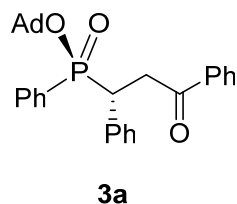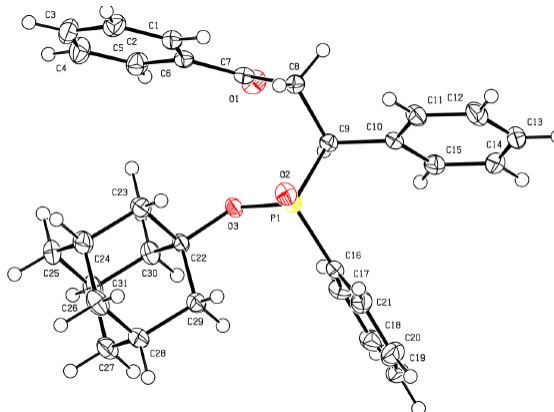

Bond precision: C-C = 0.0021 Å

Wavelength=0.71073

Cell: a=12.9448 (4) b=16.4183 (5) c=13.3984 (4)  
 alpha=90 beta=118.182 (1) gamma=90  
 Temperature: 123 K

|                        | Calculated   | Reported     |
|------------------------|--------------|--------------|
| Volume                 | 2510.01 (13) | 2510.01 (13) |
| Space group            | P 21/c       | P 21/c       |
| Hall group             | -P 2ybc      | -P 2ybc      |
| Moiety formula         | C31 H33 O3 P | ?            |
| Sum formula            | C31 H33 O3 P | C31 H33 O3 P |
| Mr                     | 484.54       | 484.54       |
| Dx, g cm <sup>-3</sup> | 1.282        | 1.282        |
| Z                      | 4            | 4            |
| Mu (mm <sup>-1</sup> ) | 0.141        | 0.141        |
| F000                   | 1032.0       | 1032.0       |
| F000'                  | 1032.83      |              |
| h, k, lmax             | 17, 21, 17   | 17, 21, 17   |
| Nref                   | 6245         | 6236         |
| Tmin, Tmax             | 0.968, 0.980 | 0.726, 0.744 |
| Tmin'                  | 0.963        |              |

Correction method= # Reported T Limits: Tmin=0.726 Tmax=0.744  
 AbsCorr = MULTI-SCAN

Data completeness= 0.999 Theta(max)= 28.320

R(reflections)= 0.0367( 5155) wR2(reflections)= 0.0935( 6236)

S = 1.035 Npar= 316

## 5. Copies of $^1\text{H}$ , $^{13}\text{C}$ and $^{31}\text{P}$ NMR spectra

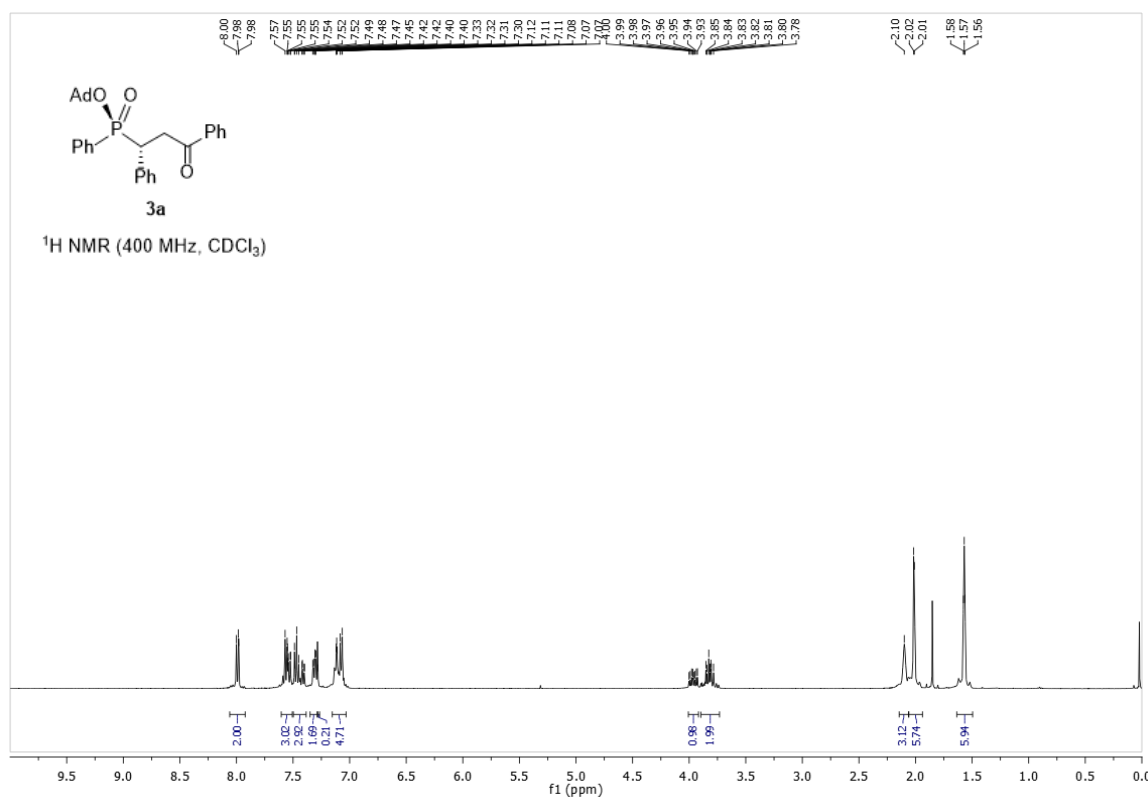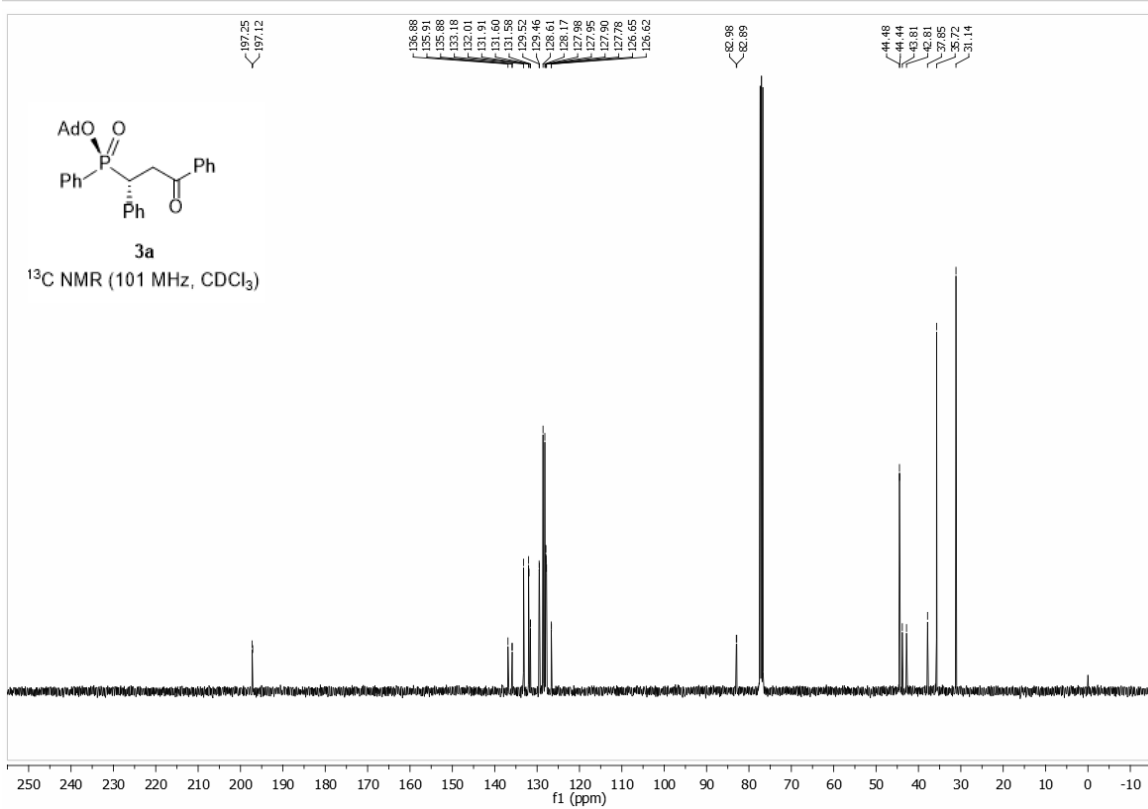

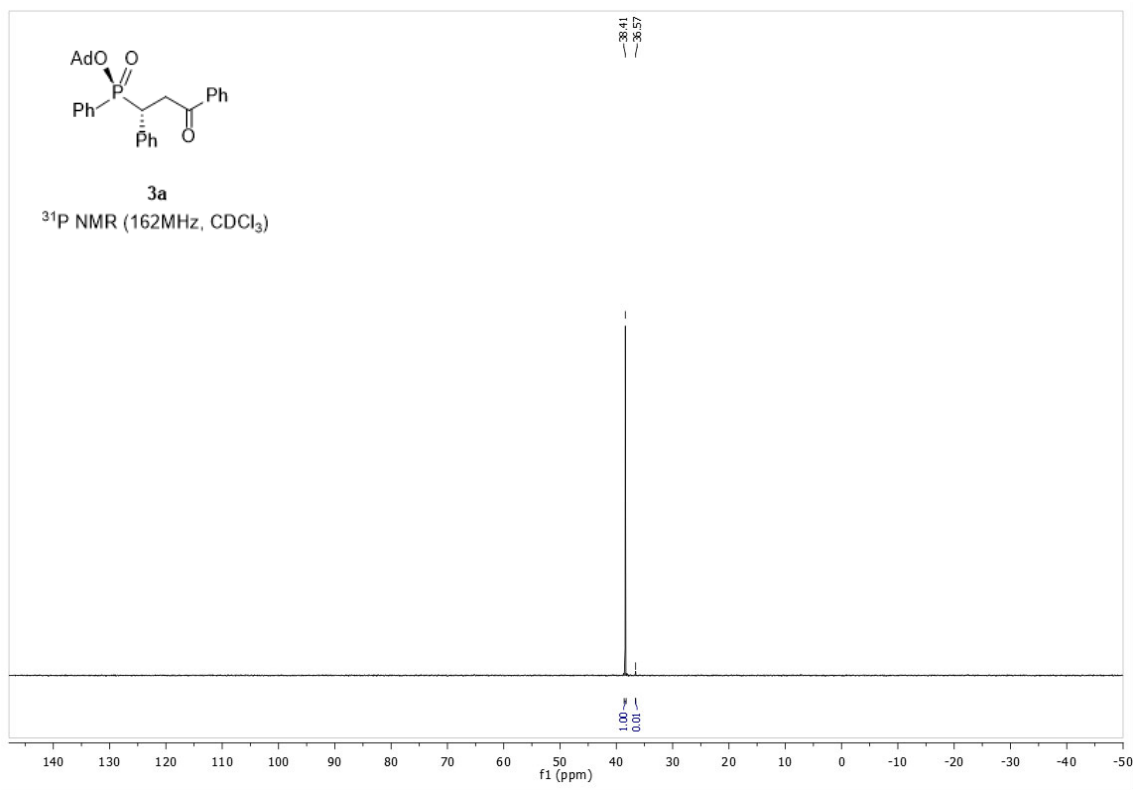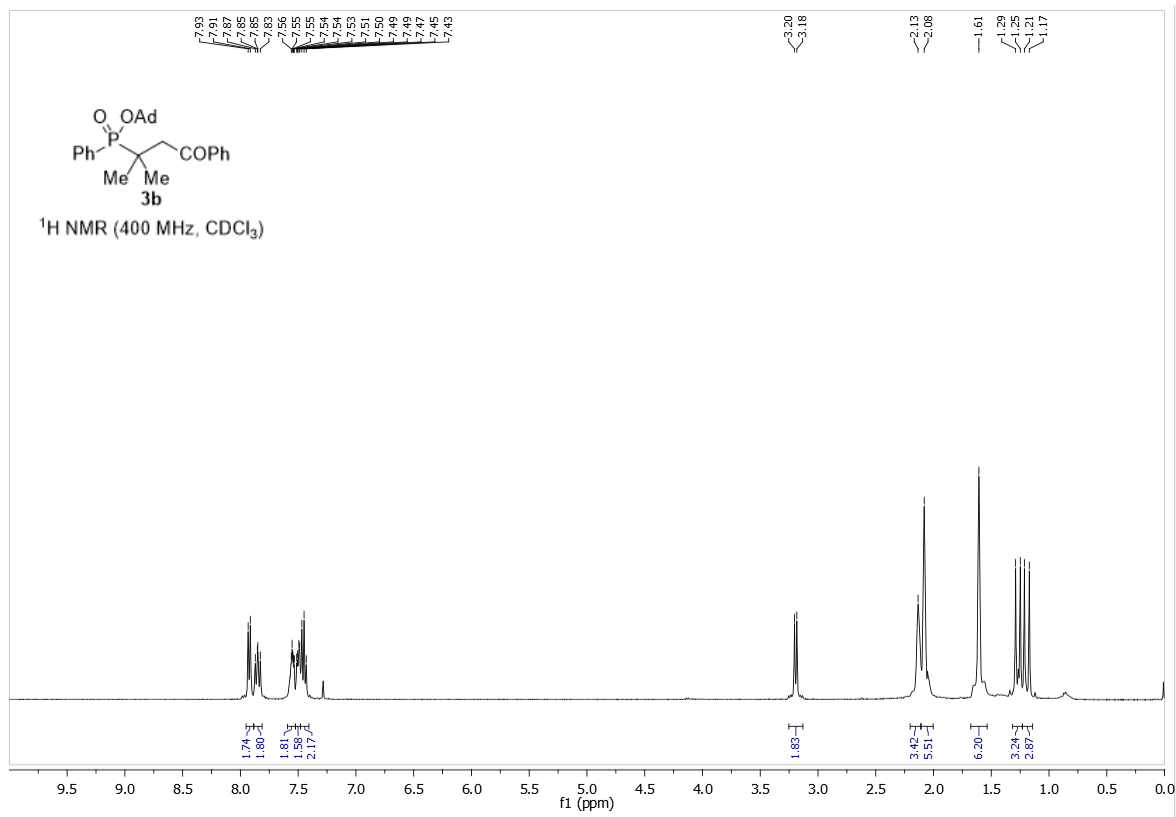

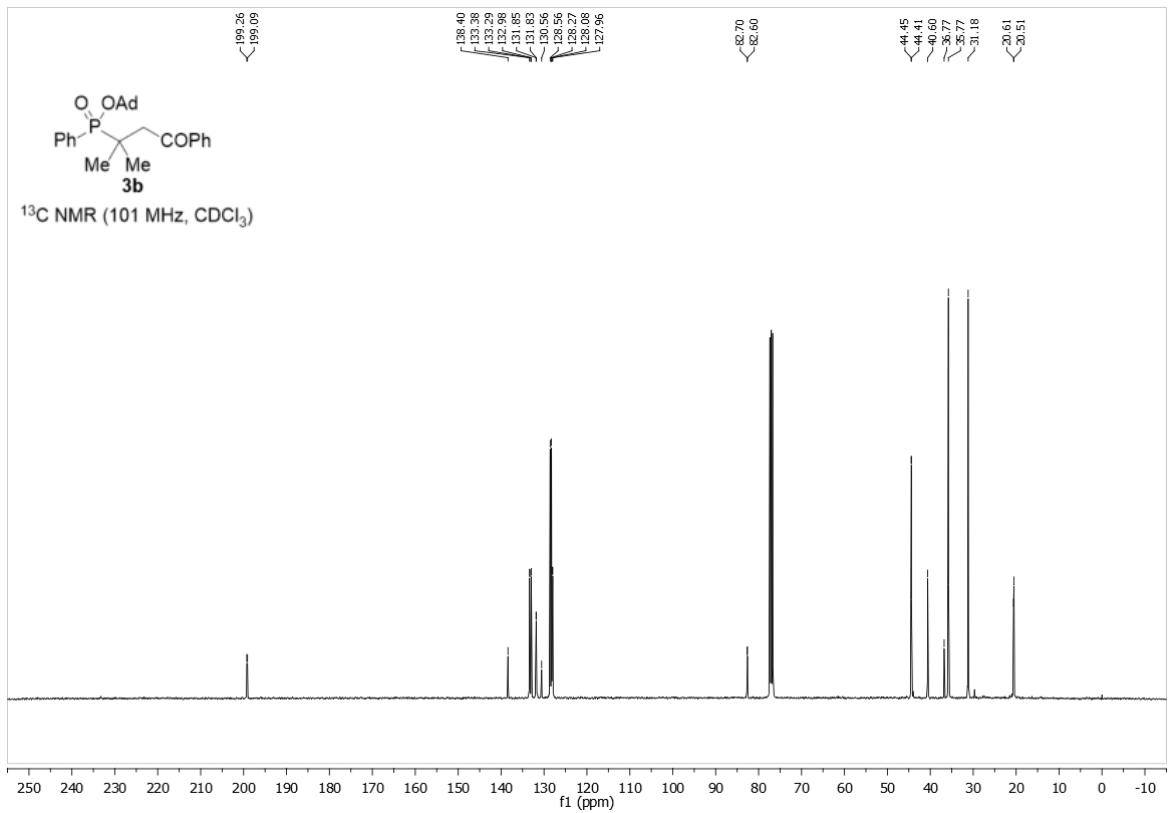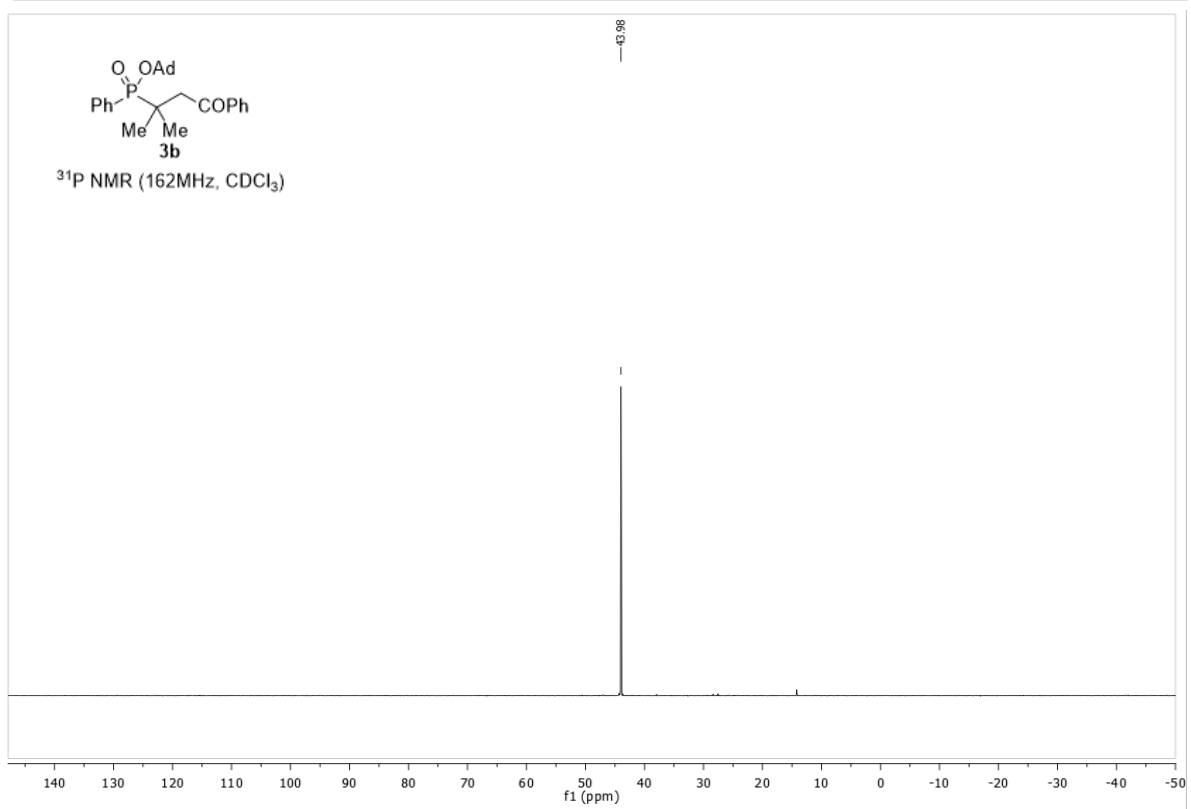

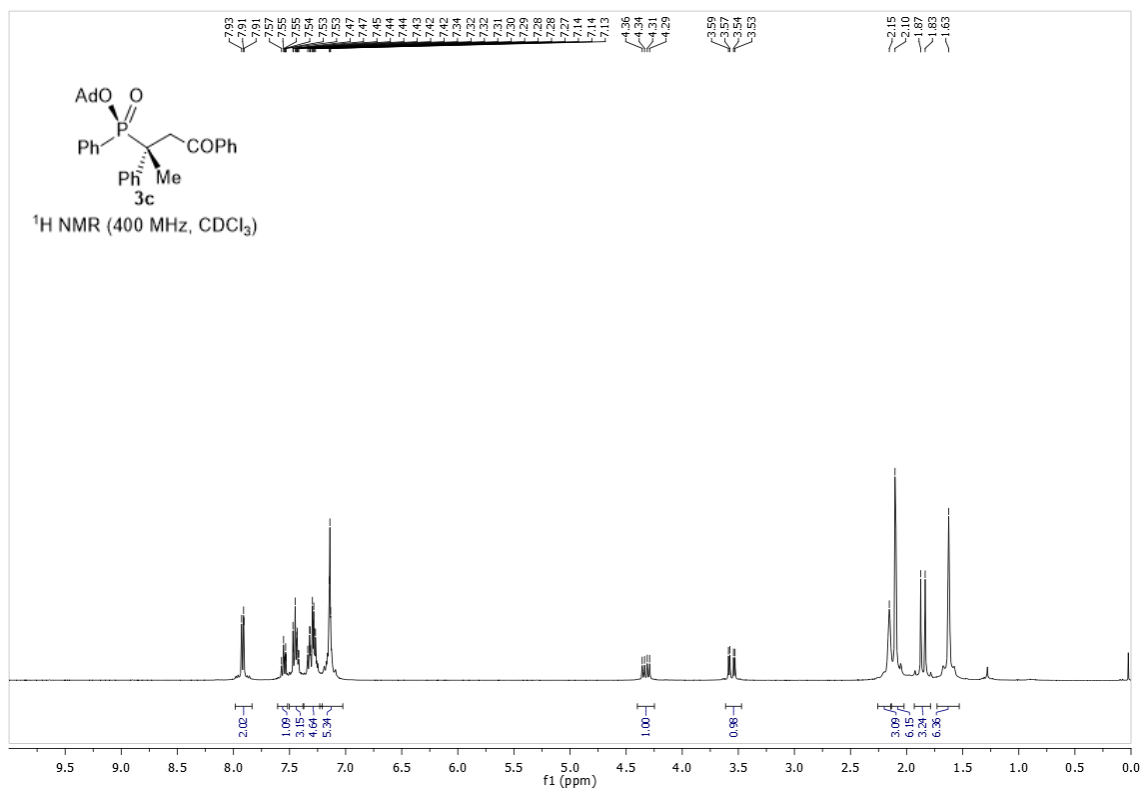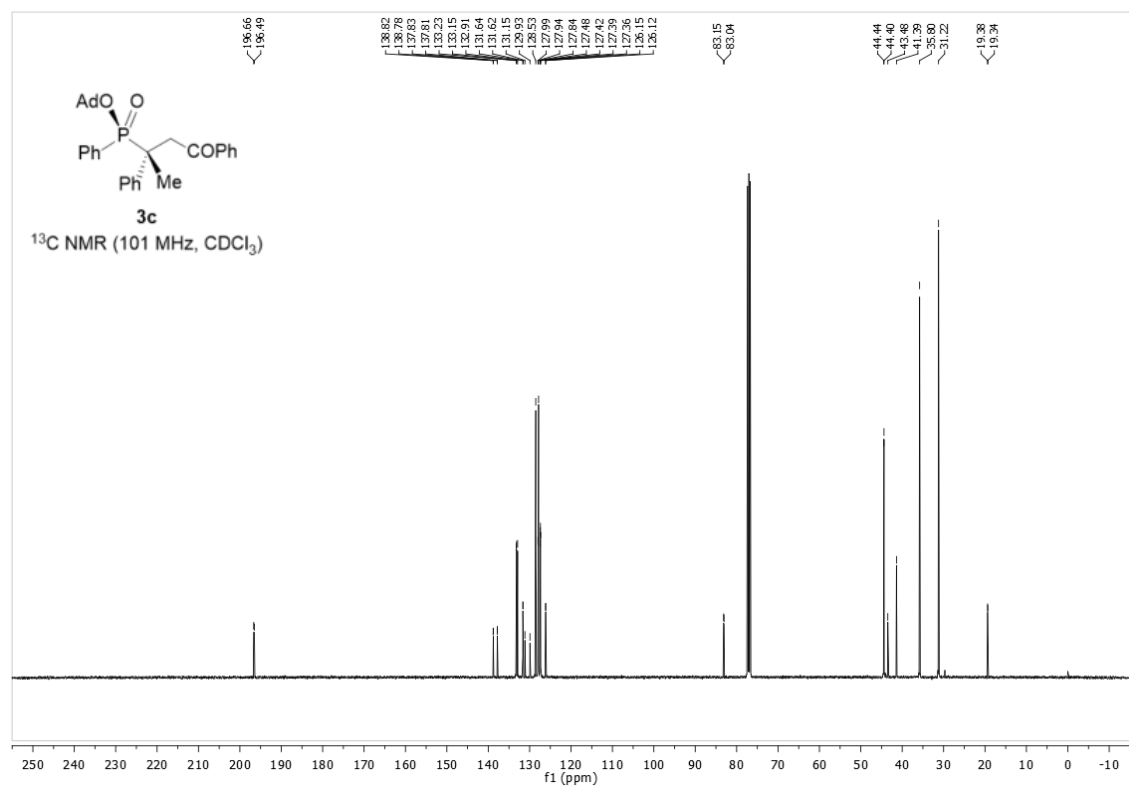

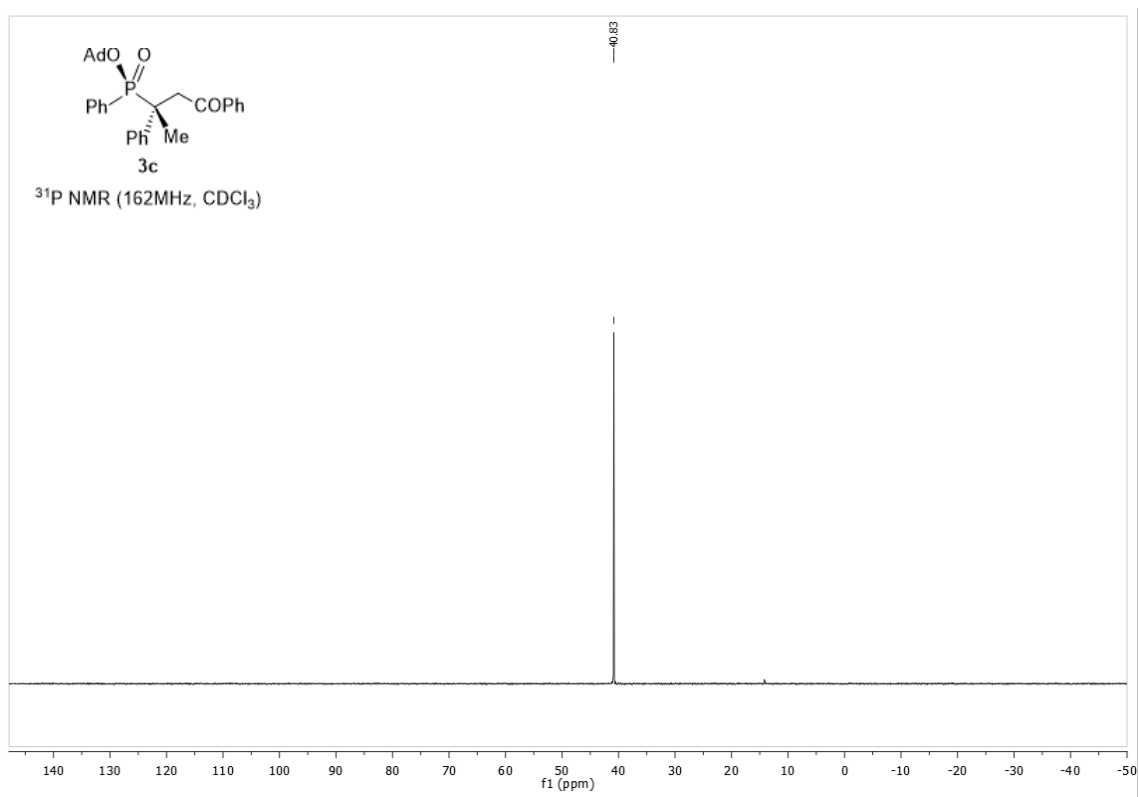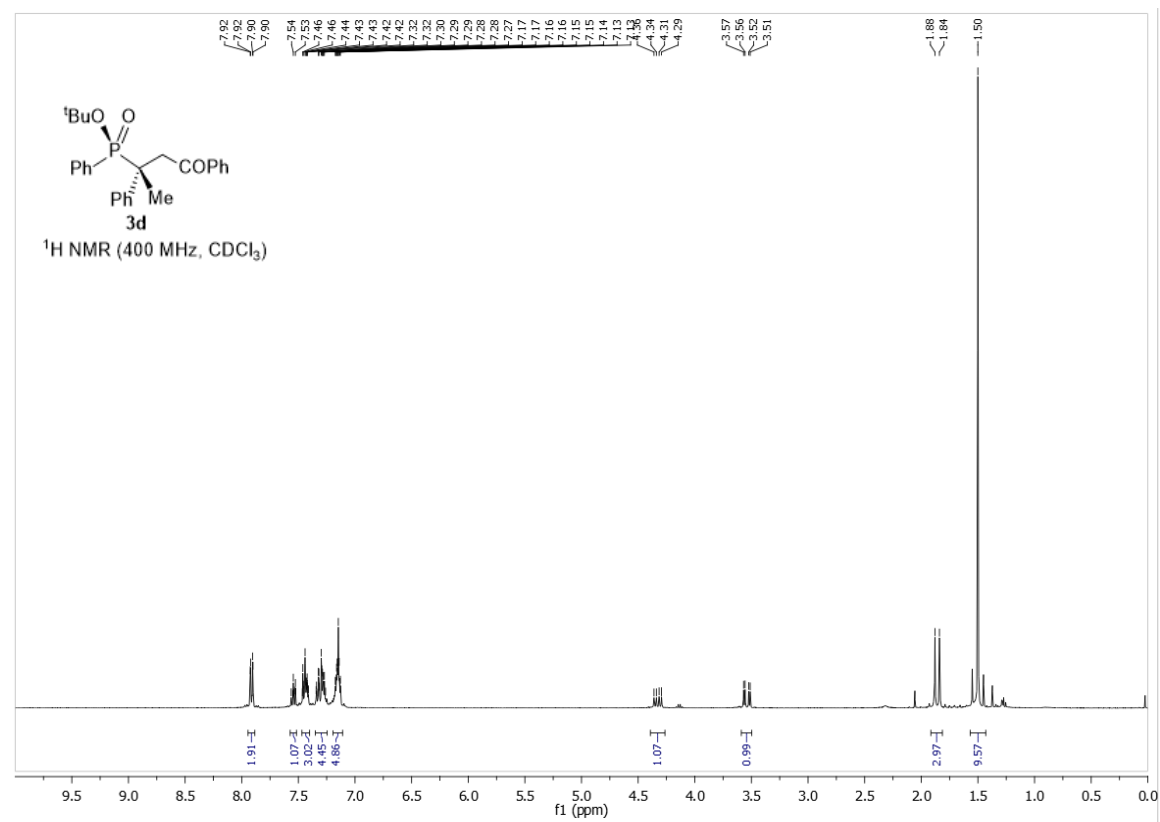

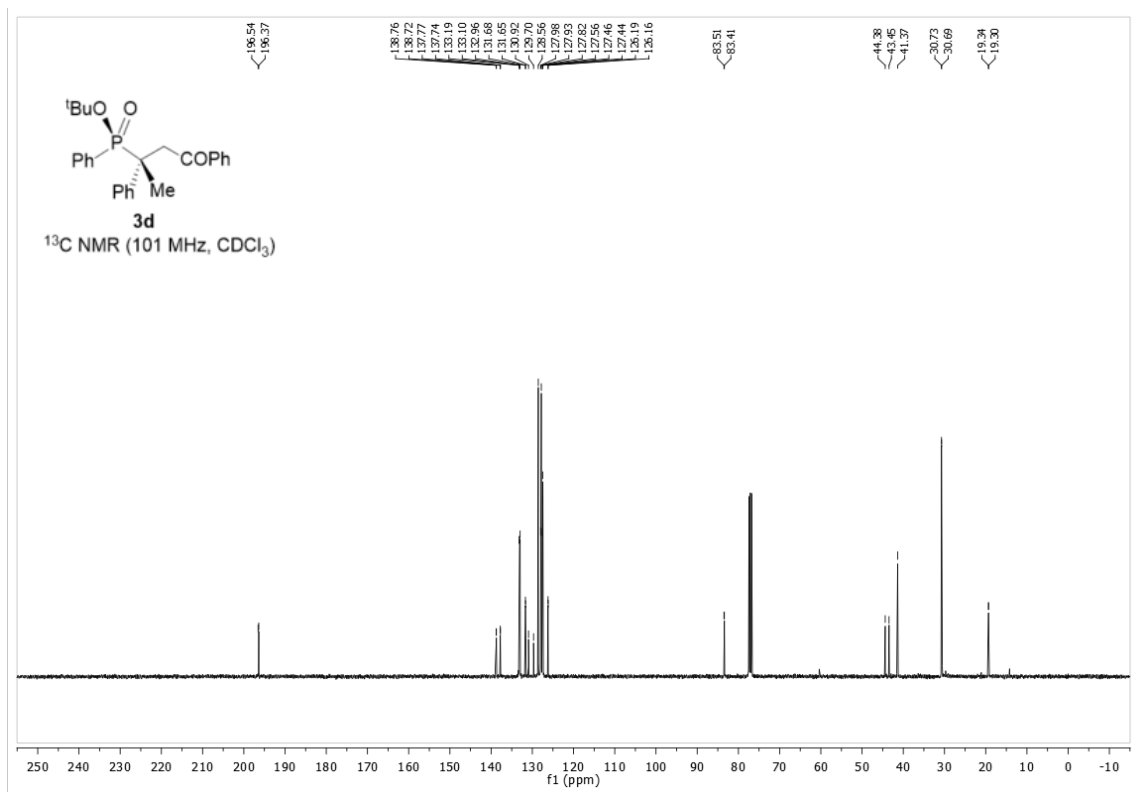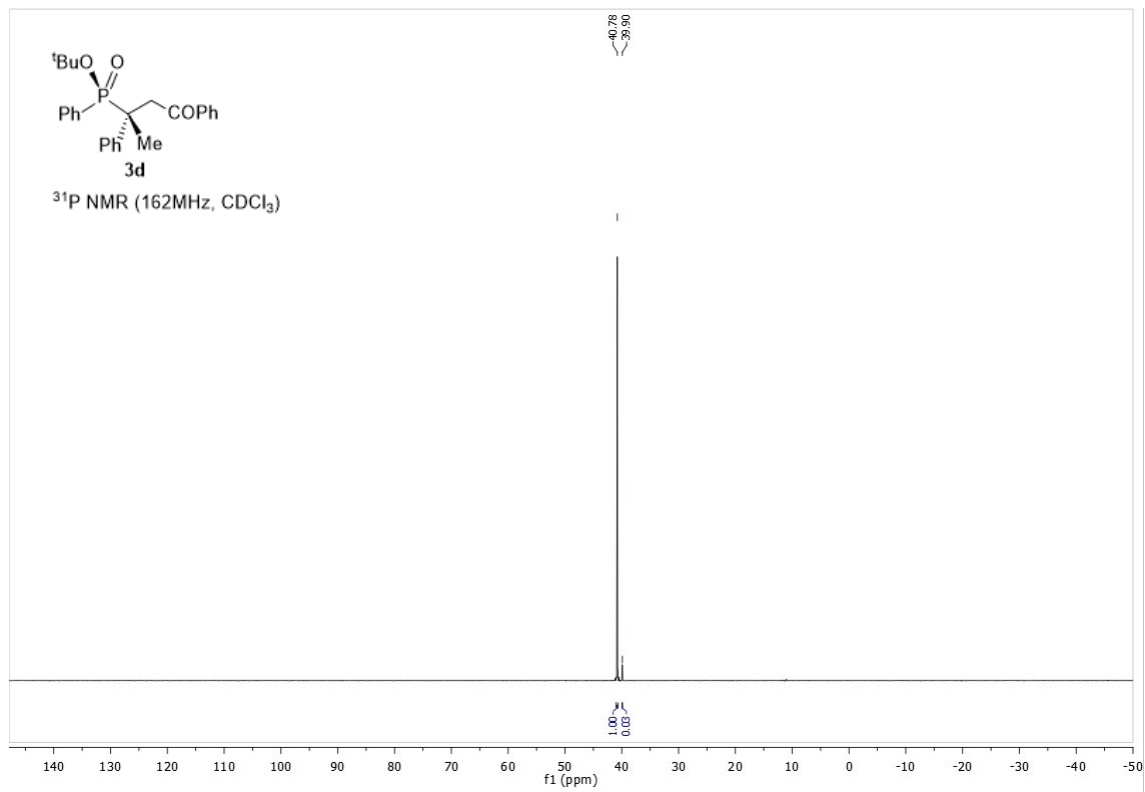



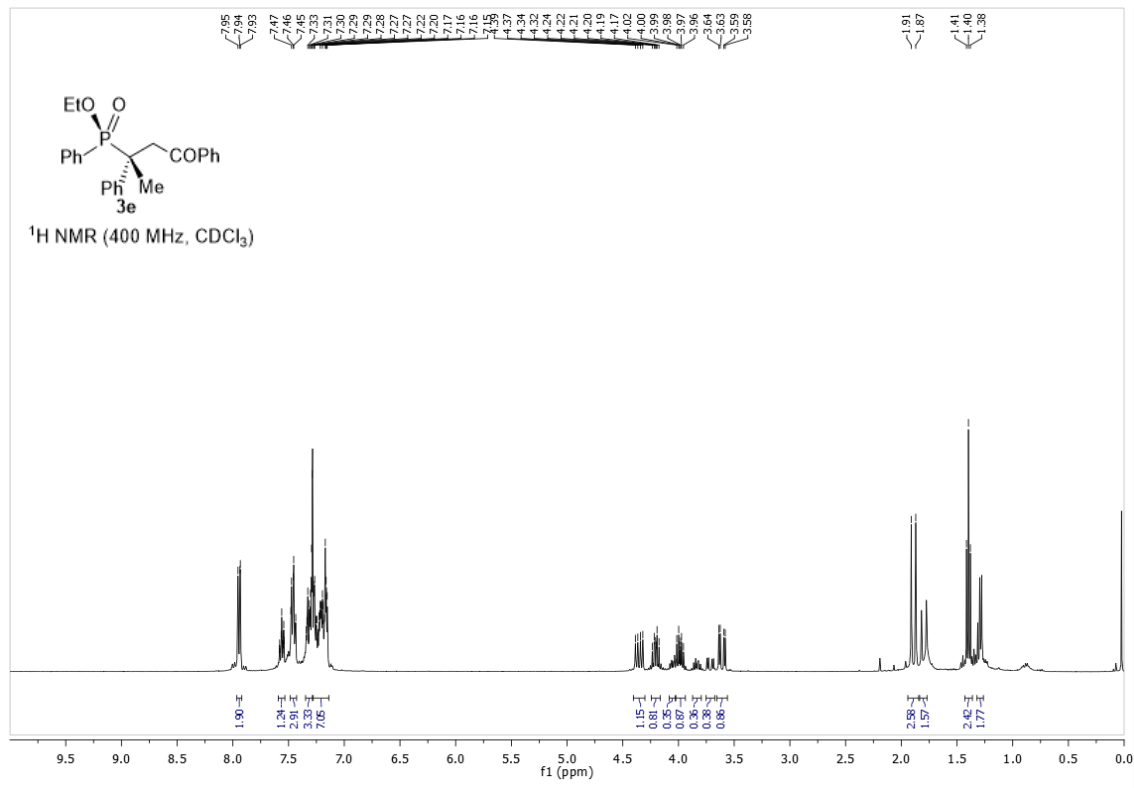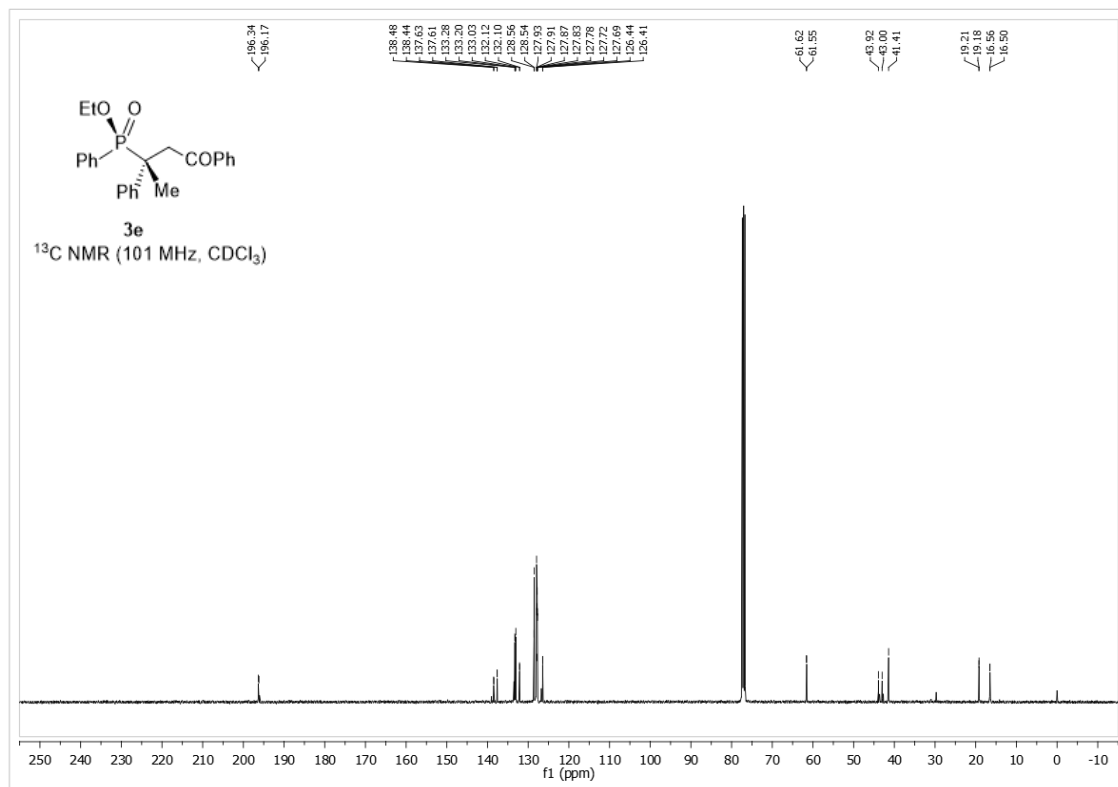

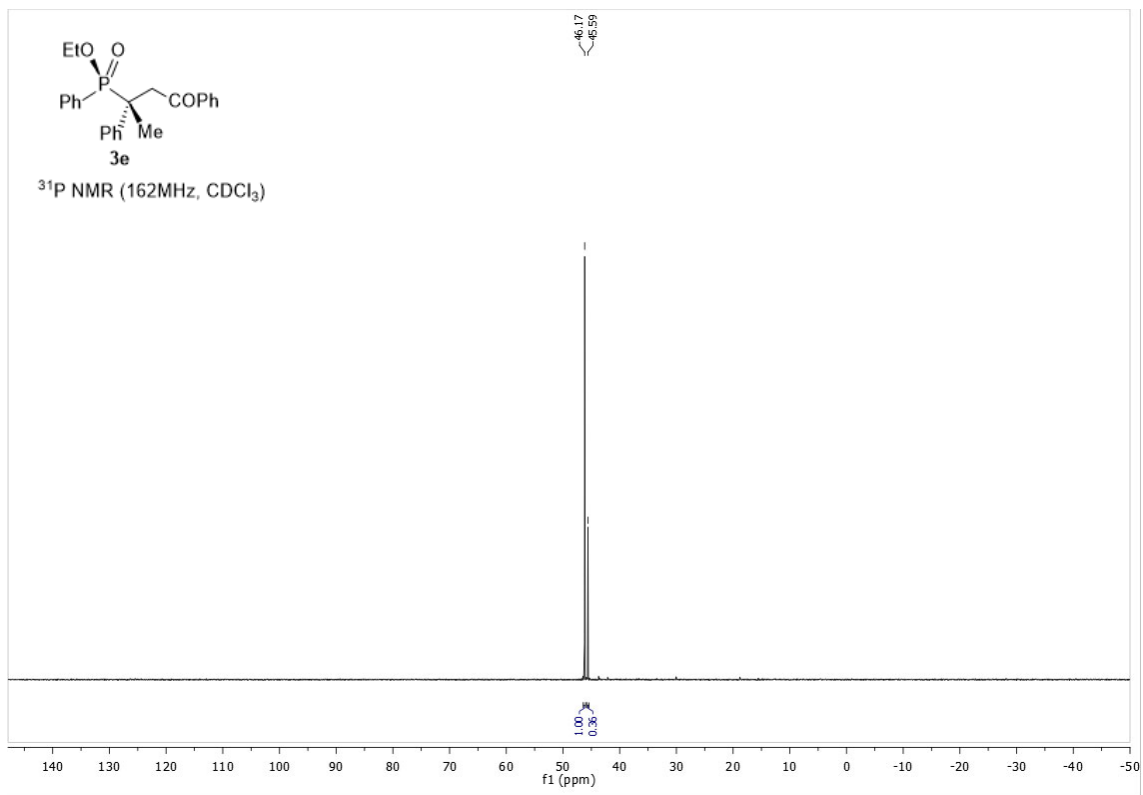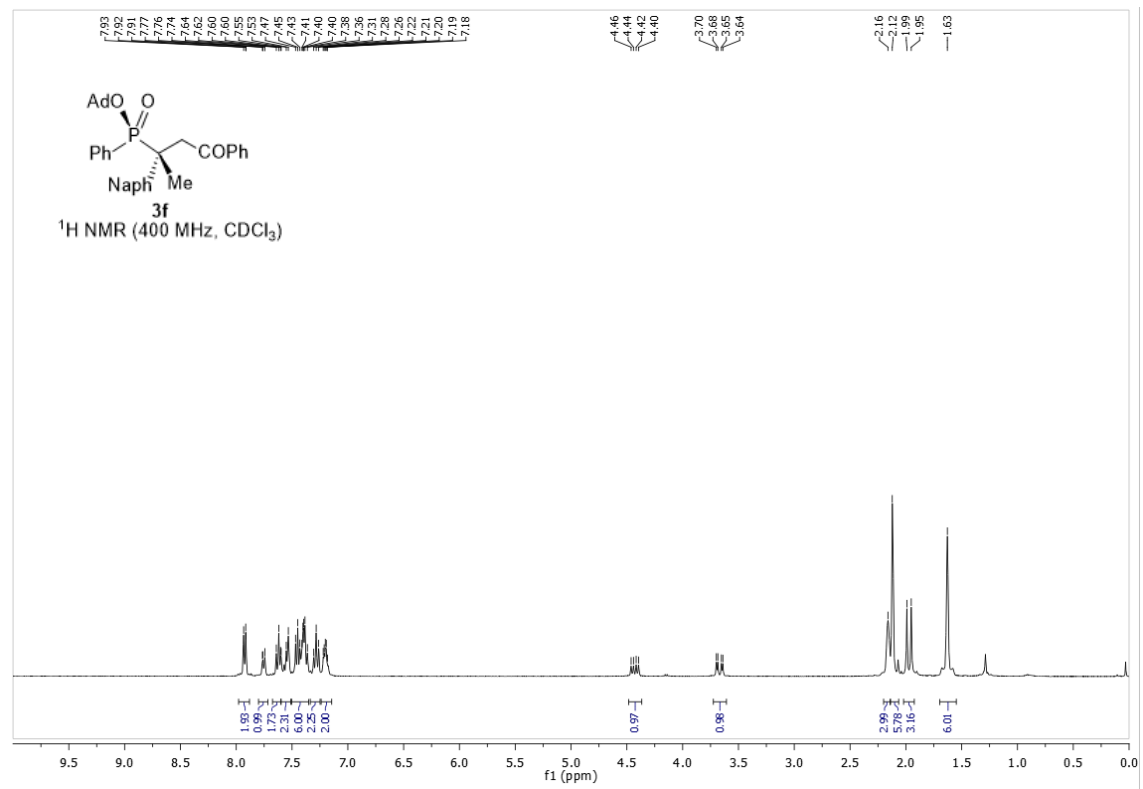

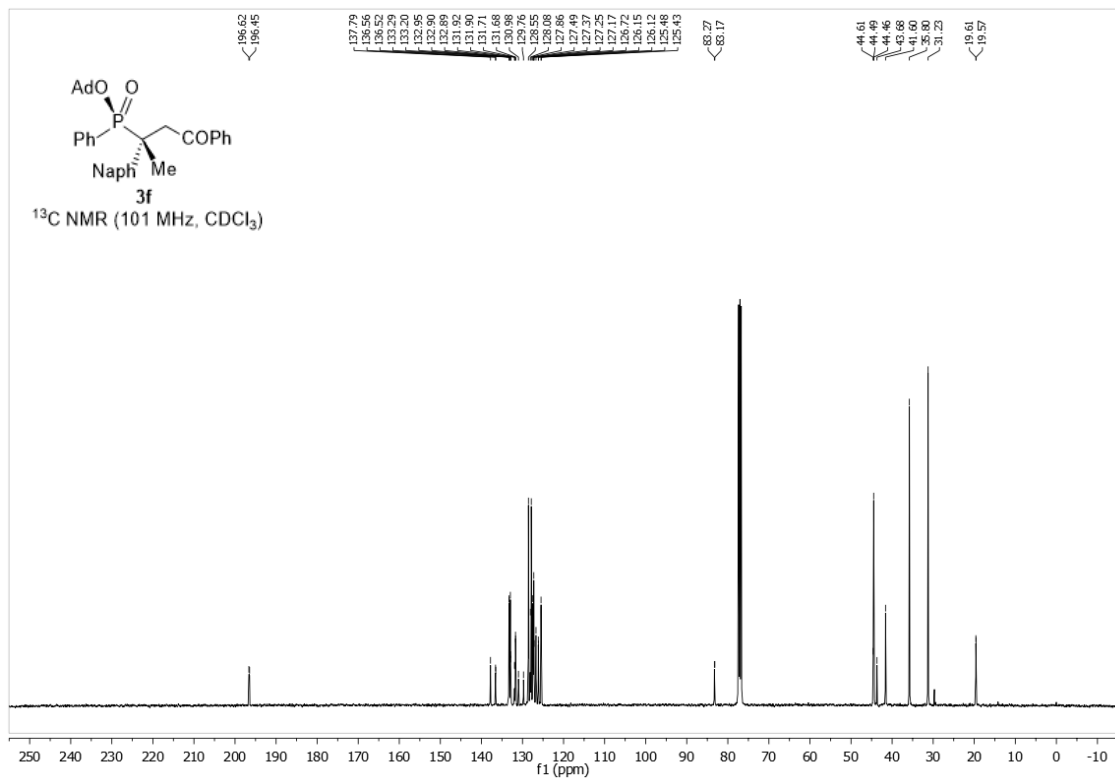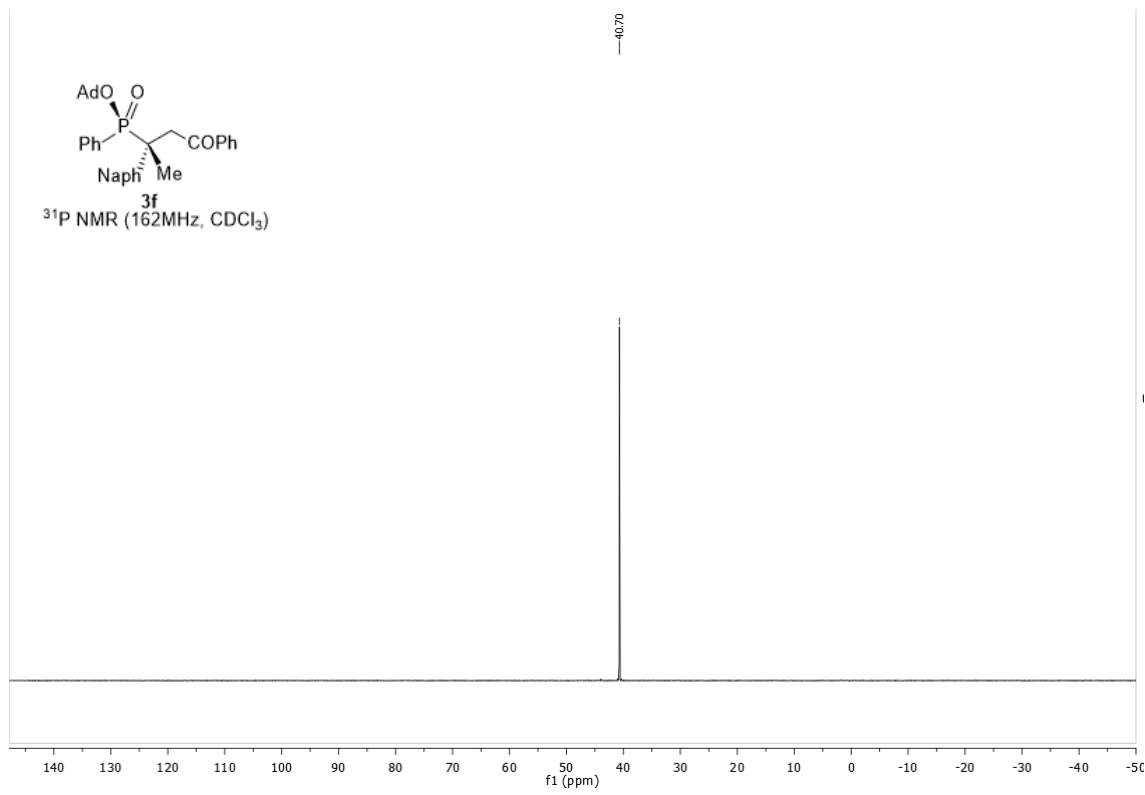

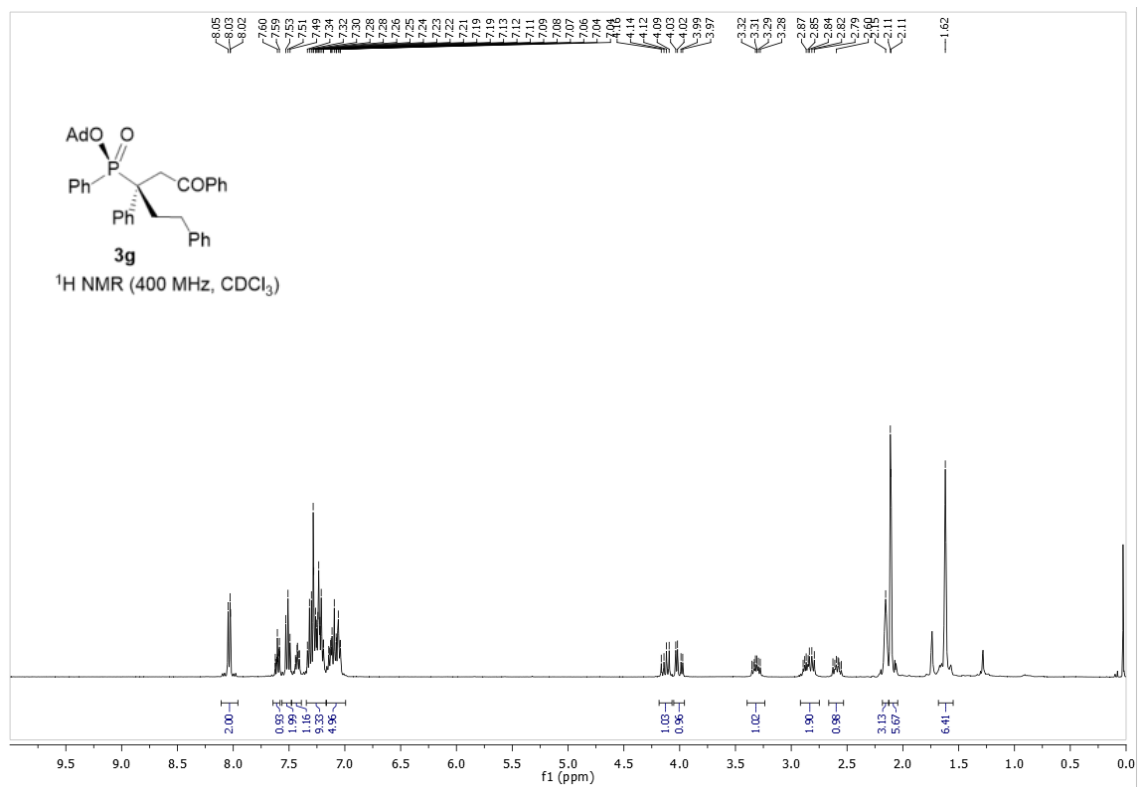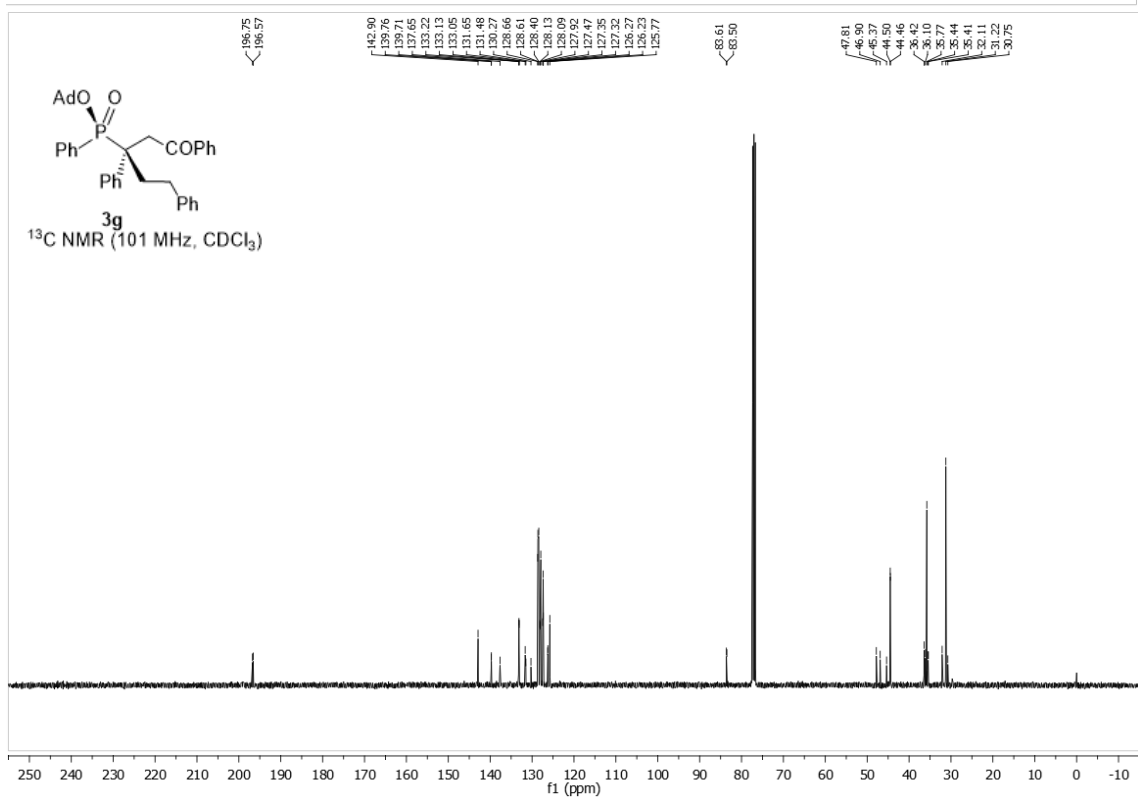

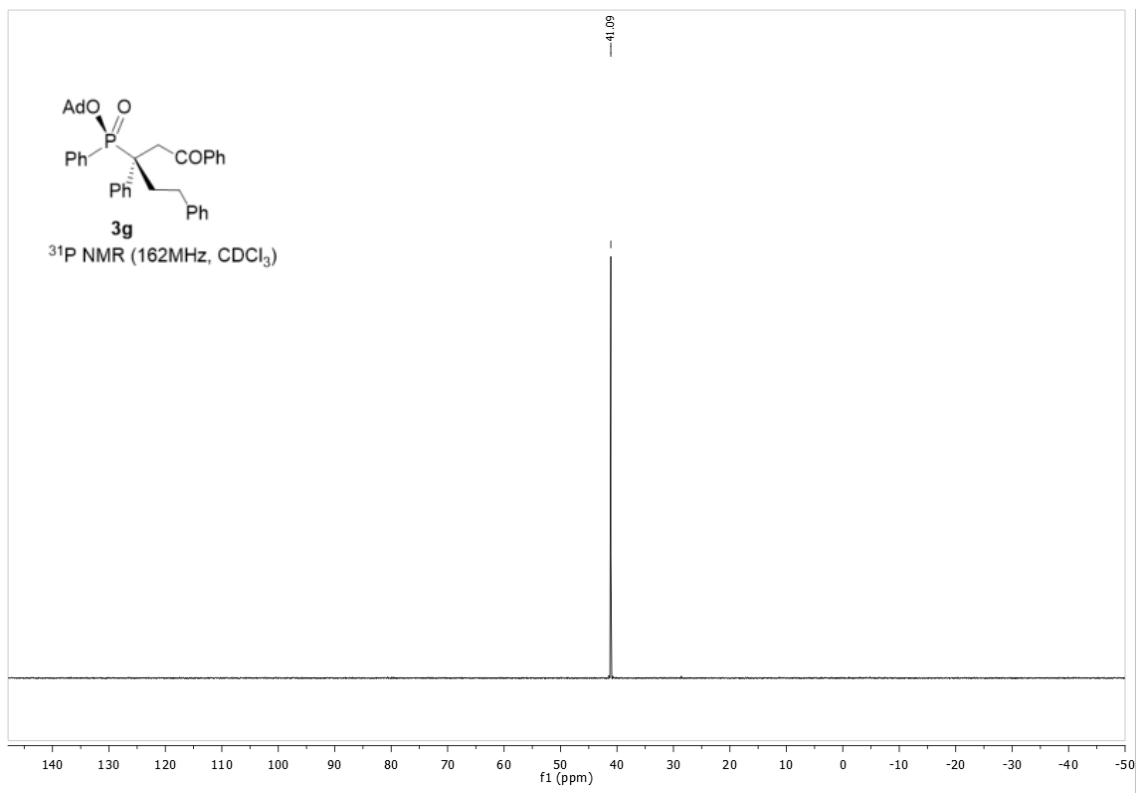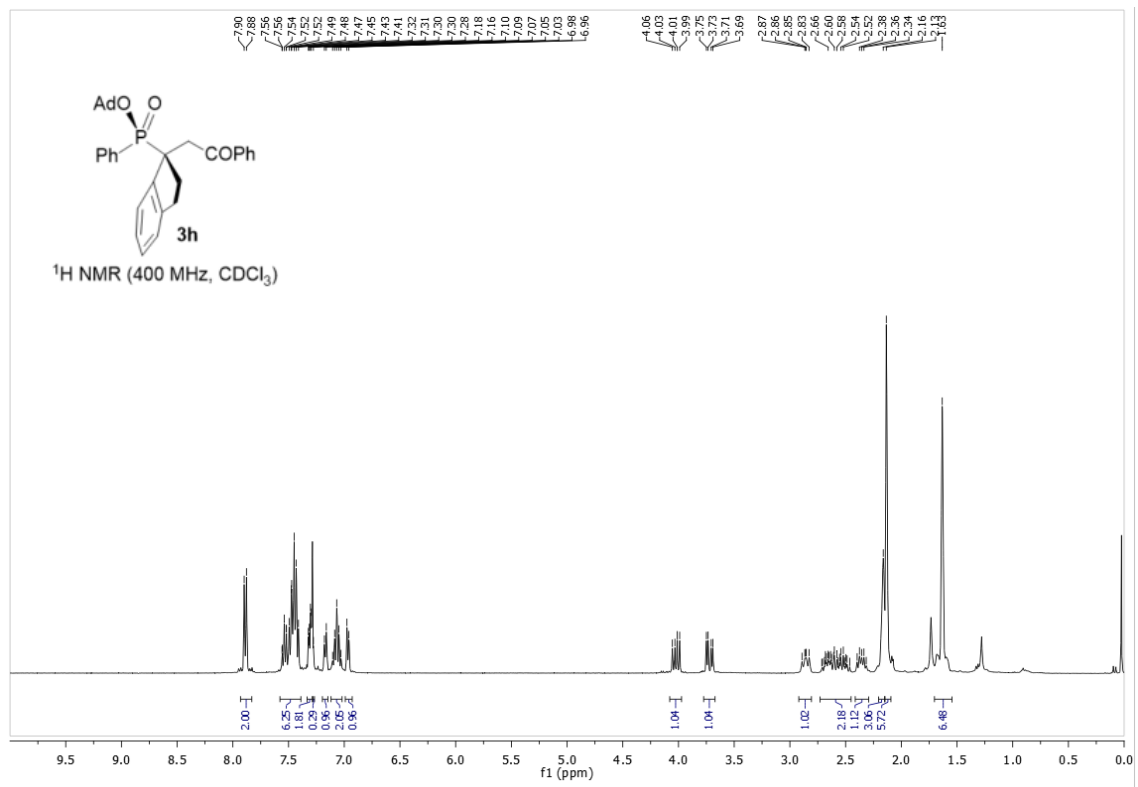

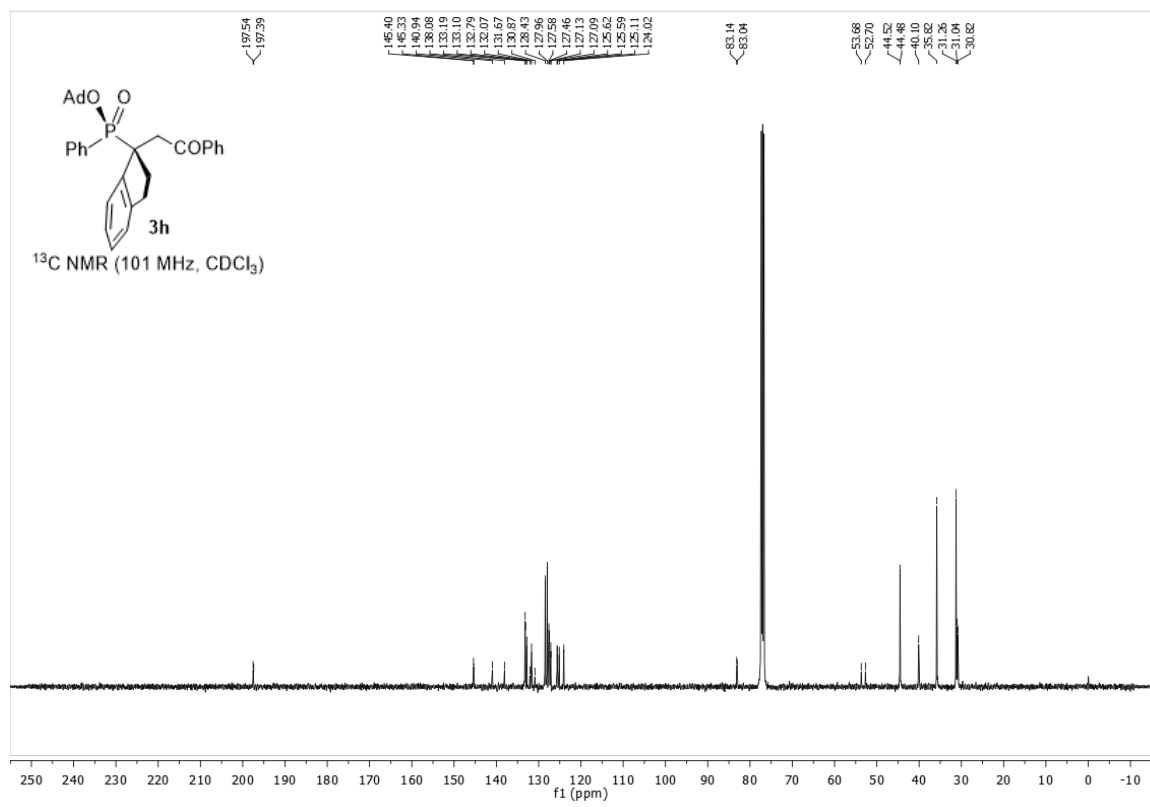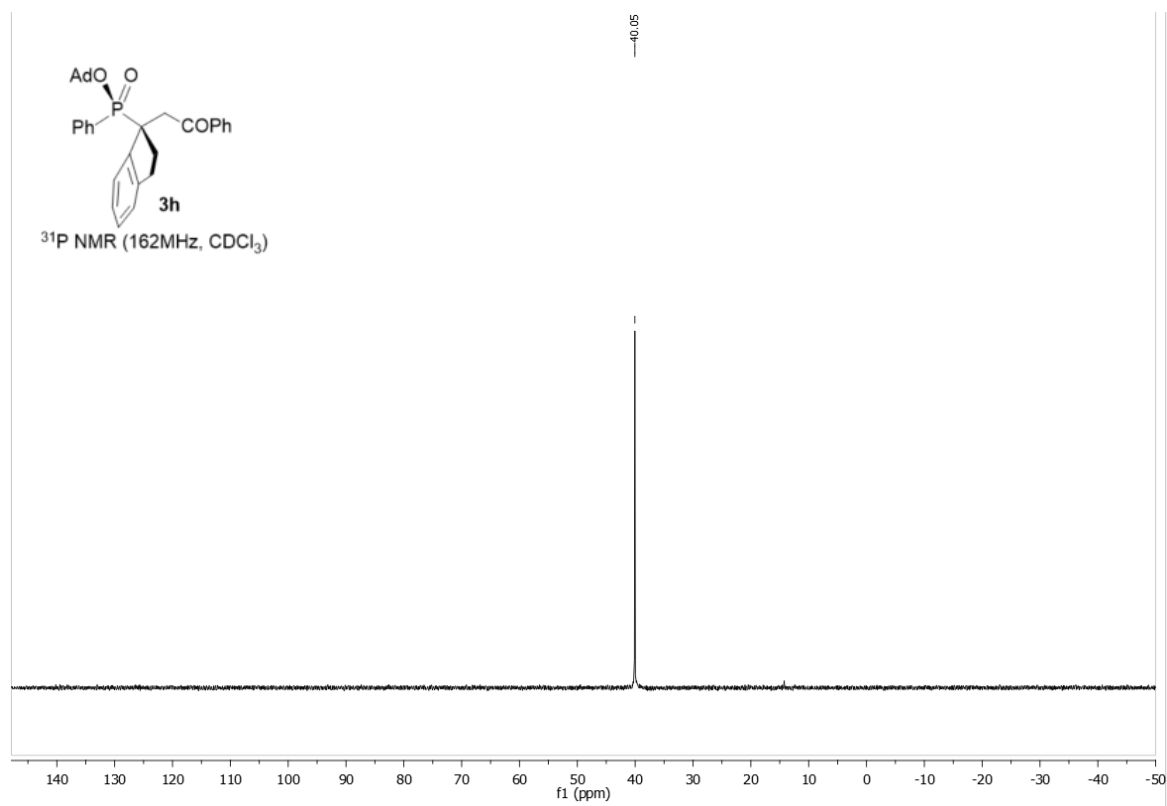

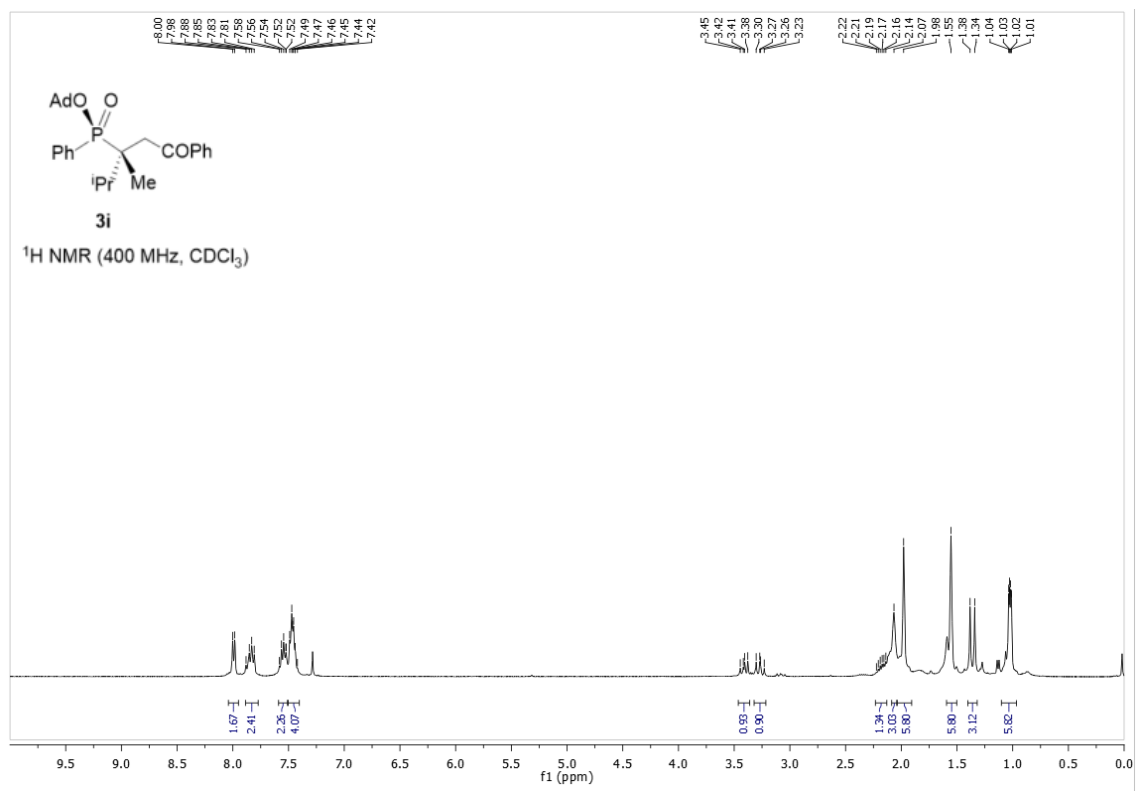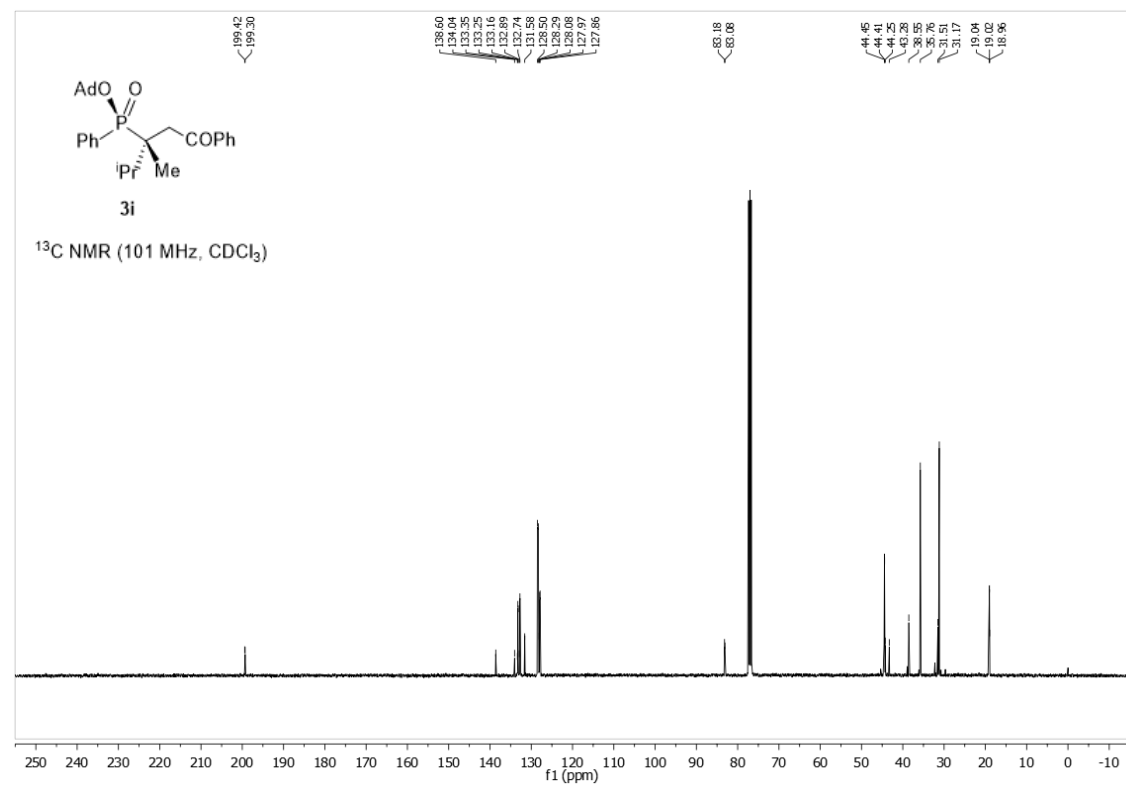

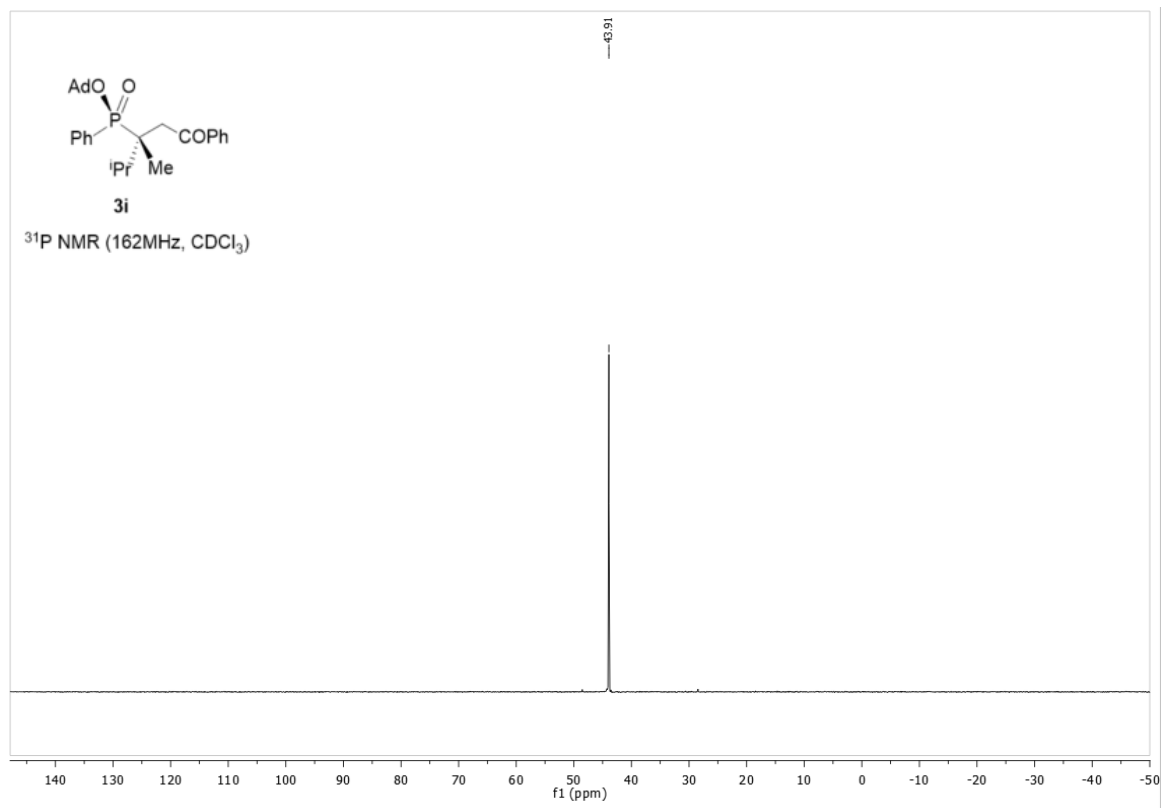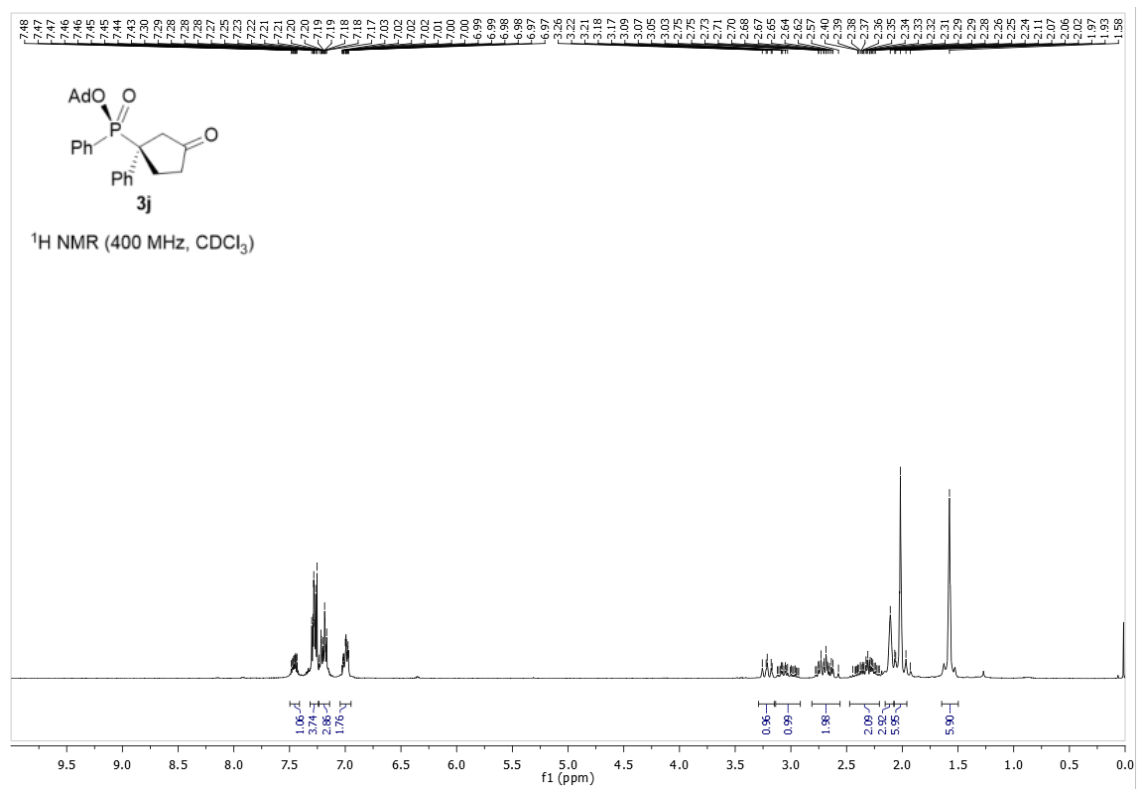



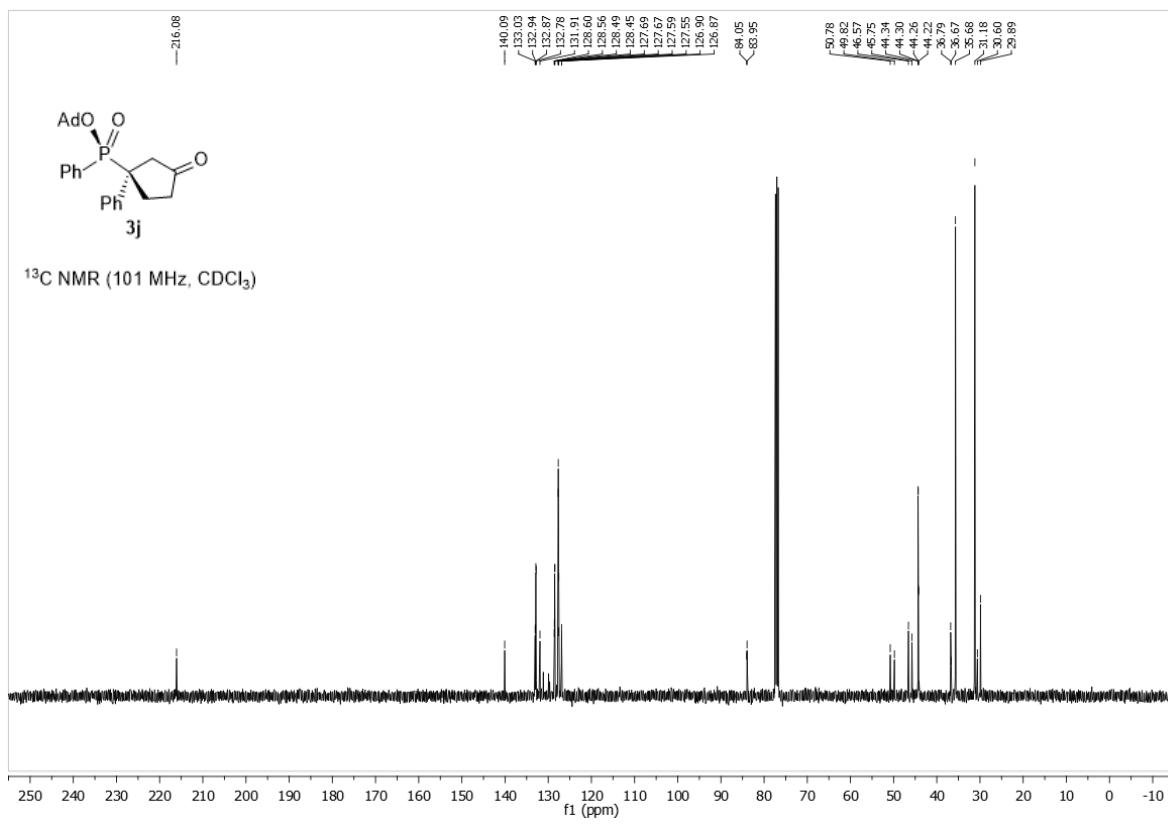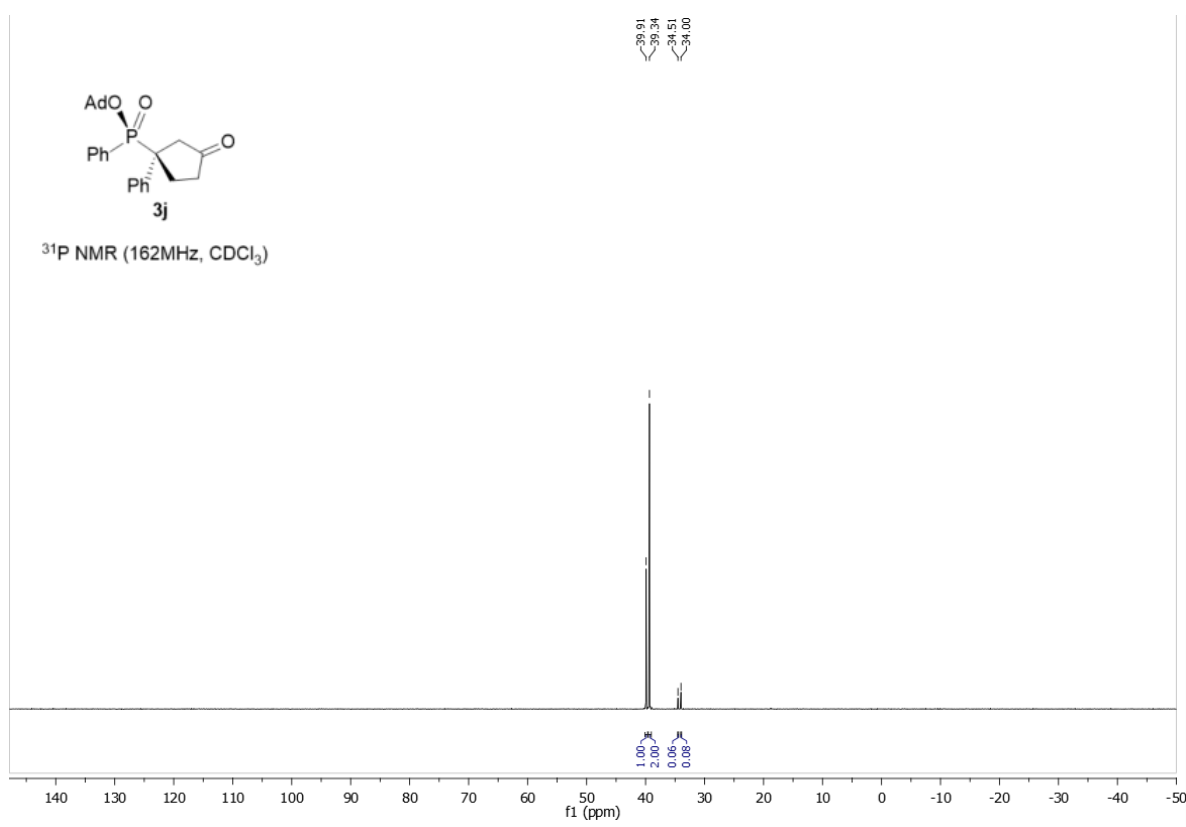

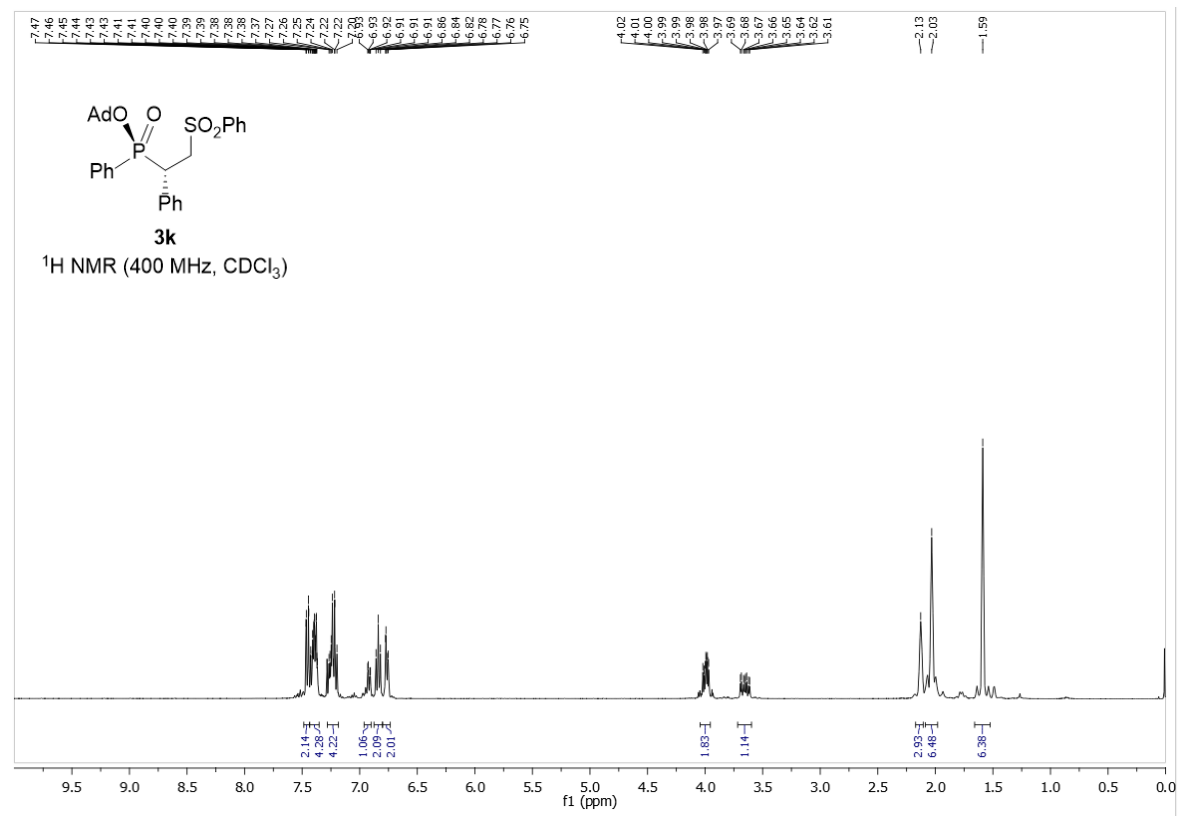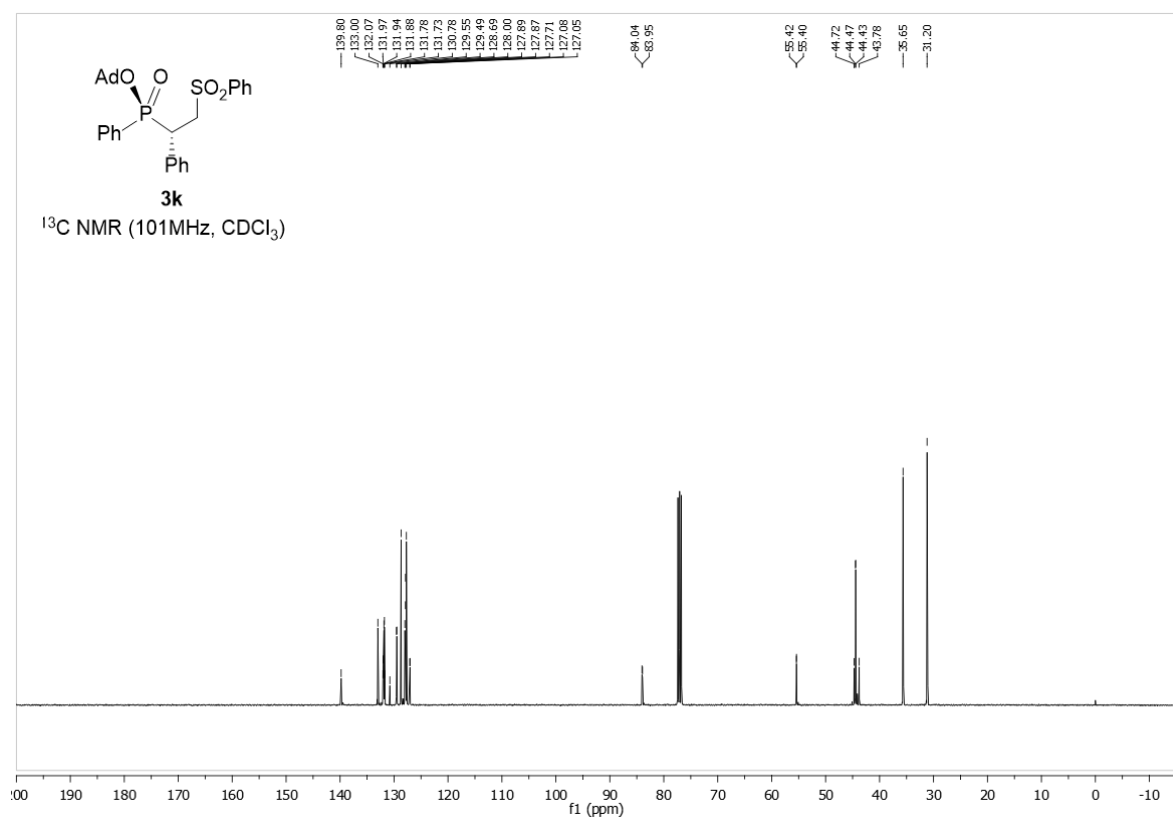

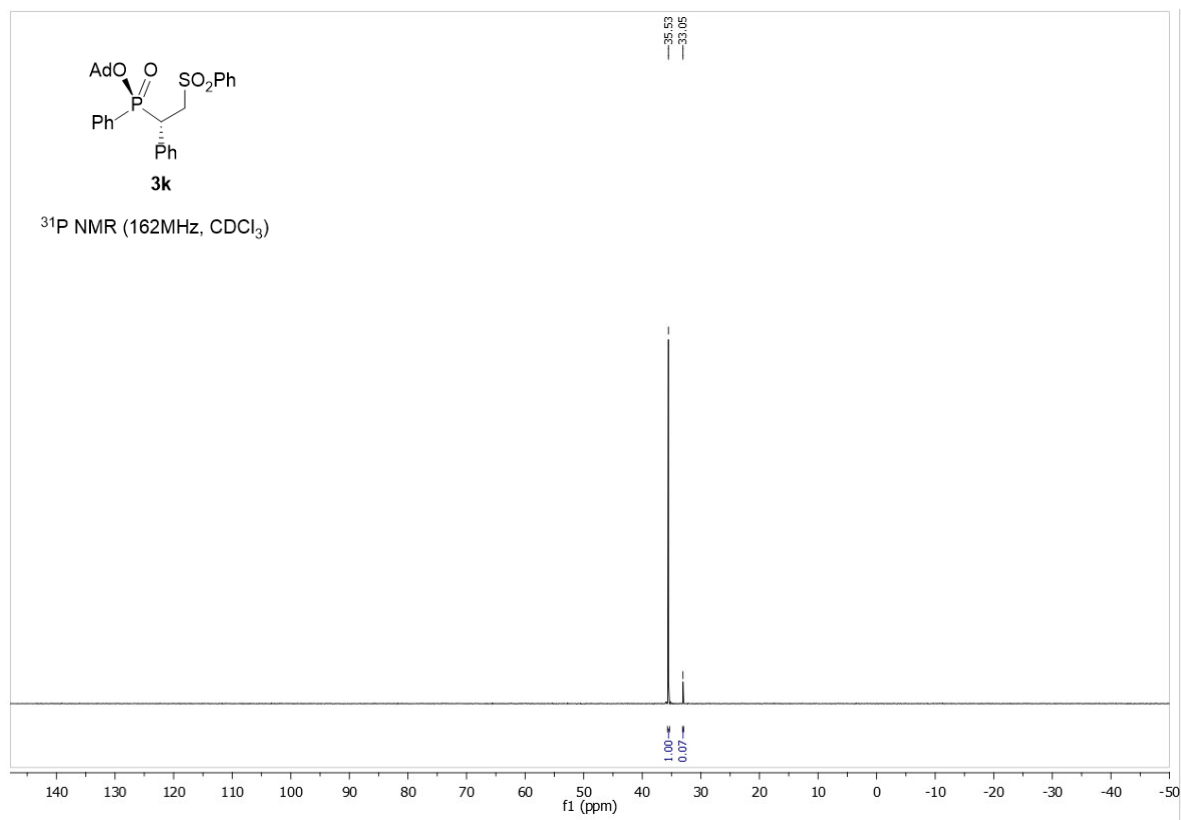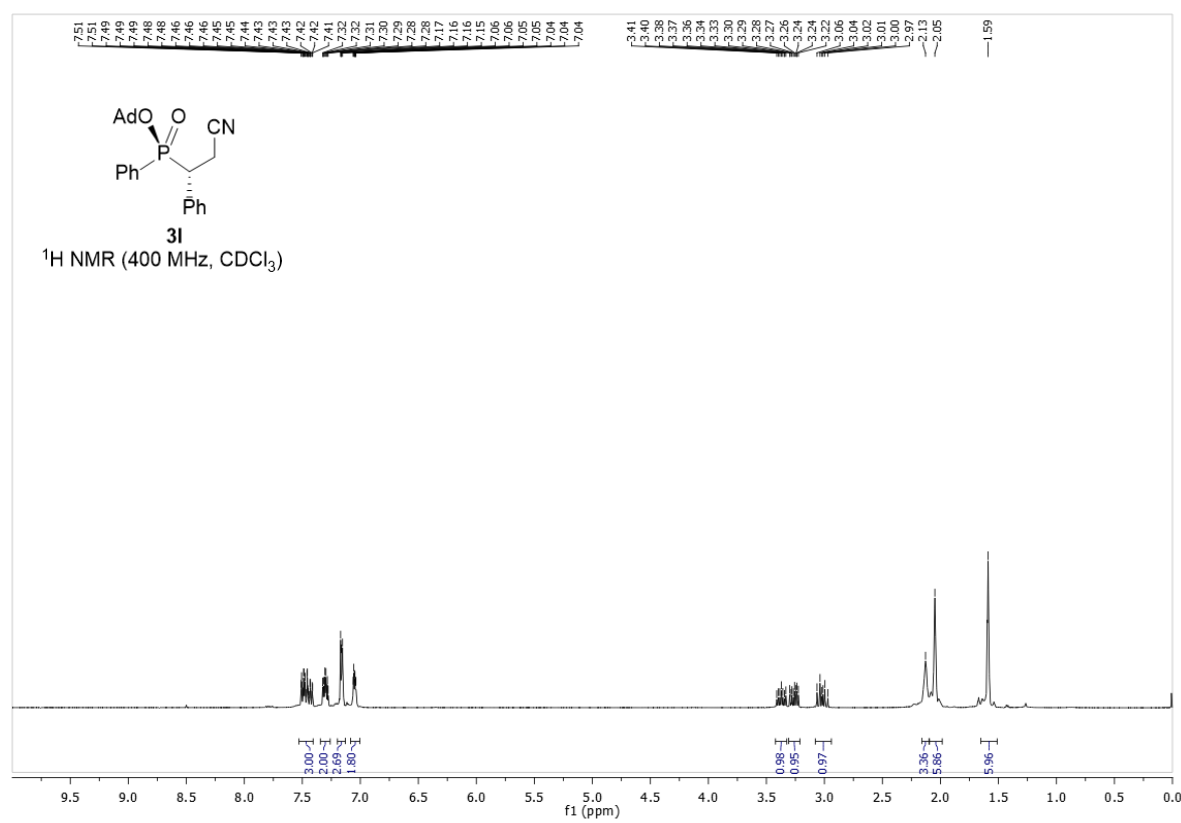

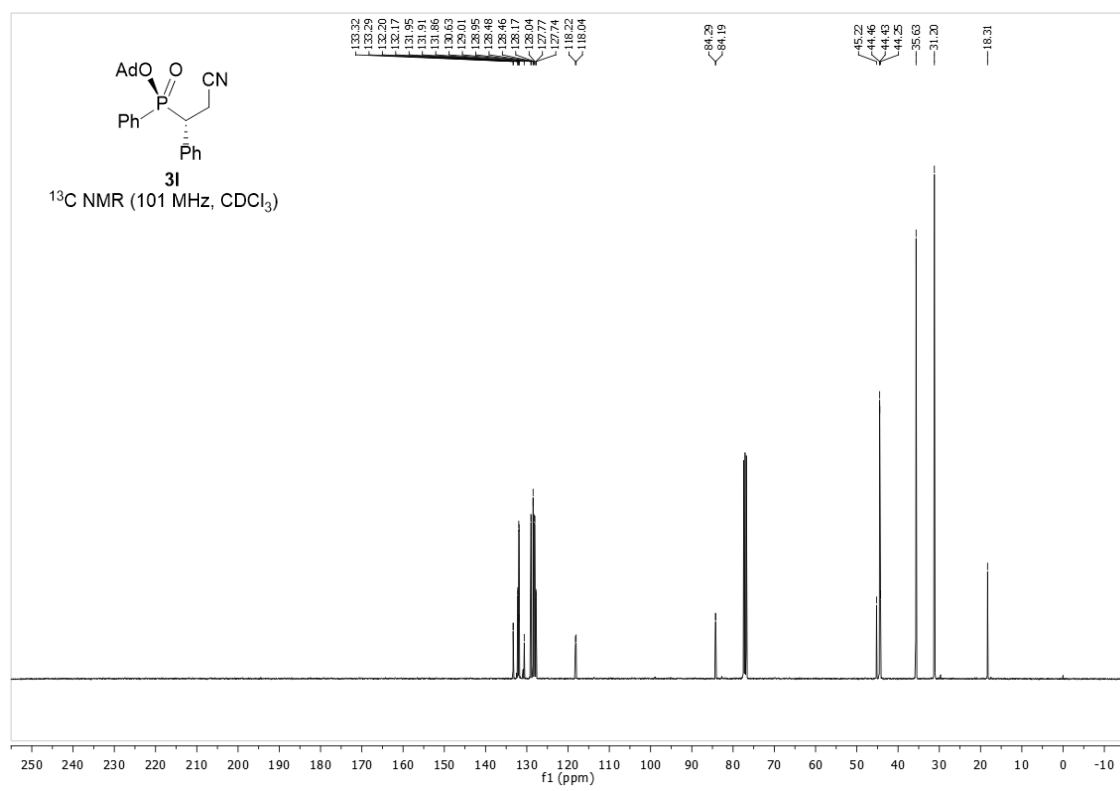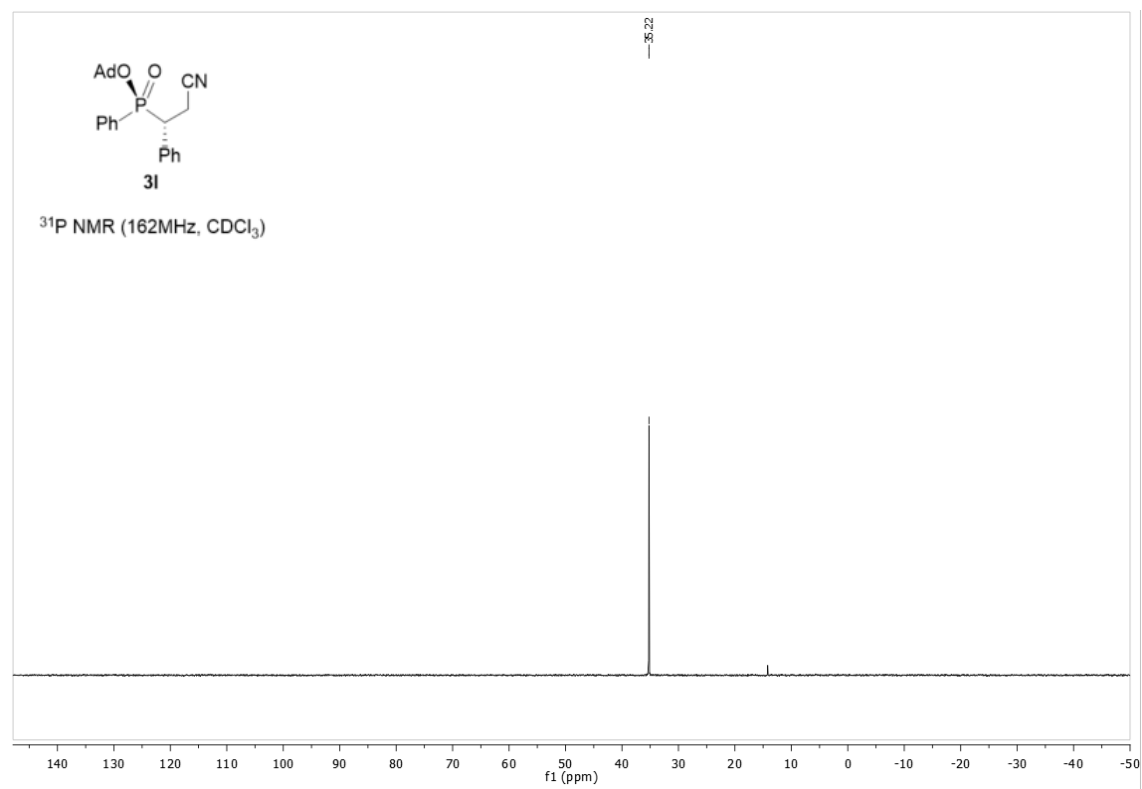

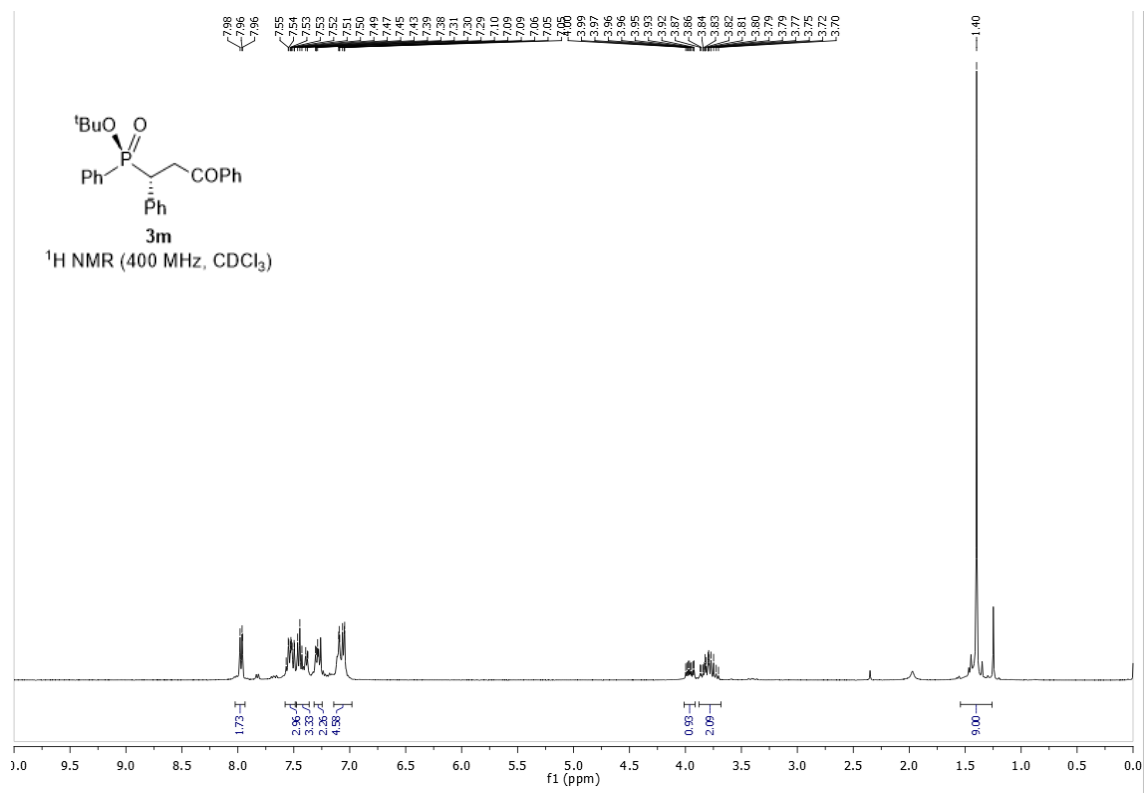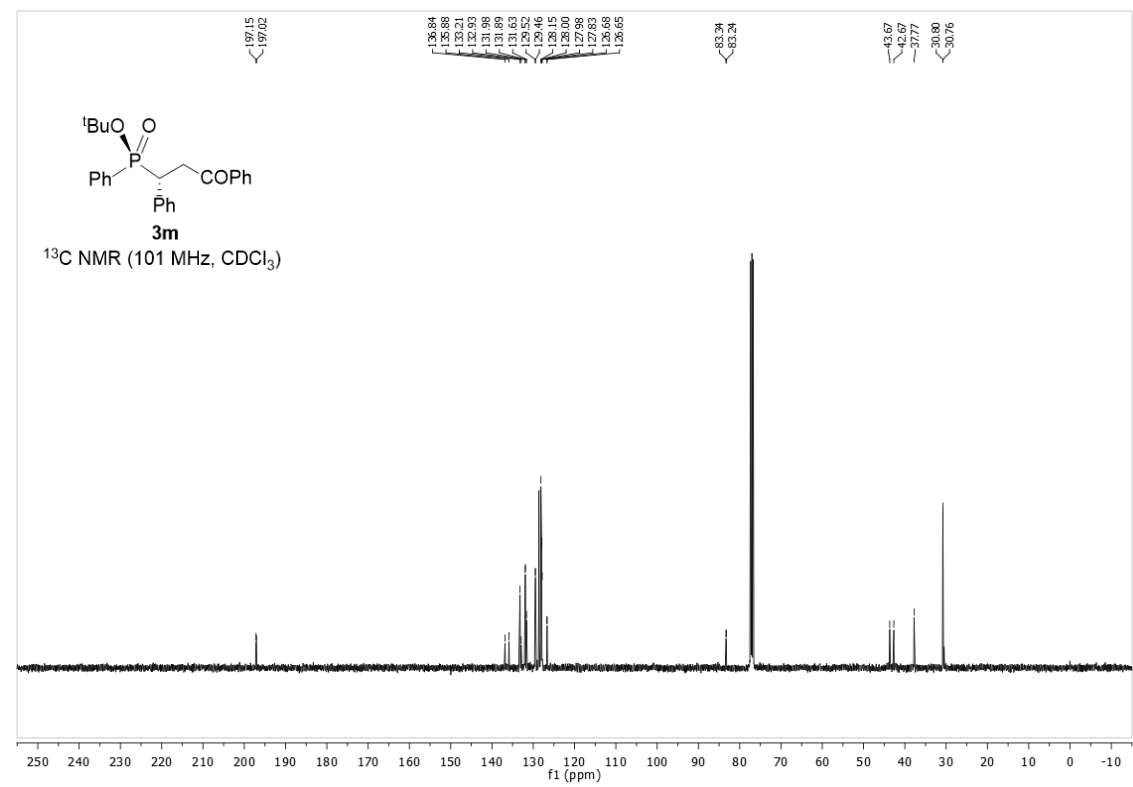

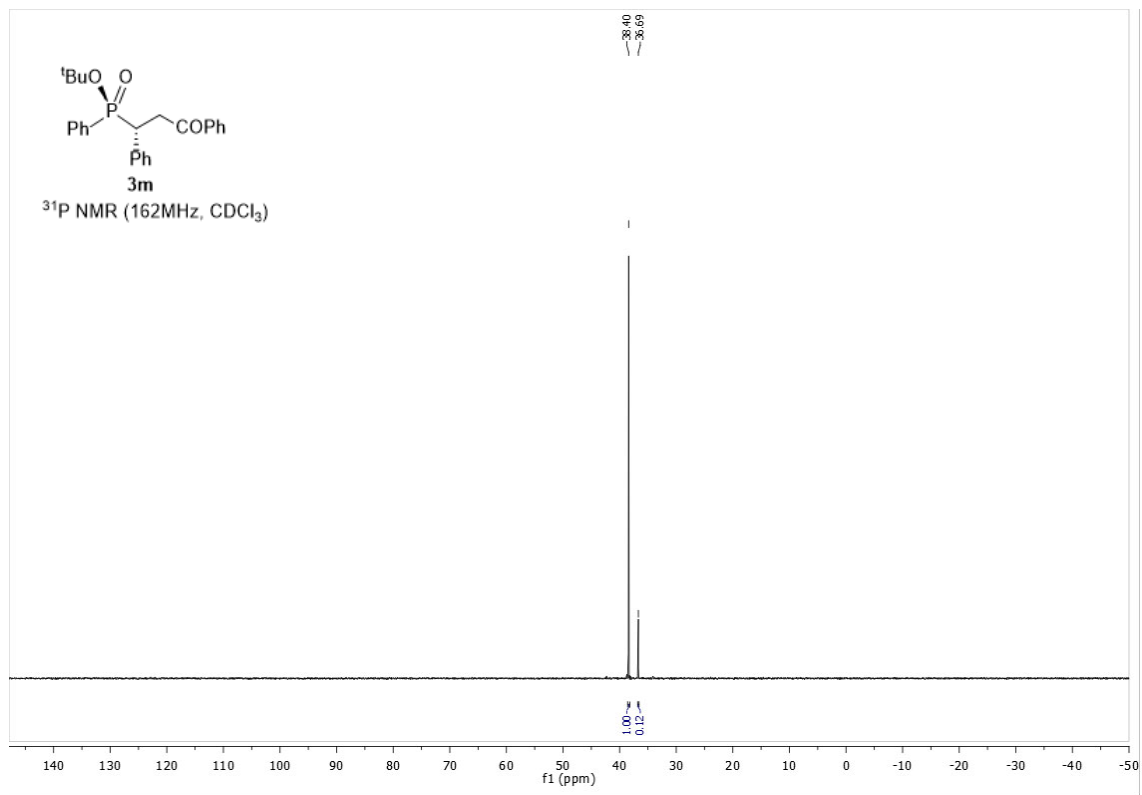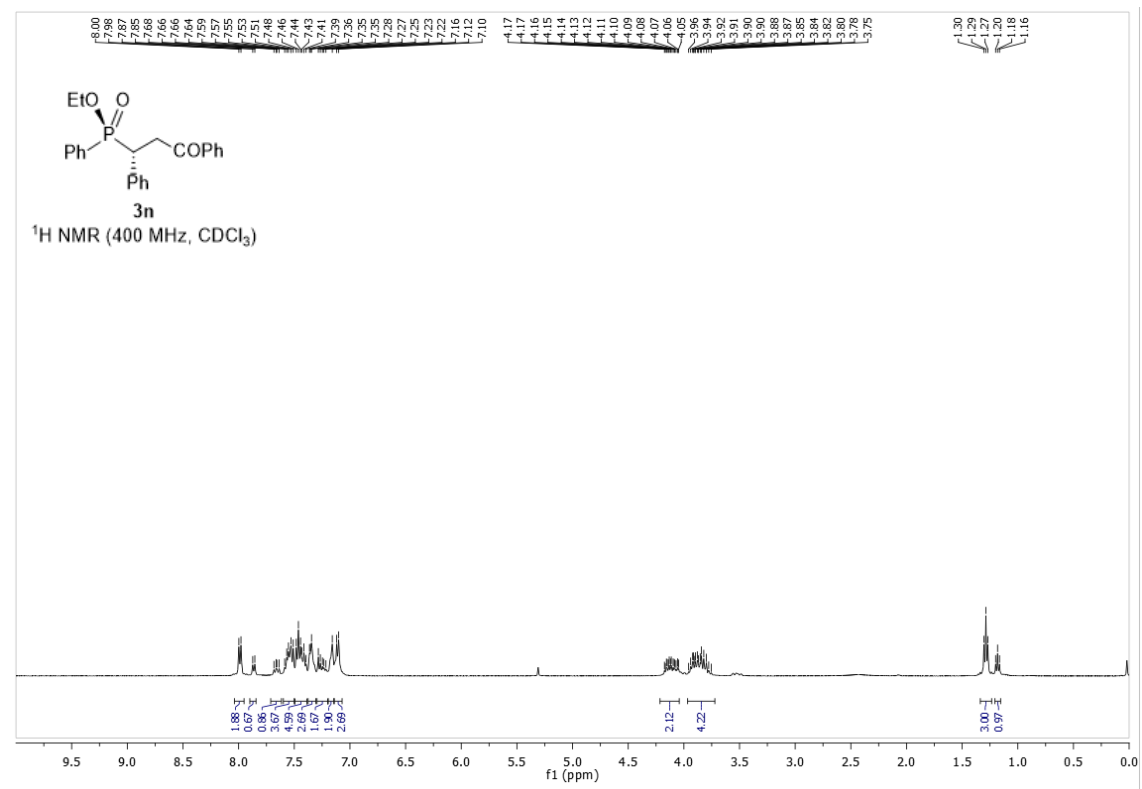

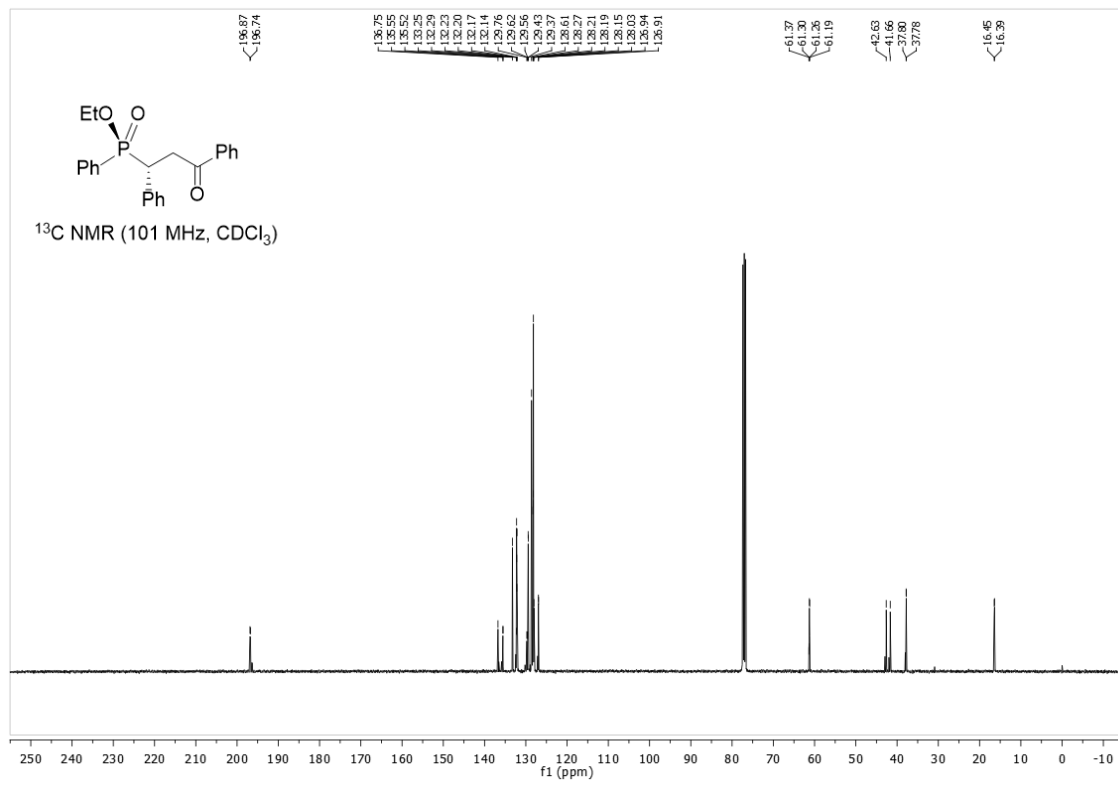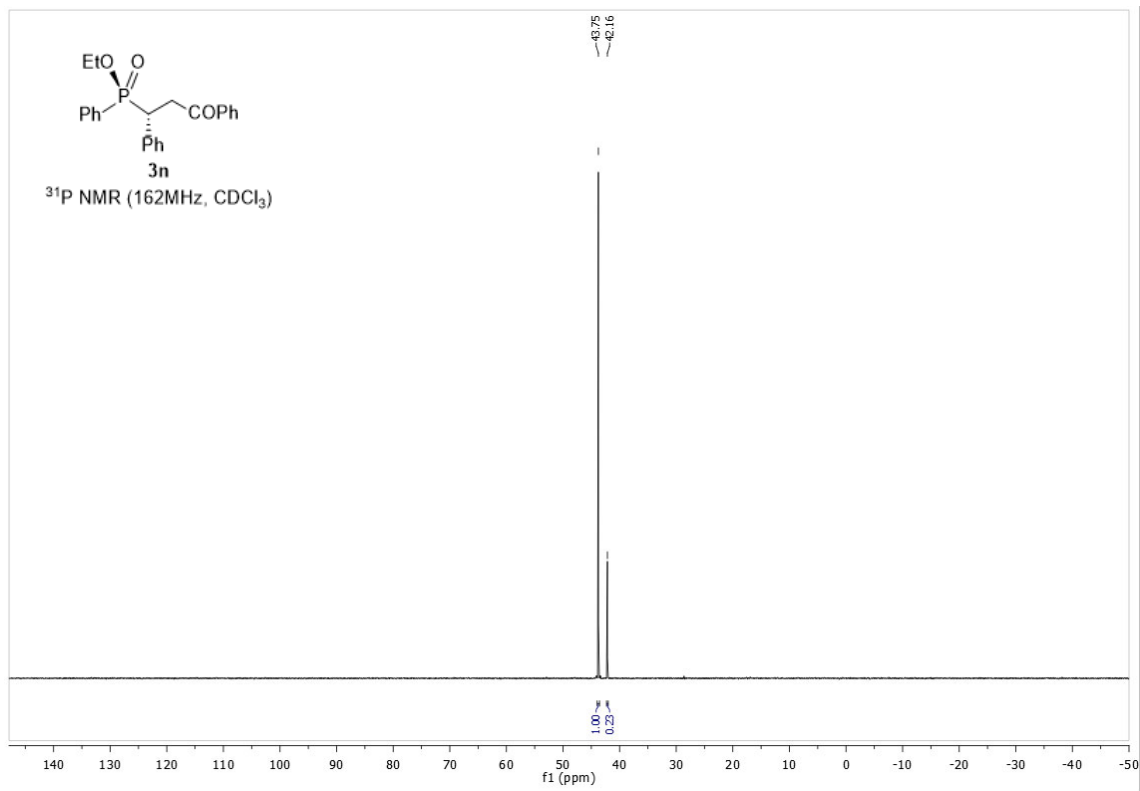

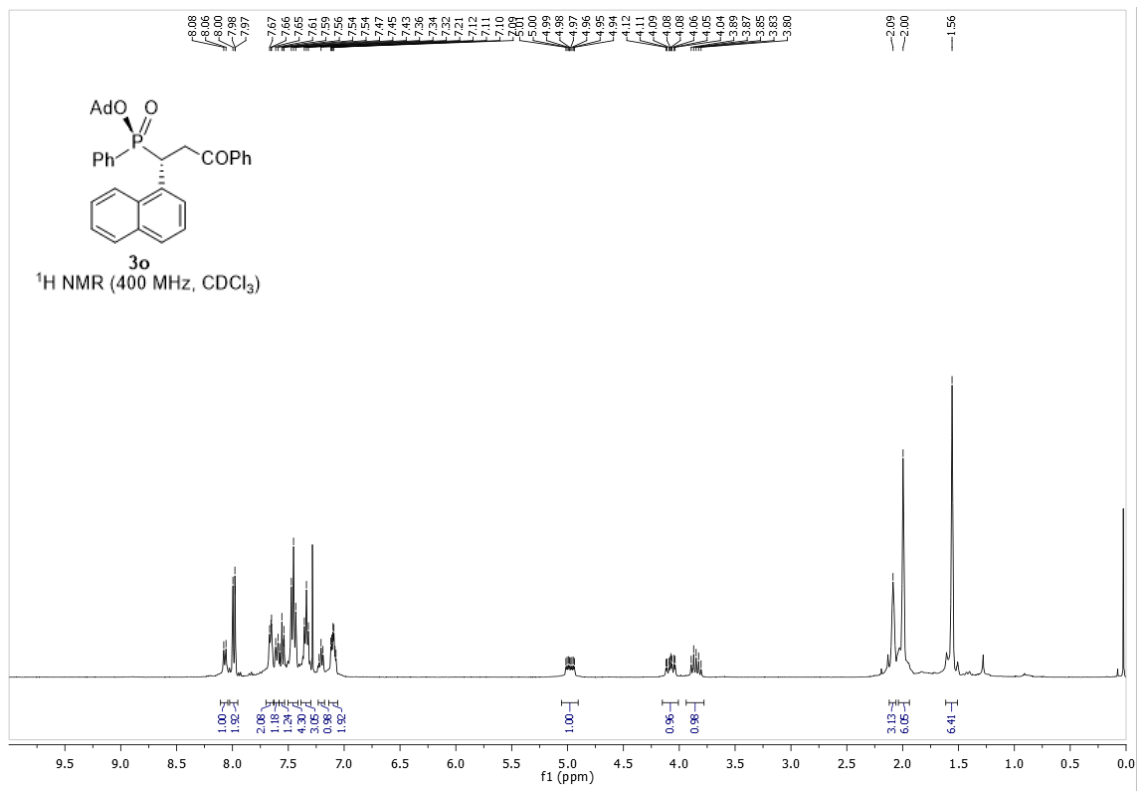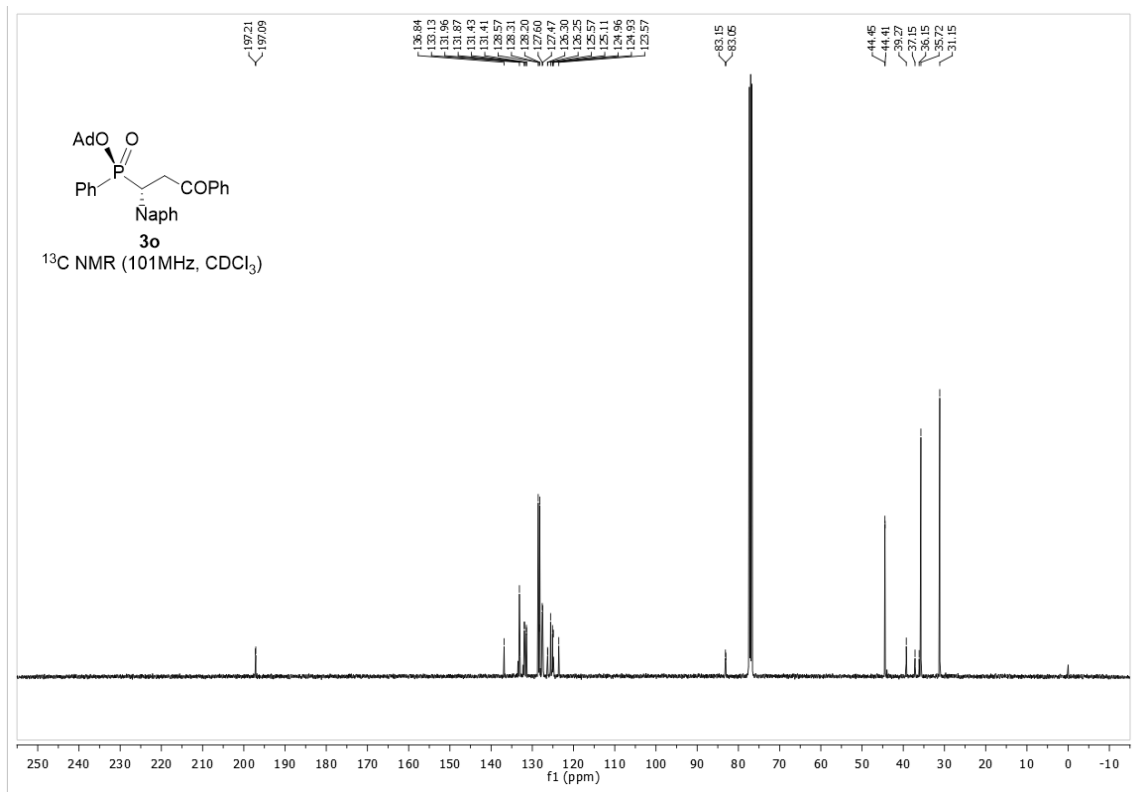



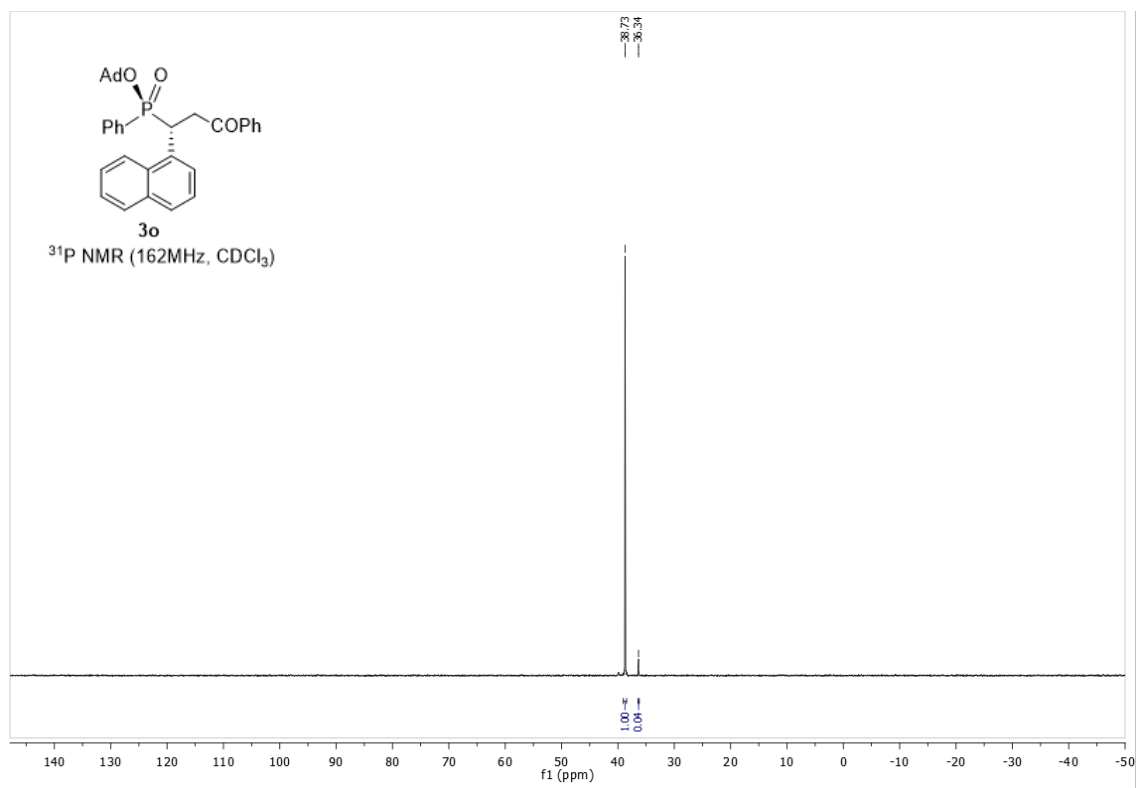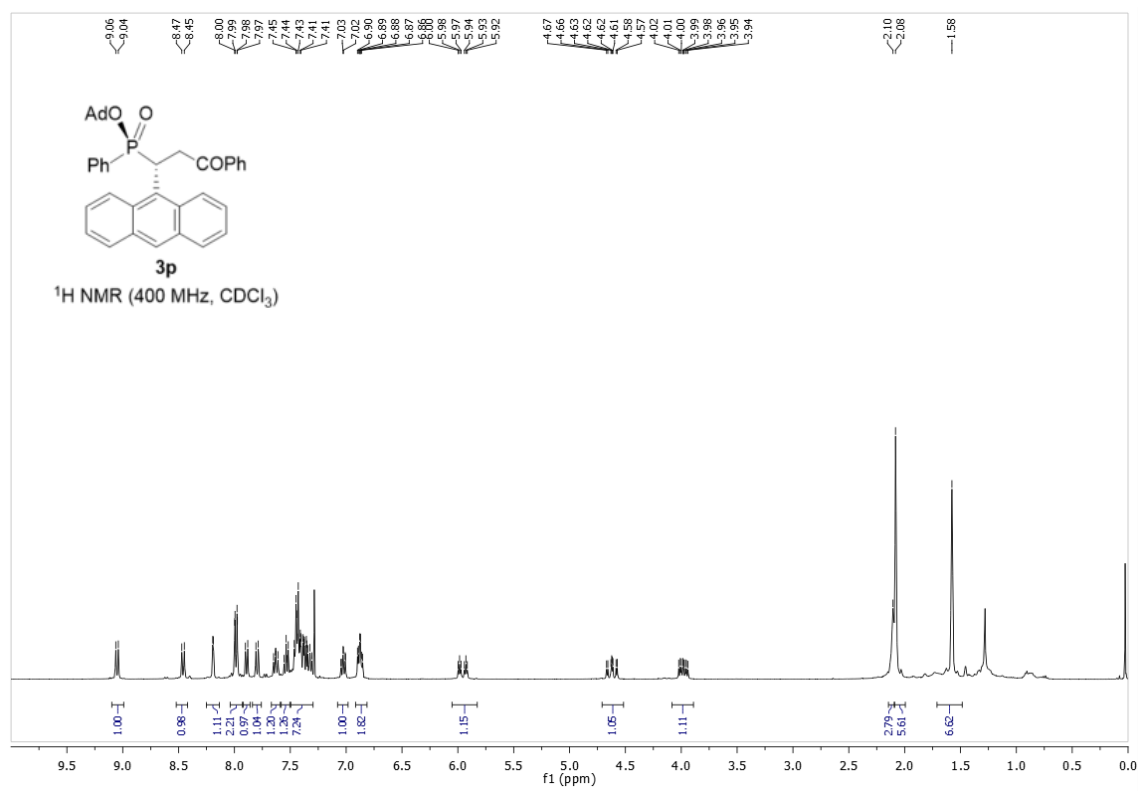

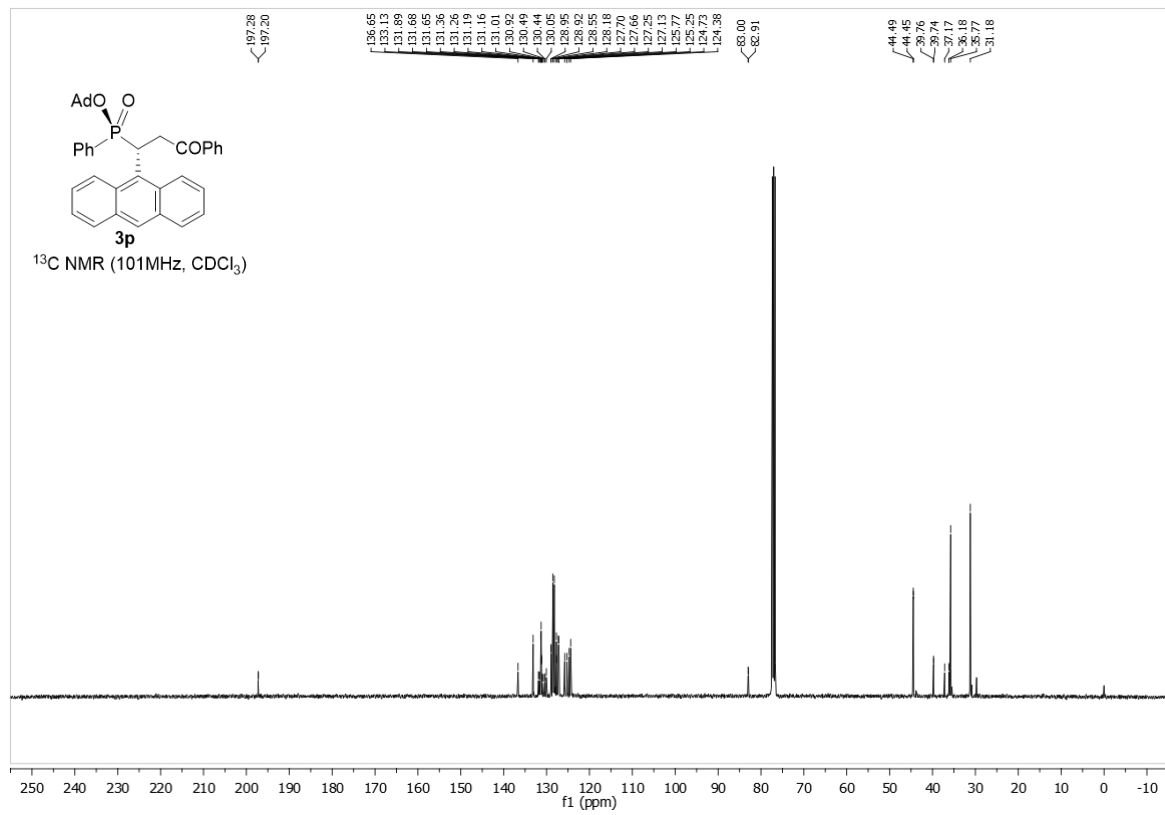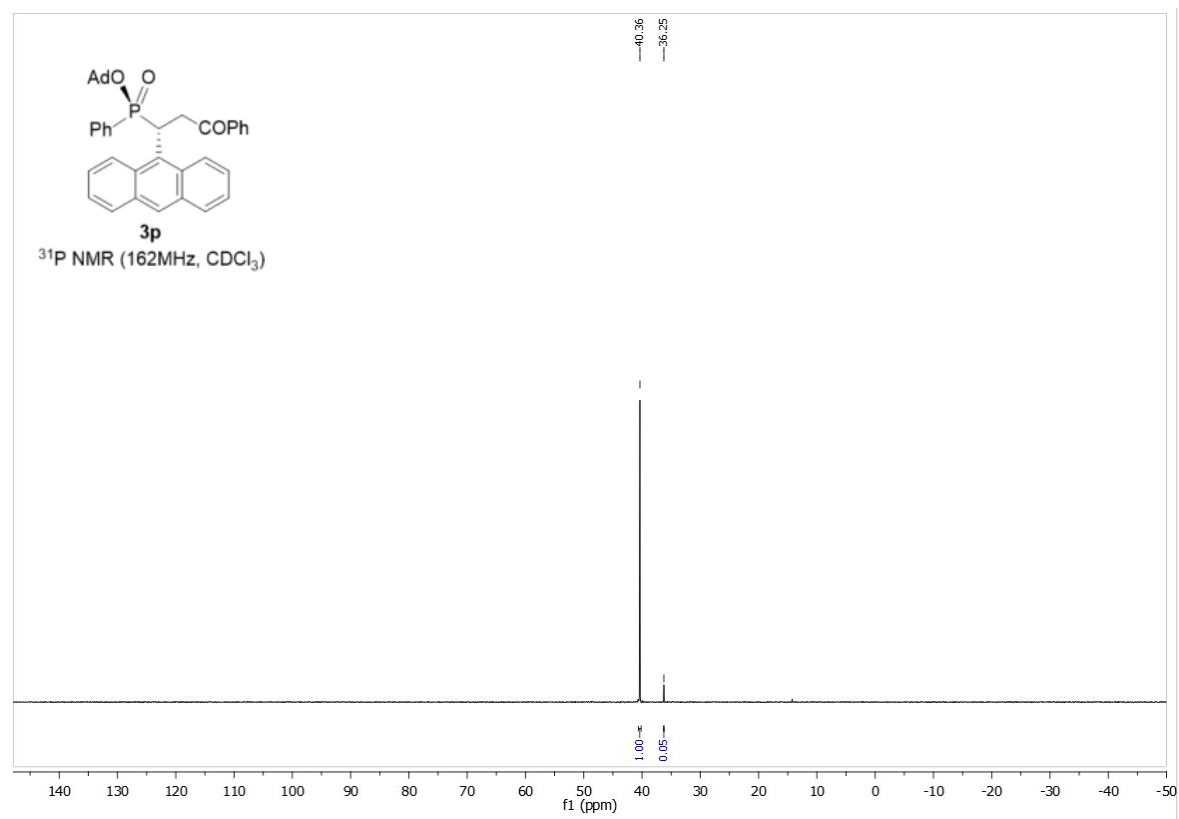

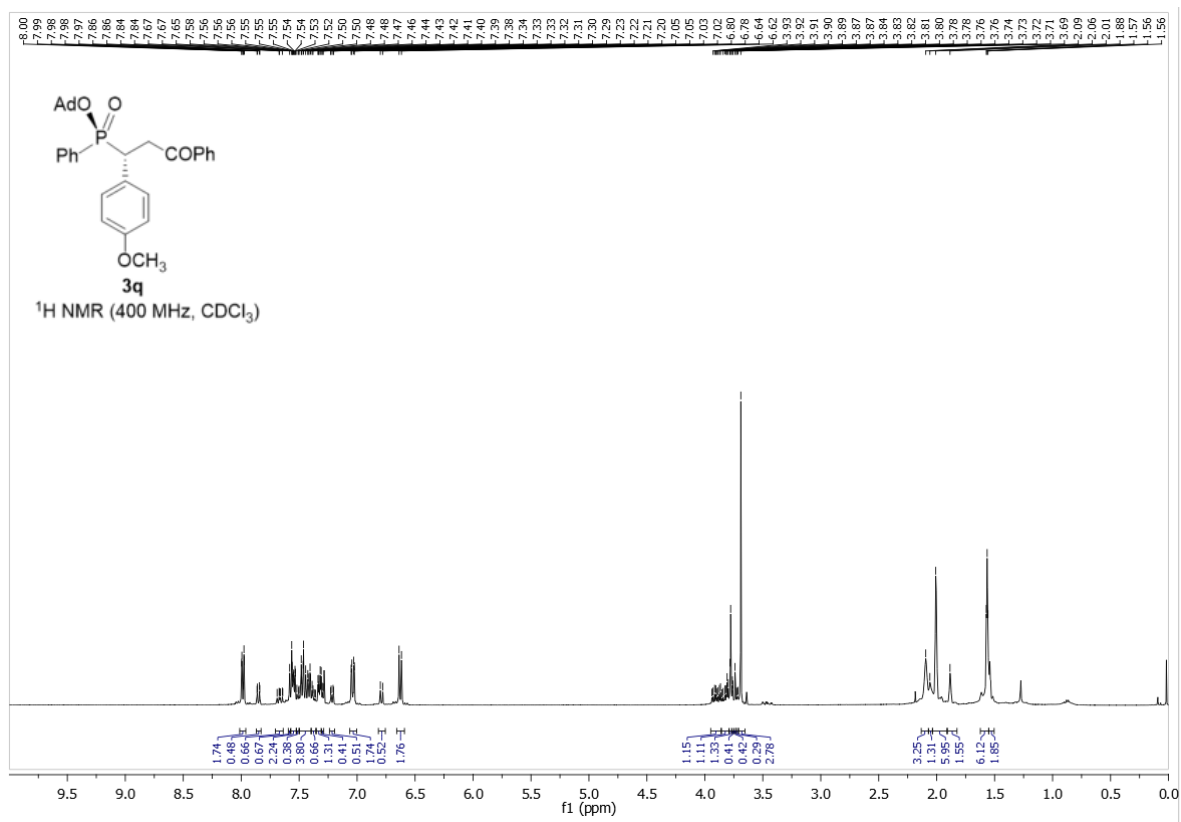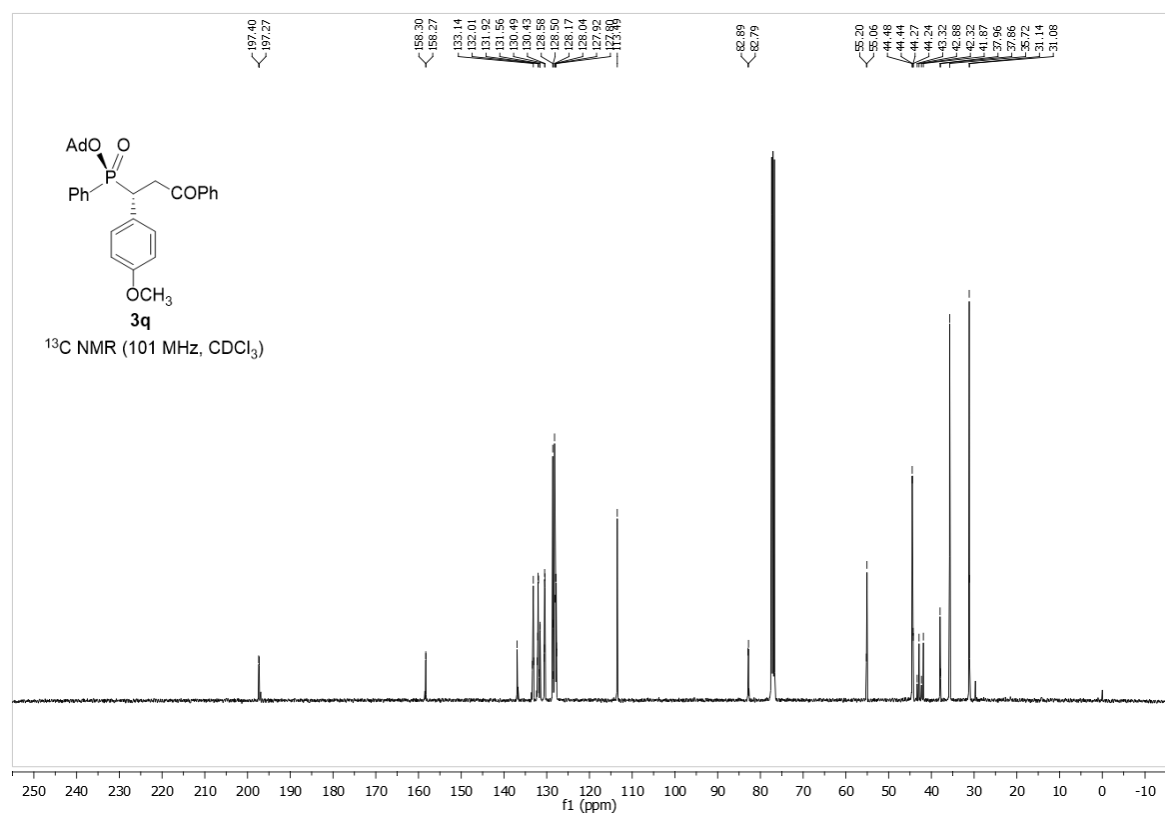

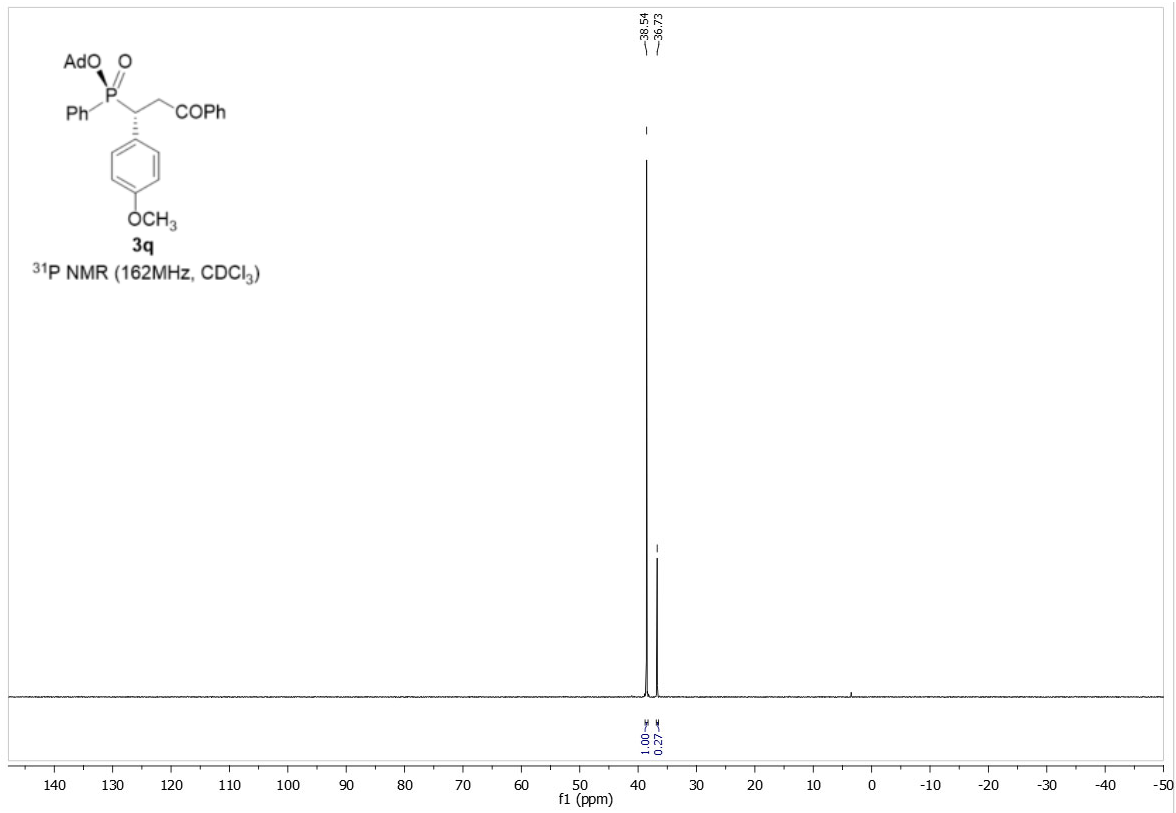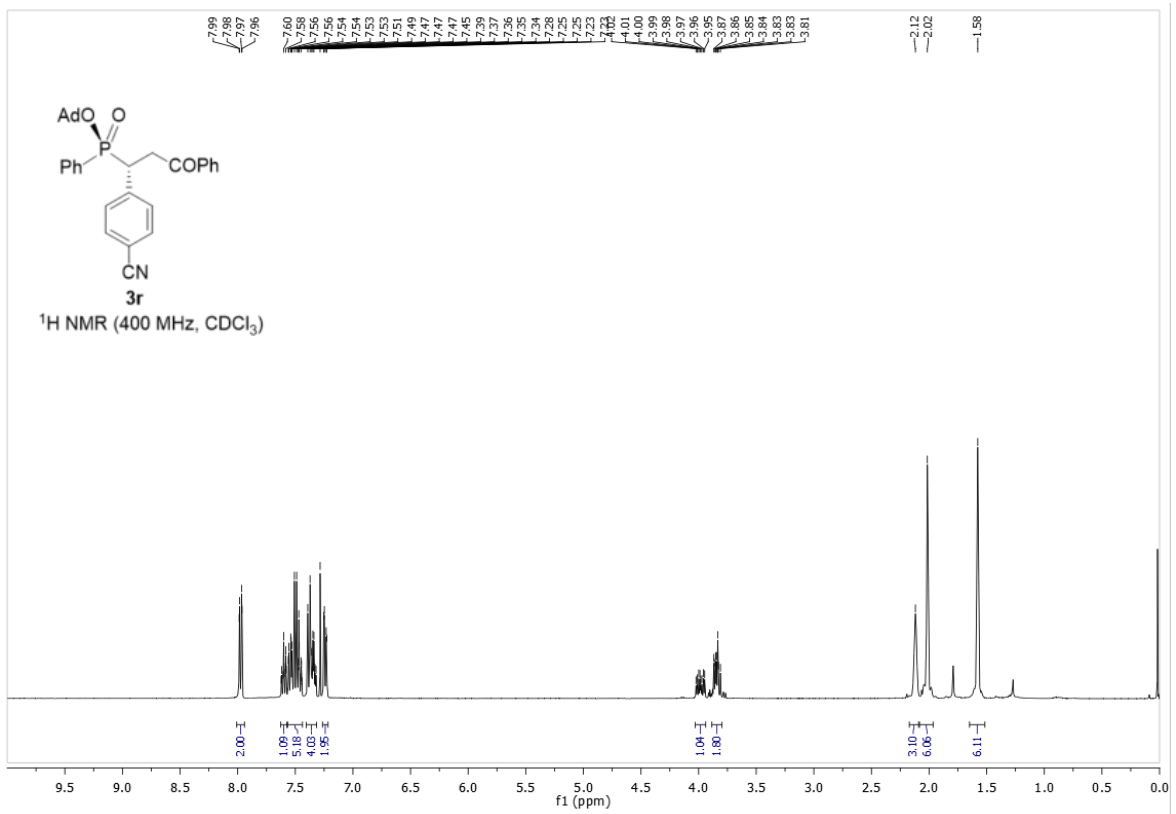

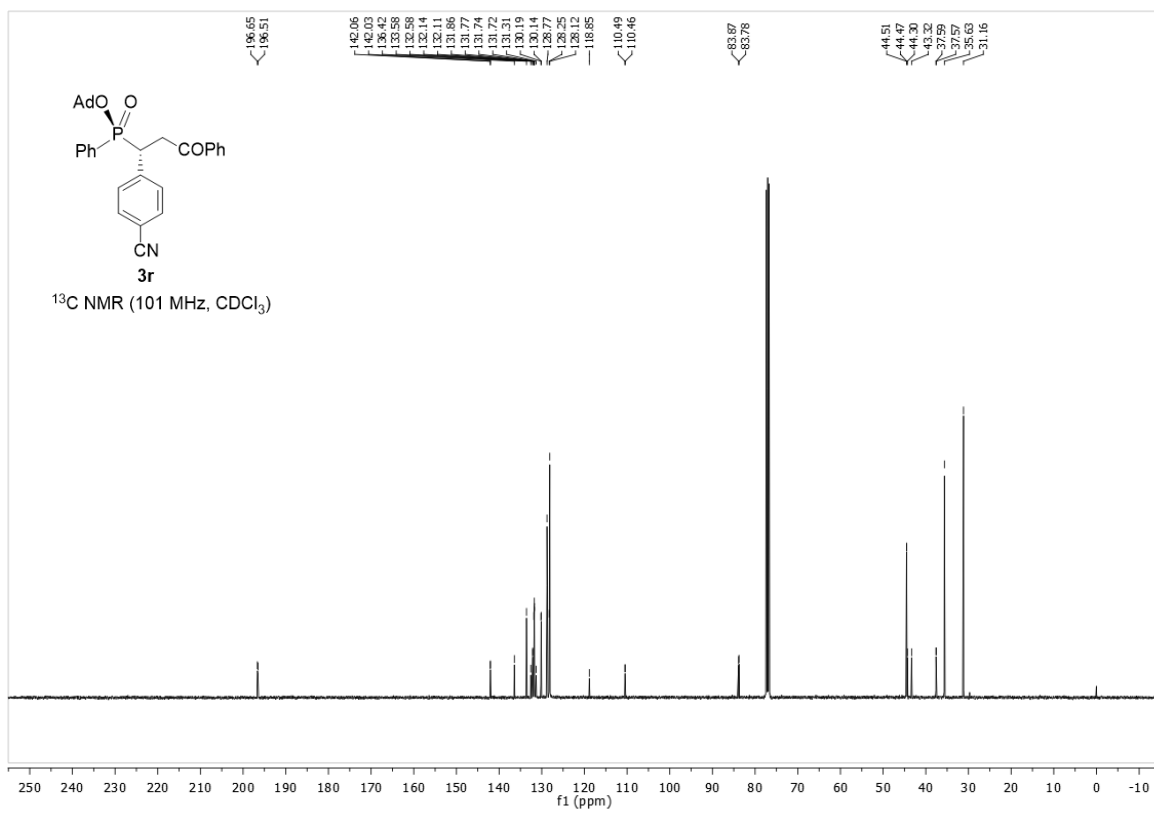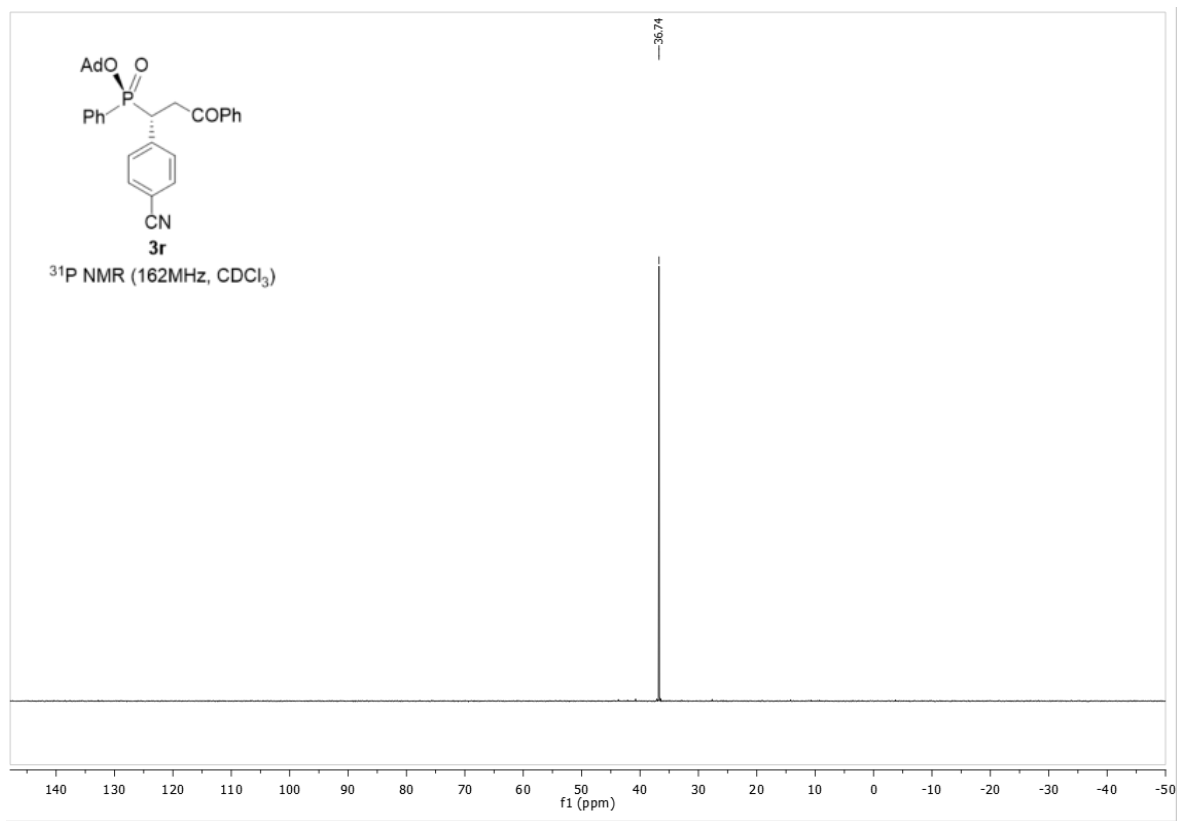

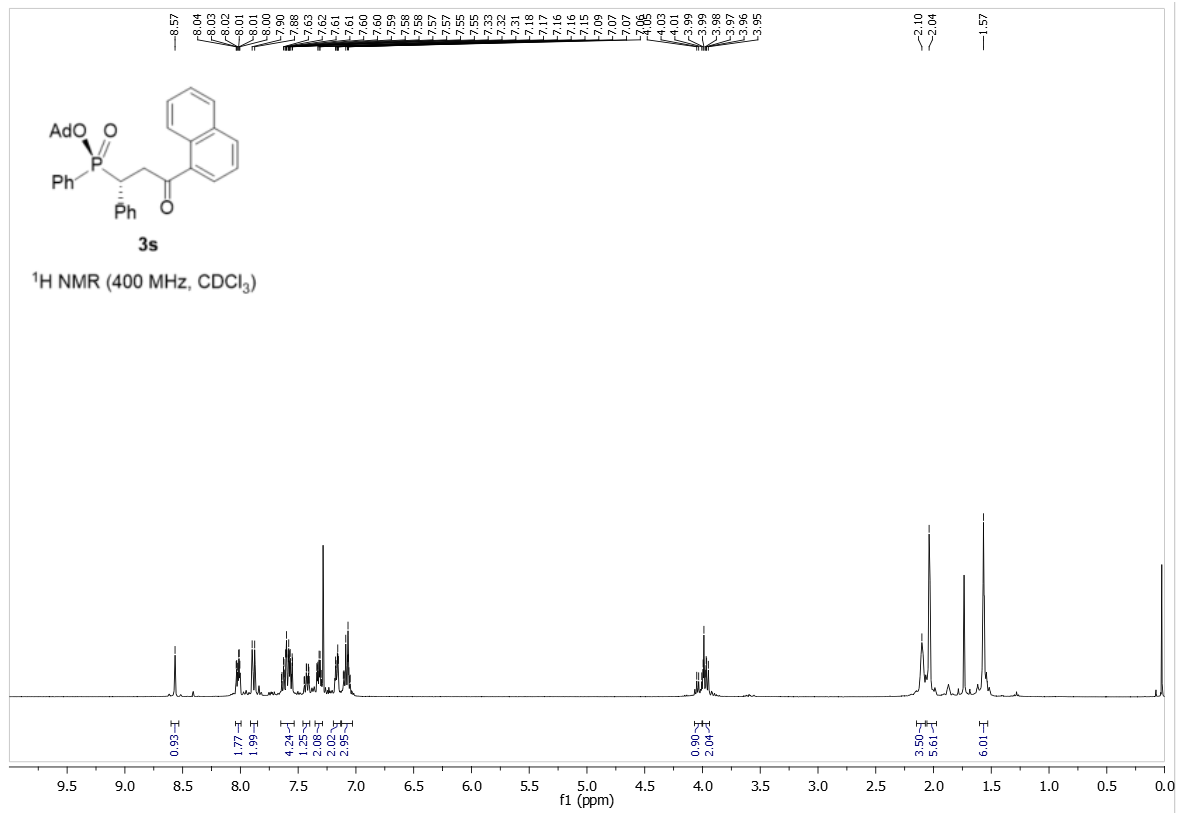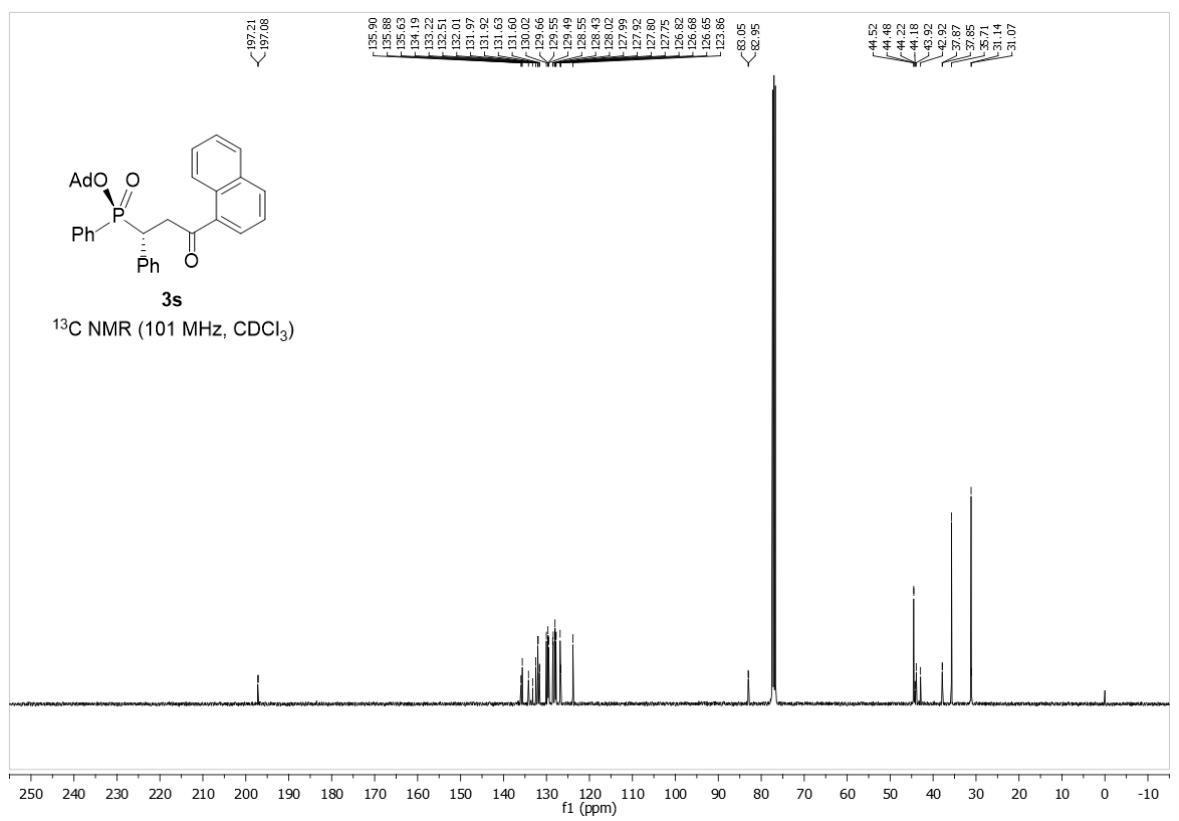

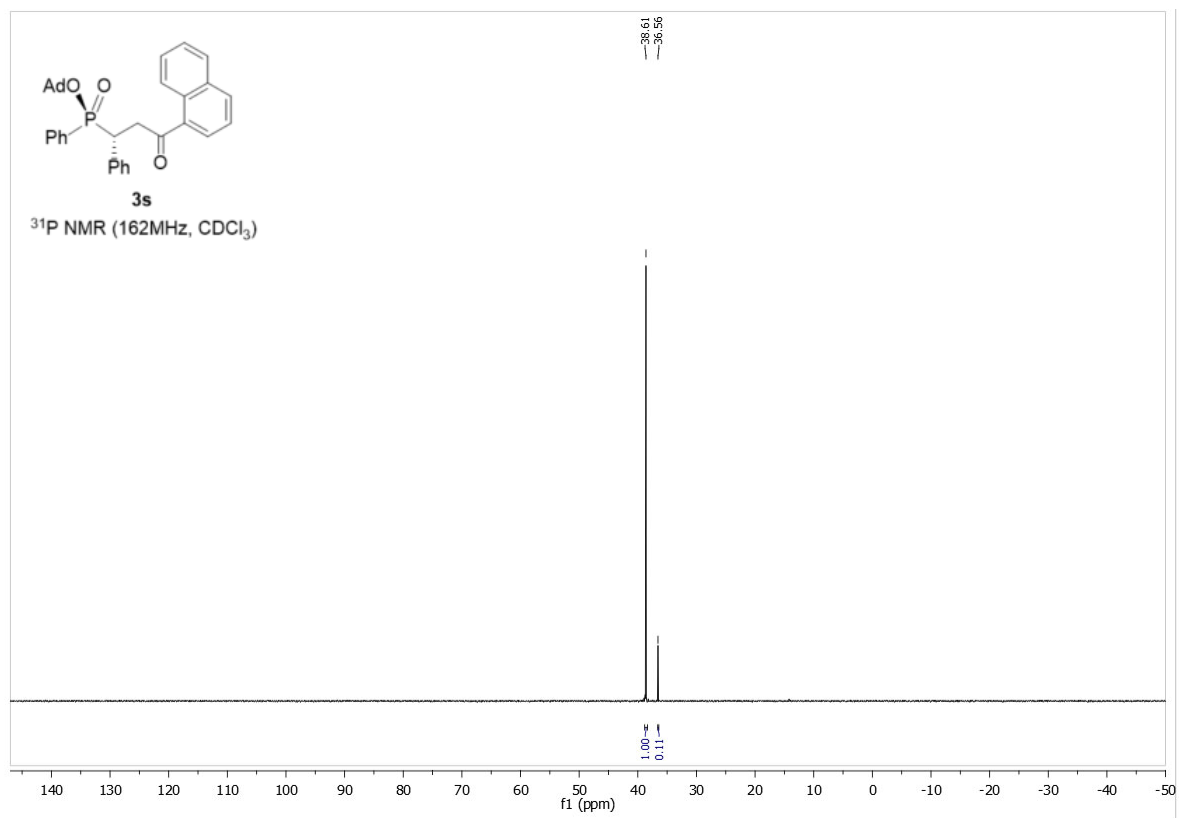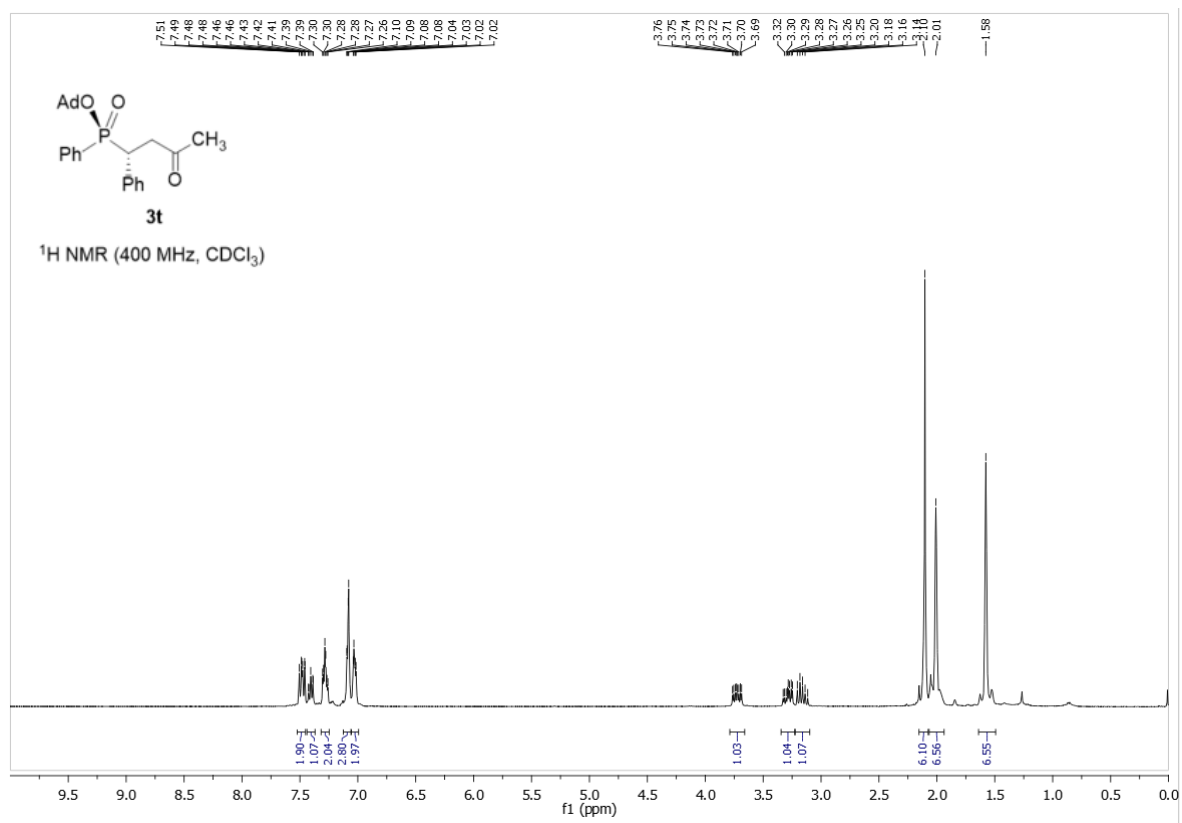

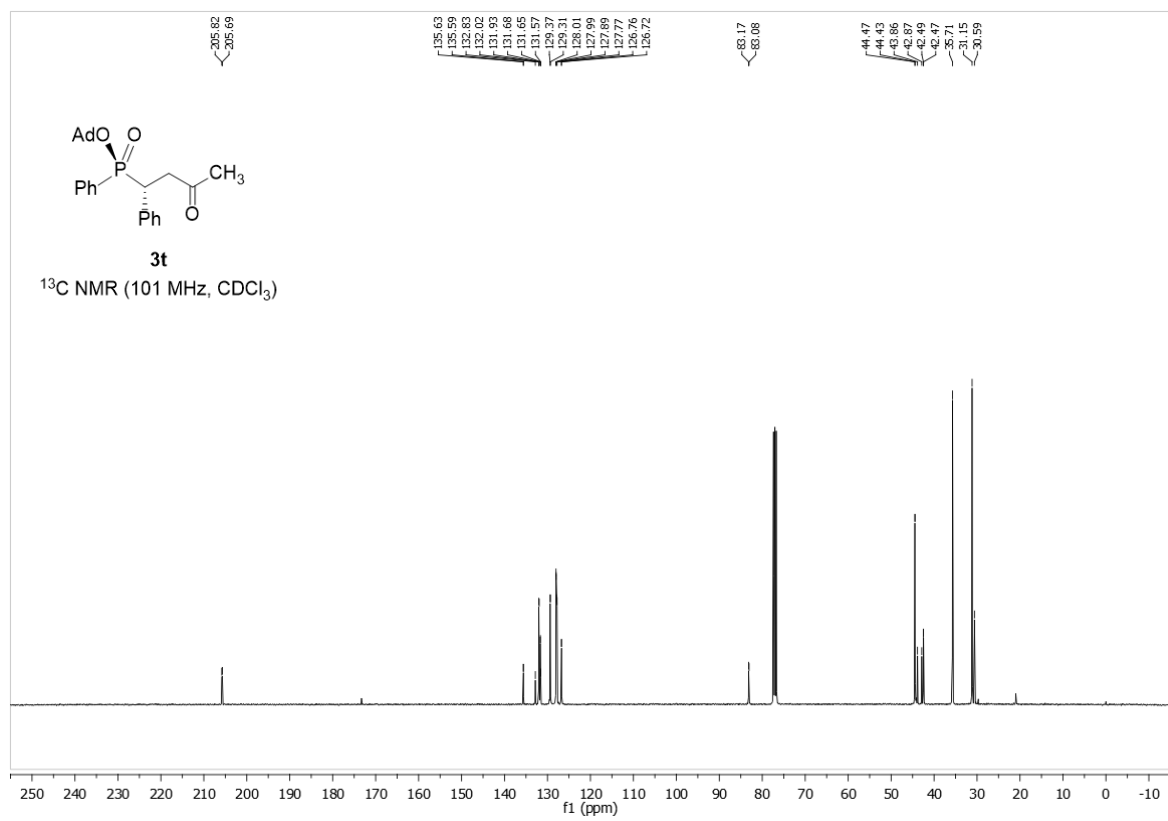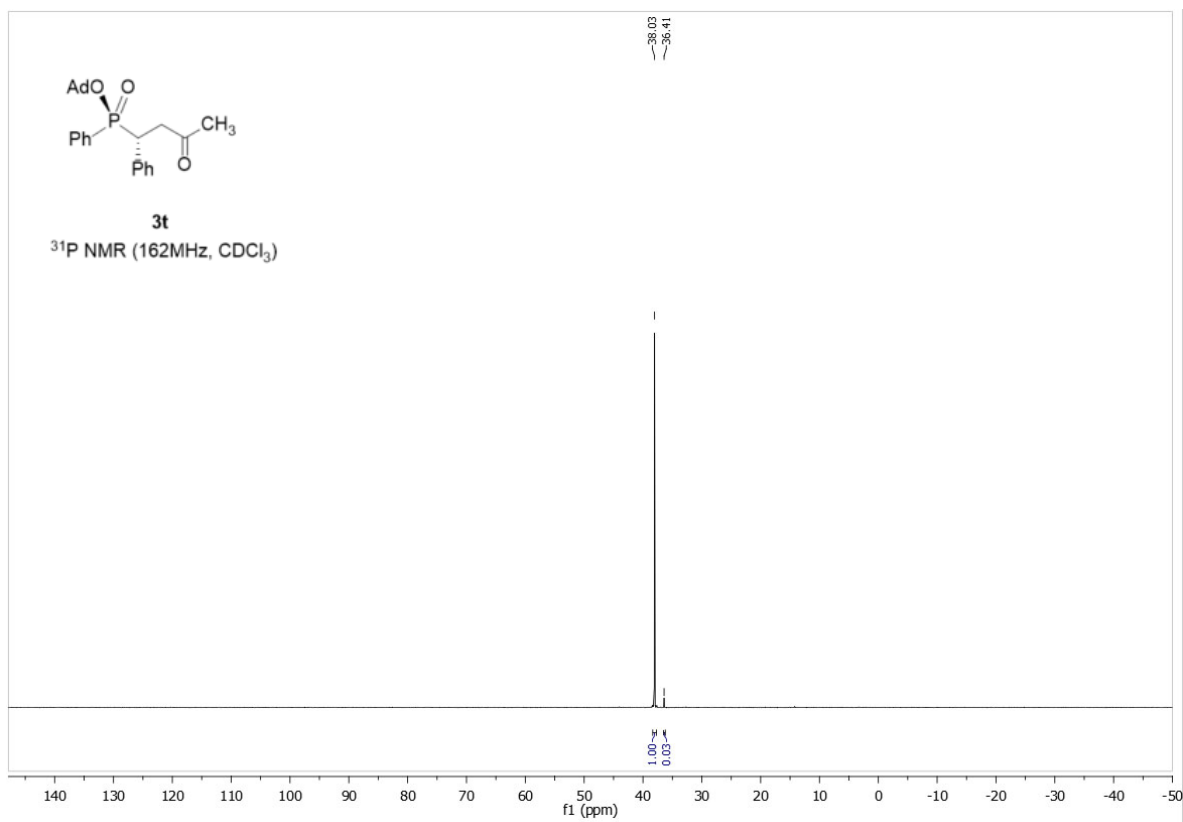



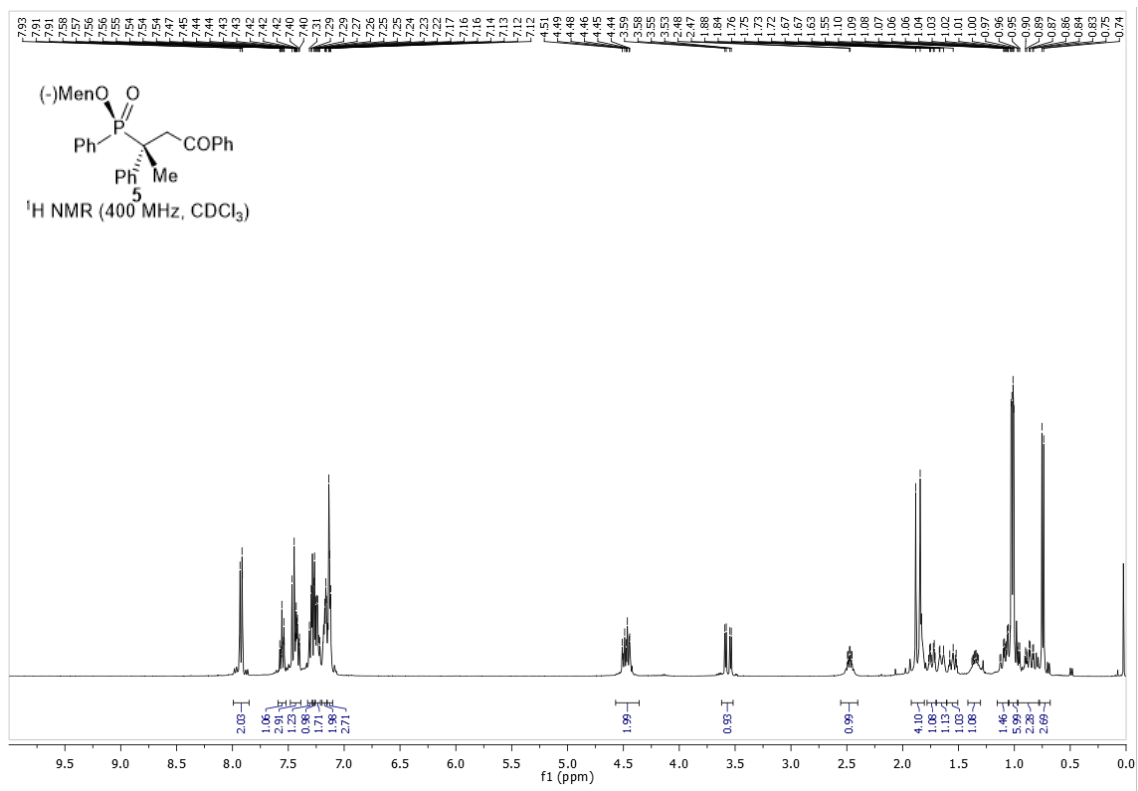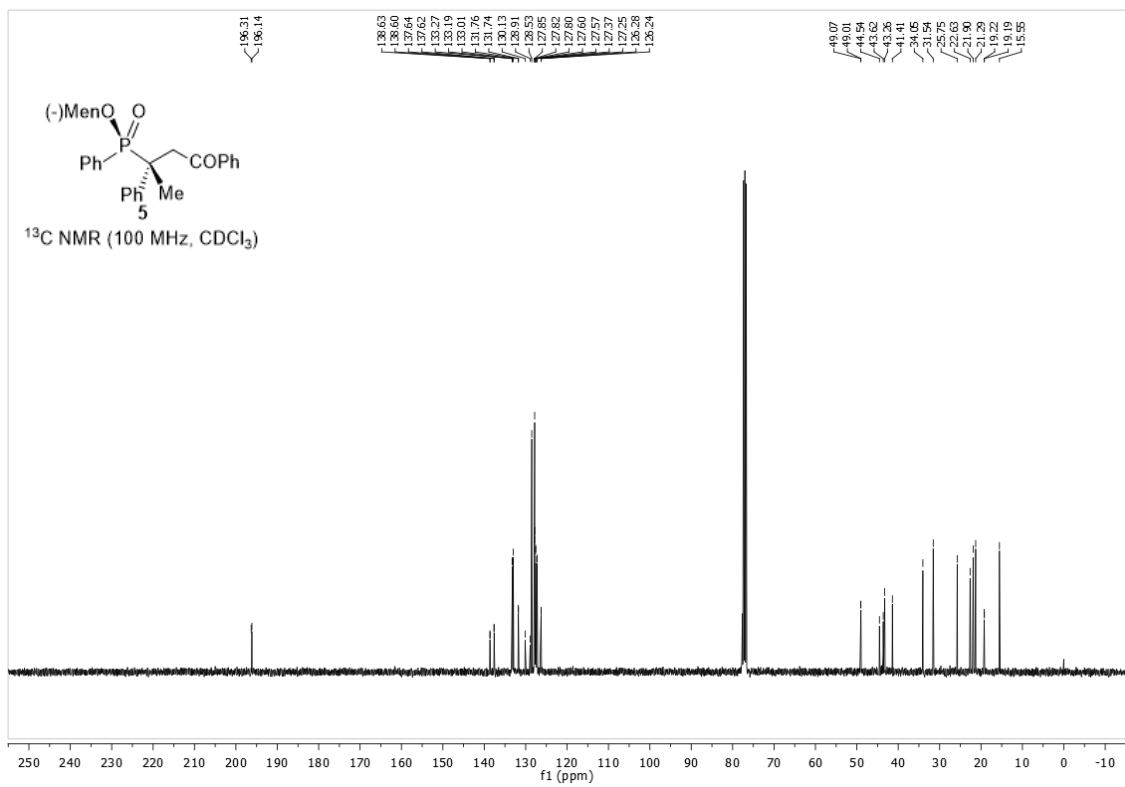

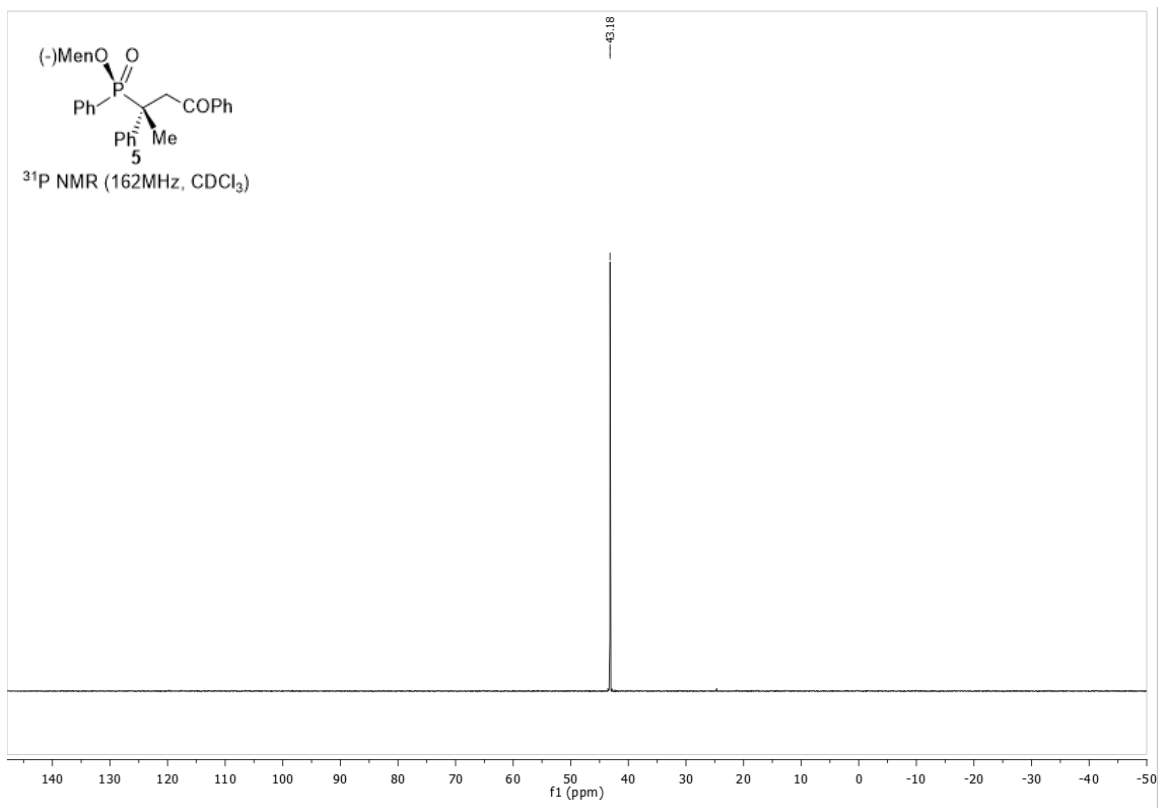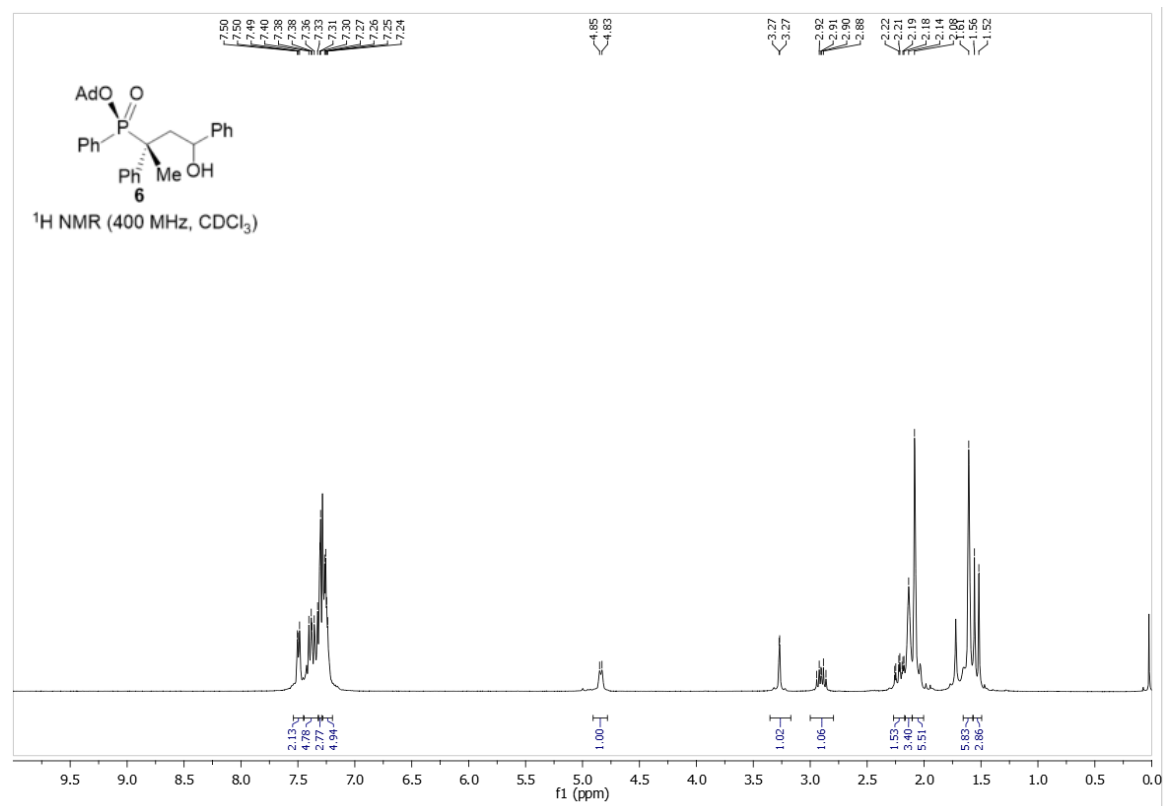

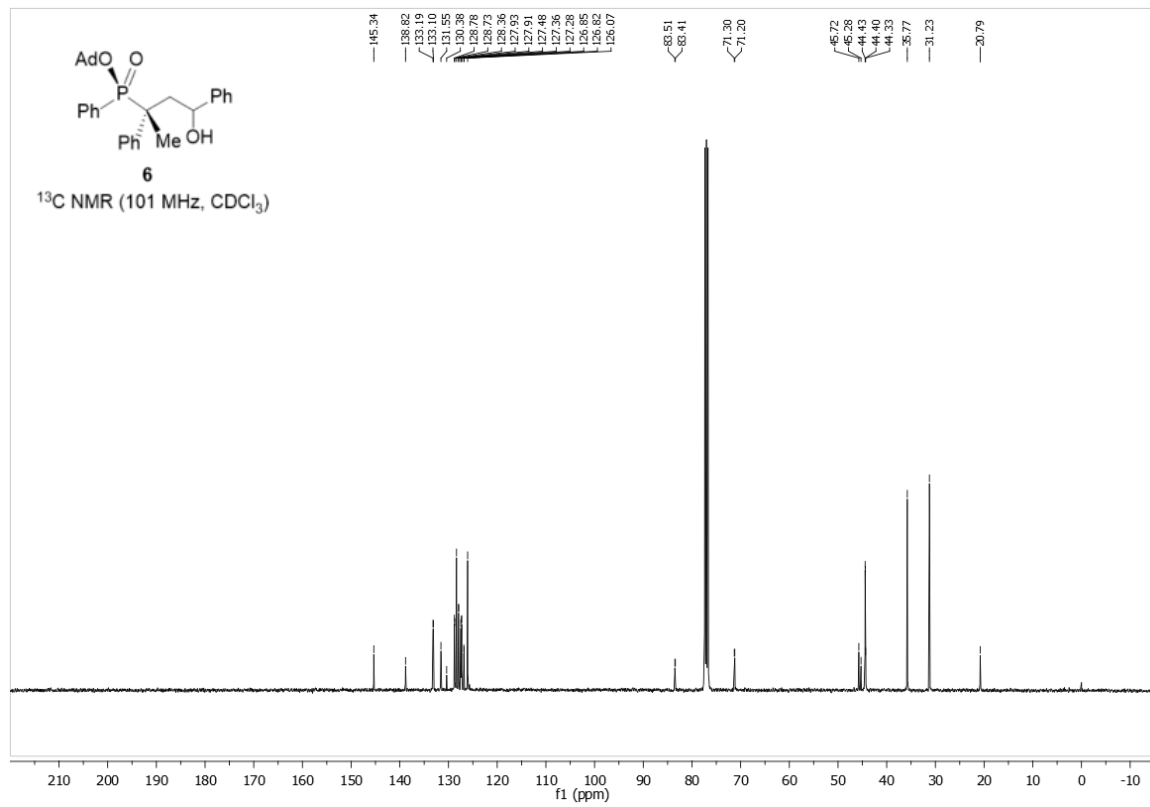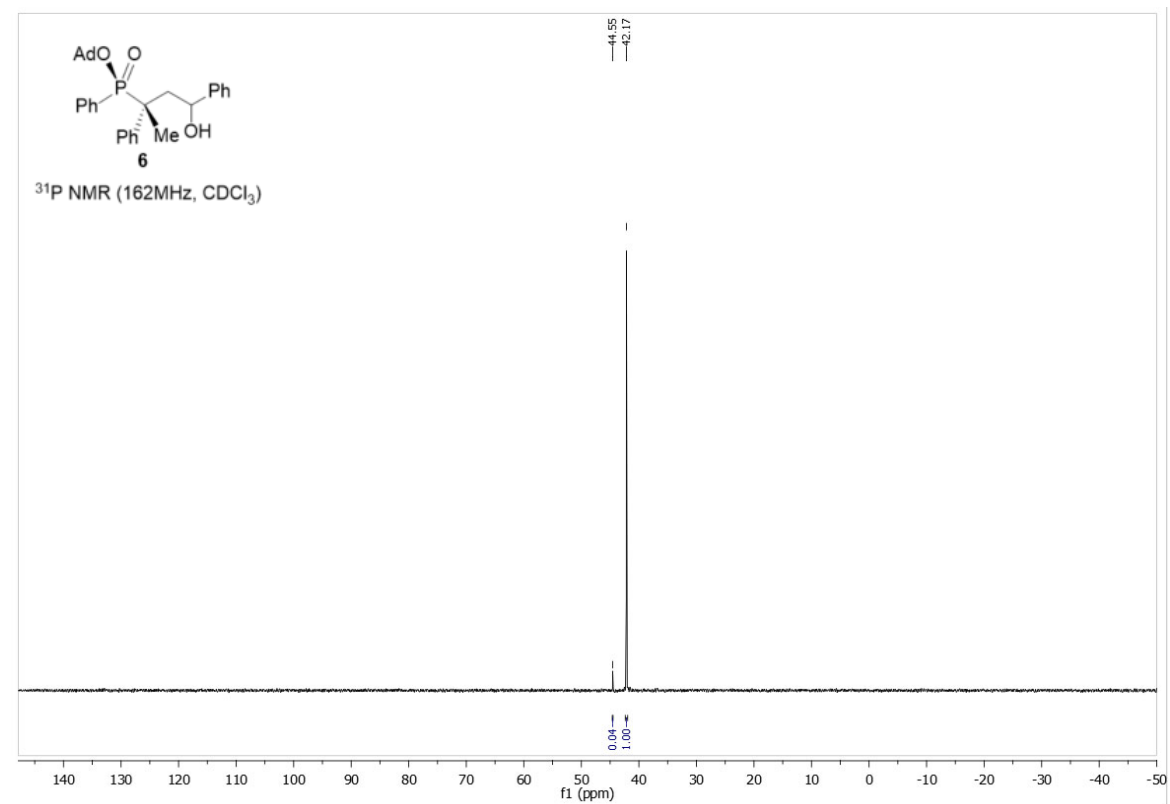

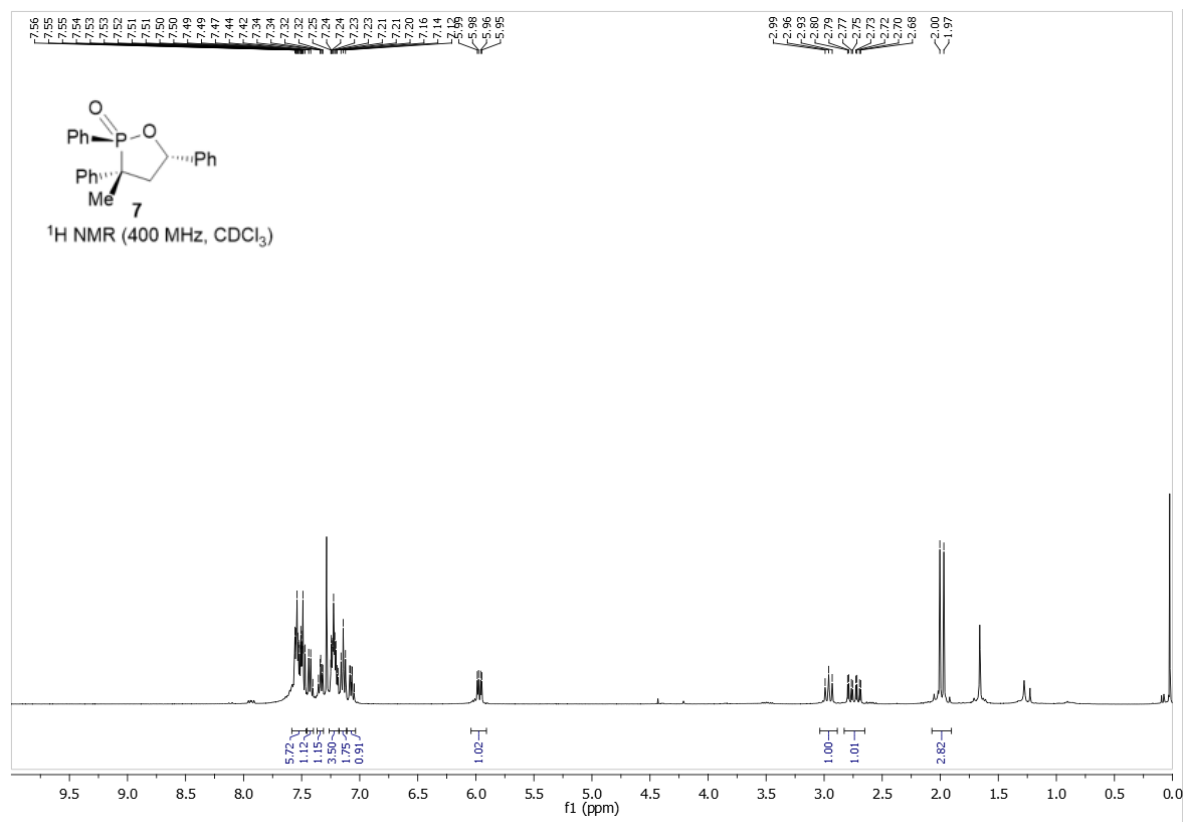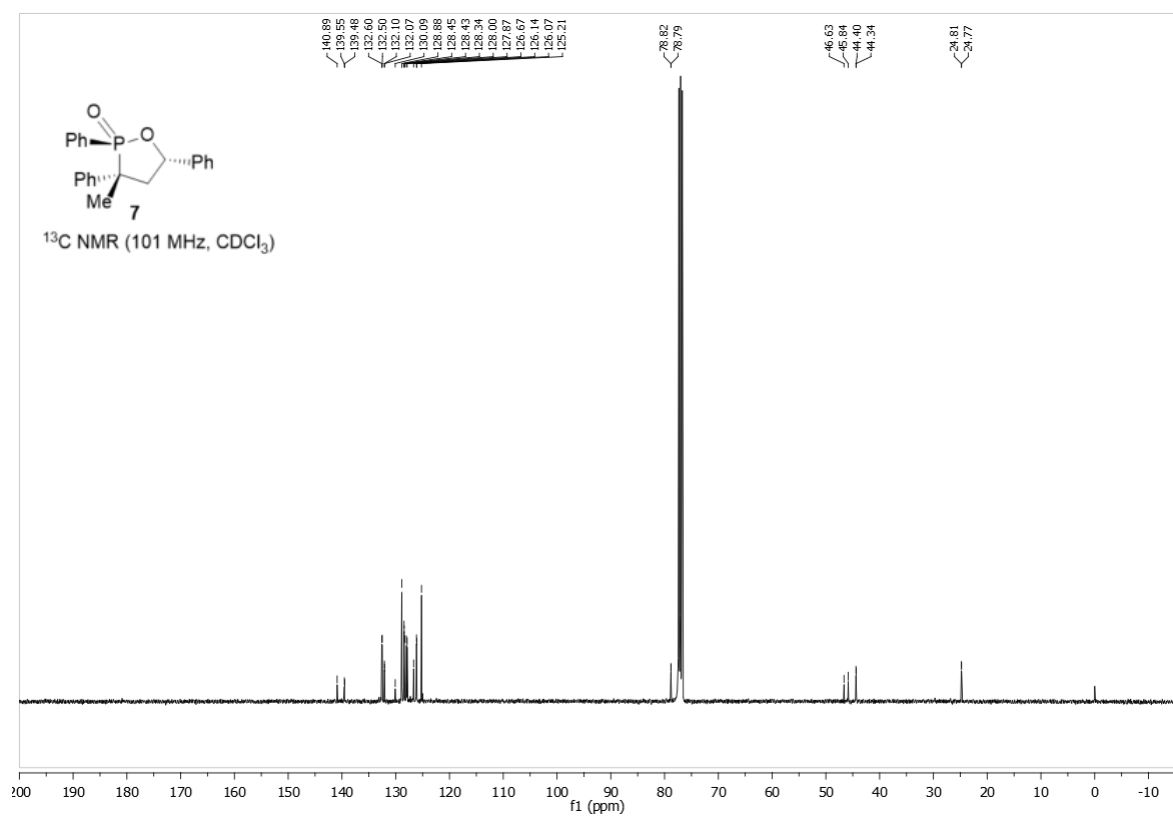

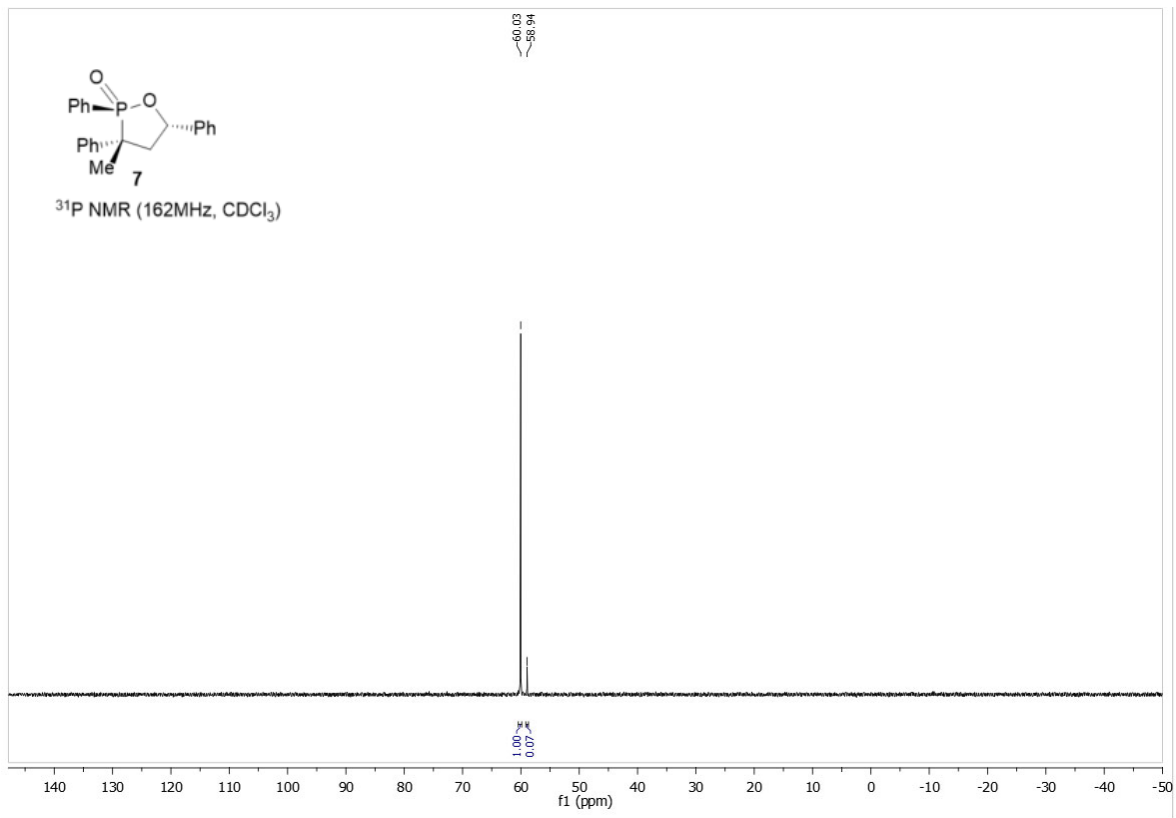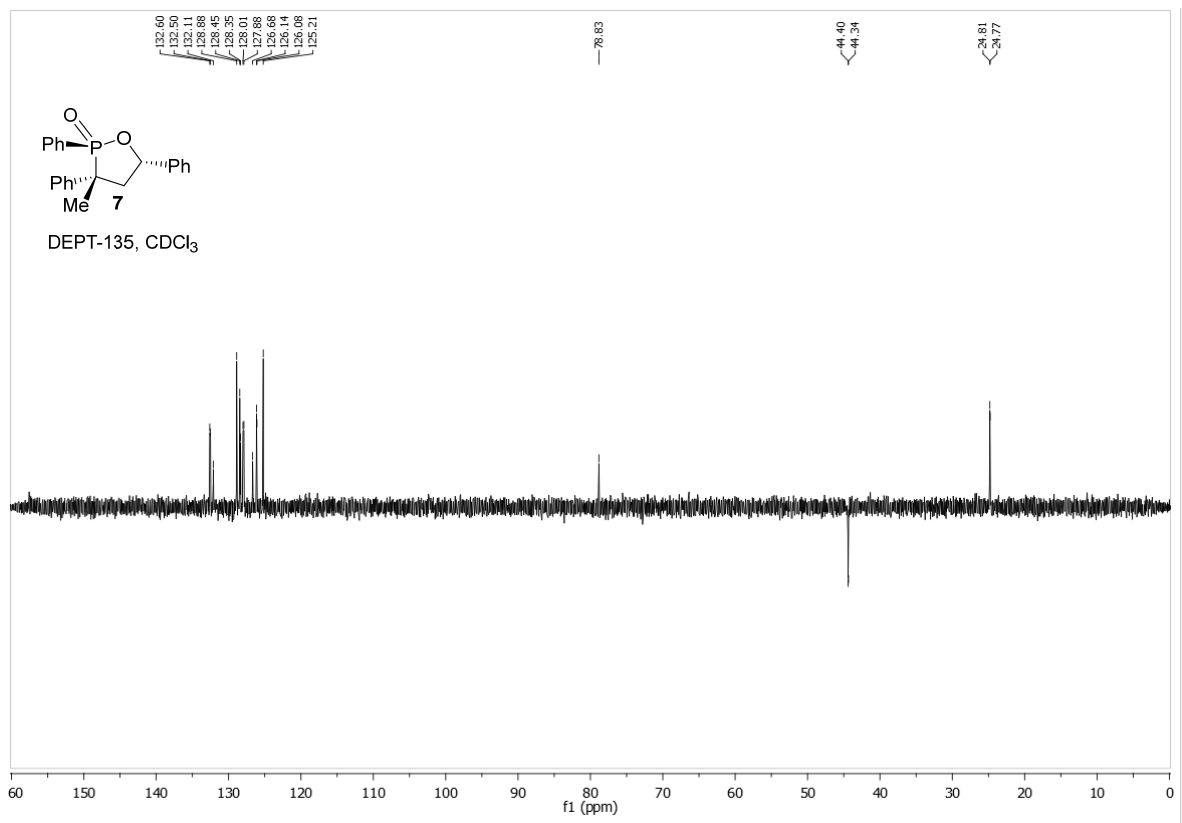

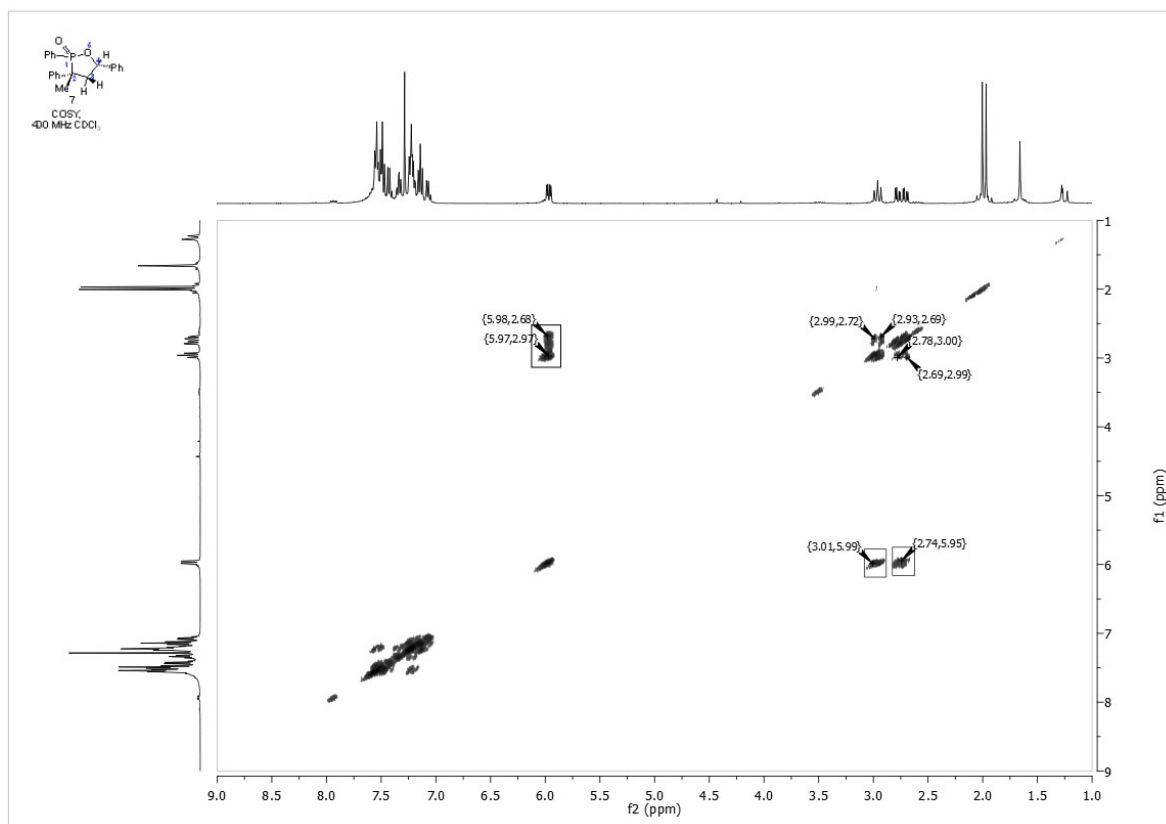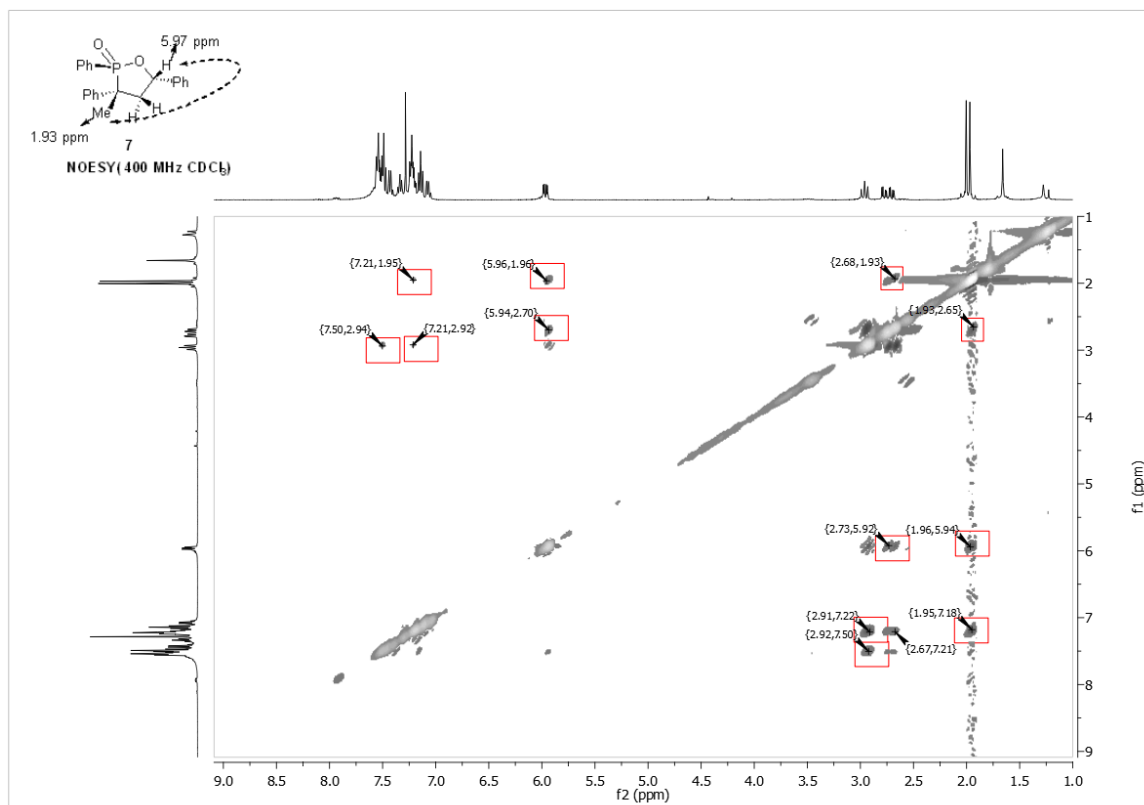

## 6. Synthesis of Enantiopure compound **3a** with HPLC data

In a scintillation vial (6 dram) containing adamantyl phosphinite (25 mg, 0.091 mmol, 1.0 equiv) in toluene (0.36 mL) was added (*2E*)-1,3-diphenylprop-2-en-1-one (chalcone) (23 mg, 0.10 mmol, 1.2 equiv), N-benzylcinchonidinium bromide (20 mg, 0.045 mmol, 0.5 equiv) and K<sub>2</sub>CO<sub>3</sub> (125 mg, 0.90 mmol, 10 equiv). The reaction was stirred at room temperature for 5 d. The reaction mixture was then quenched by adding water (5 mL) and extracted with ethyl acetate (3 × 5 mL). The combined organic extracts were dried (Na<sub>2</sub>SO<sub>4</sub>), filtered, and concentrated in vacuo to yield crude product, which was purified by pipette silica gel column to remove the excess chalcone and further purified by preparative TLC eluting with 25-30% EtOAc/hexanes to obtain the major diastereomer (35% yield). NMR data are consistent with racemic compound **3a**. The pure major diastereomer was then analyzed by chiral HPLC (equipped with a chiral Pak IC-3 column) and an ee of 5% was measured (see data below).

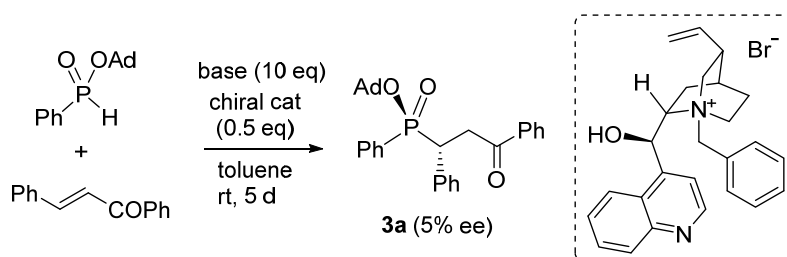

HPLC chromatograph of racemic compound **3a**:

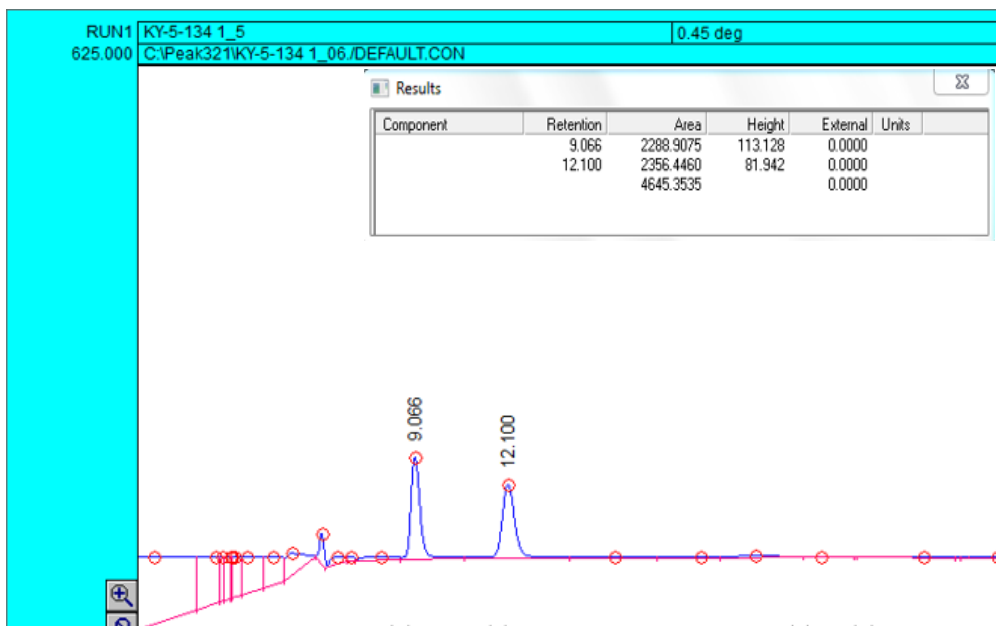

HPLC chromatograph of chiral compound **3a**:

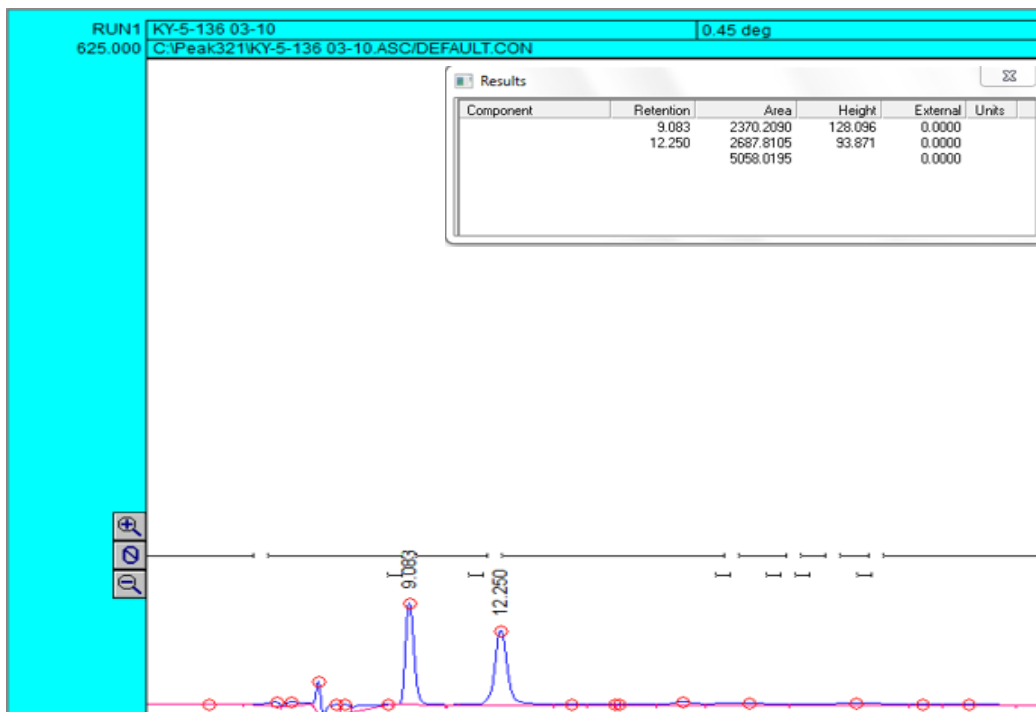

HPLC chromatograph was performed using chiral Pak IC-3 column (70:30 hexanes/isopropanol) as eluents with flowrate of 0.5 mL/min at 254 nm wavelength. Data were collected in triplicate and final %ee was calculated (see below).



Data for HPLC (triplicate study):

|        | <b>Racemic sample</b> |            |                      |  |
|--------|-----------------------|------------|----------------------|--|
|        | <b>rt-1</b>           | <b>rt2</b> |                      |  |
| area 1 | 2594.017              | 2553.649   |                      |  |
| area 2 | 2137.424              | 2195.808   | Avg %ee = <b>0.6</b> |  |
| area 3 | 2288.908              | 2356.446   |                      |  |
| avg    | 2340.116              | 2368.634   |                      |  |
| sd     | 189.9                 | 189.9      |                      |  |
| %rsd   | 8.1                   | 8.1        |                      |  |
|        |                       |            |                      |  |
|        | <b>Chiral Sample</b>  |            |                      |  |
|        | <b>rt-1</b>           | <b>rt2</b> |                      |  |
| area 1 | 2370.209              | 2687.811   |                      |  |
| area 2 | 2386.619              | 2616.303   |                      |  |
| area 3 | 2340.68               | 2654.524   | Avg %ee = <b>5.7</b> |  |
| avg    | 2365.836              | 2652.879   |                      |  |
| sd     | 23.3                  | 35.8       |                      |  |
| %rsd   | 1.0                   | 1.3        |                      |  |
